# Supplementary material
Source: HighWire-hosted journal article supplement (doi:10.1101/rna.079591.123)
Supplement: Supplemental_Table_S3.xlsx [file Supplemental_Table_S3.xlsx]

## Sheet: probe set sequences(Quasar570)
Noc2l-Intron12-570	probe sequence	ε(Oligo)
Noc2l-in12-1	AAG TCC AAC ACG AGT TGT GC	197100
Noc2l-in12-2	GTG TGG TTT CCT AAA GAC AT	195400
Noc2l-in12-3	CAC TGG CAG ACA CAG AGA CG	200600
Noc2l-in12-4	TCA CGG GGT CAT TGT TAG AA	198900
Noc2l-in12-5	GAG ACT CAA TGC AGA TCT GT	197800
Noc2l-in12-6	GGT GTC ATA GTA ACT GTG AG	203100
Noc2l-in12-7	GAC AGC GAC TCA AGG TAG AG	207500
Noc2l-in12-8	TTA GCA GGG GCT TGG ATT CA	193800
Noc2l-in12-9	TTA TCC TCG CCA TAG ACT AA	192300
Noc2l-in12-10	GAG CTG GTT ATC AAT ATC CA	199100
Noc2l-in12-11	CTG AGC AAA GGA TGC TAA CT	198000
Noc2l-in12-12	TGG AGG TAG GAA AAG TCC TT	203800
Noc2l-in12-13	ACC AGC TAC AGT GAT TAA TA	206400
Noc2l-in12-14	CGT AAC ATG TTG CTA GAA GG	201000
Noc2l-in12-15	GGA AGC CCT GAT AAG AGA AC	207700
Noc2l-in12-16	CAT AGA GAG GGG AGG TTC TA	209800
Noc2l-in12-17	GAG GCA CAA GGT ACA CAC AG	207700
Noc2l-in12-18	CCA CAC AGA ACA GGT AAA CC	202400
Noc2l-in12-19	TAA CCT CTT GGT CCG AGG AT	188300
Noc2l-in12-20	AAC AAA CCT TGC AGG CTC TA	193700
Noc2l-in12-21	AGG GAG ACT GTG TTT TCC AC	192000
Noc2l-in12-22	CGC CTT TAG ATA CGG ATC TG	188600
Noc2l-in12-23	AAG GAC GCC TGC ATA CAC TT	191900
Noc2l-in12-24	TGA GCC CCT TGA CAG ATA AC	192700
Noc2l-in12-25	TAA GCC CGA GCC AAA GAG AT	204500
		198964
Gabbr1-inron5	probe sequence	ε(Oligo)
Gabbr1-in5-1	GGA AGG GTT TCT GAT CTC AC	190900
Gabbr1-in5-2	GTG AAG AGT GAG GGG ATG GG	212900
Gabbr1-in5-3	AGT AAC AGG ACA CCC ACA AC	204200
Gabbr1-in5-4	AAC TAG AAT GGG TGG TGG GA	210500
Gabbr1-in5-5	AAA CAG GTA GGA GAG GAG GG	221800
Gabbr1-in5-6	CGG AAA ACC GCG ATT TGG CG	192500
Gabbr1-in5-7	AGA AAG CTG AGT CCG AGA GG	210300
Gabbr1-in5-8	CAC GAA GGA GAG ATC TGG GA	210200
Gabbr1-in5-9	CAG GTA AAA CCT GGG TAG GG	204400
Gabbr1-in5-10	GTG AAC AGG GTC GAC GGA AC	203700
Gabbr1-in5-11	AGG TGA TGG GAG AAA GGG TC	212300
Gabbr1-in5-12	GAG AAG TGC AGC TTA GGA GA	211800
Gabbr1-in5-13	TTG CAG AAG GGG AGA ACT GG	205200
Gabbr1-in5-14	GAG CGA GAG CGA TGG GAA AG	213700
Gabbr1-in5-15	ATG GAG CGA GGA ACT AAG GG	212400
Gabbr1-in5-16	TGG GTA GGT TAG GAG AGG AA	215500
Gabbr1-in5-17	CAG AGC AAA GAG GGG AAG CG	213200
Gabbr1-in5-18	GGA TTT GGA AGG AGA GAG GA	218400
Gabbr1-in5-19	TCT GCC TAA GGA GAC TAG AG	200000
		208626
Gabbr1-intron11	probe sequence	ε(Oligo)
Gabbr1-In11-1	ATC AGA AGC CTA CTG TAT GC	195700
Gabbr1-In11-2	CTC TGG GAA AAG TGT GCT TC	187400
Gabbr1-In11-3	TAT TAA GCA ACC CTC TGA GG	194100
Gabbr1-In11-4	TAG AAA ACA AGC CGG GGC TA	206700
Gabbr1-In11-5	TAG GTA CAC AGG TTA CGC TA	201500
Gabbr1-In11-6	CAG AGC AGA CTG GAG TTC AA	204500
Gabbr1-In11-7	GAT TCT AGT CAG GCA TTG TG	194300
Gabbr1-In11-8	CAG ATT CCC GAA TCT CAT TT	185800
Gabbr1-In11-9	TTT ACC ATA ACC TAC TTC CA	186200
Gabbr1-In11-10	ATA GCC AGA ATT CAC ATG GC	199800
Gabbr1-In11-11	AGC ATC CTG CTA GAA CAT TG	194400
Gabbr1-In11-12	GAT TGT TTT CTT GTC CTG TA	182000
Gabbr1-In11-13	TTC TAG GCT TTG GAC ACT TA	186700
Gabbr1-In11-14	TAA CAC TTT TAG CTG GGG TC	187700
Gabbr1-In11-15	CGC CTA TAA TTT TCC CTA AT	183400
Gabbr1-In11-16	ACT CTG ATC CAC TTC TTT TG	175800
Gabbr1-In11-17	ATT CTG CTG TTT CTC TAT GG	178500
Gabbr1-In11-18	AGG AGT ATG GGA ACT GAT CC	204900
Gabbr1-In11-19	GCA ACC TCT GTT GAA AAC CA	193200
Gabbr1-In11-20	GTC GGG TTT ATA TCA TCT CG	189300
Gabbr1-In11-21	ACT CAG GAC AGT ACA GCT AG	203500
Gabbr1-In11-22	TGC TCA GCA TGA TAT TAT CC	189500
Gabbr1-In11-23	TCA CCA TAT TGG GAA GGG AT	201500
Gabbr1-In11-24	TAG CCA ATC CTC AGT TCA AA	194800
Gabbr1-In11-25	CGA GCT AAC ACT TTC TGA GC	186300
Gabbr1-In11-26	AAT TGT CCT TAC TTT GTG CG	182600
Gabbr1-In11-27	TCA TTA ATA CCA TCC CTC TA	188200
Gabbr1-In11-28	CCA GTG TCC AGT GAA TAA GA	205300
Gabbr1-In11-29	GGT AGG TTG GAG ATA GTT CA	208100
Gabbr1-In11-30	GTG GCT ATA TAT GAC CAC TG	195300
Gabbr1-In11-31	CTG TAA TTC TGA CCC CAA AC	186500
Gabbr1-In11-32	GAC ATA CTA TAA ATG CCC CT	194500
Gabbr1-In11-33	ATC GTT GAG CAC AGC TCA AA	199400
Gabbr1-In11-34	AAA GGT CTG GGC TCA ACT AC	194700
Gabbr1-In11-35	TTC TAG AAA TAG CTT GGG CC	191600
Gabbr1-In11-36	TTC ACA GGC ACA CTC TAA CA	192100
Gabbr1-In11-37	GCC TTC CAC ATA ACA GAG AA	201100
Gabbr1-In11-38	TGA ATT CCT GAA CCT CTC AG	185700
Gabbr1-In11-39	AAG AGA ACT GGC CGT ATA GC	204900
Gabbr1-In11-40	AAC GGC AAT CCC TTT AAC TT	187500
Gabbr1-In11-41	CAG ATT CAG TCC TAT TCA CA	193000
Gabbr1-In11-42	ACA GGA AGC AGT CTT CAC AT	199700
Gabbr1-In11-43	ACT TCT CGC TAG TCT GAT AT	186000
Gabbr1-In11-44	CCA GGA GGA TTG TTC TTT AG	193400
Gabbr1-In11-45	GCT AAC AAC TCC TCC AAT TT	183900
Gabbr1-In11-46	CTT AAG AGT GTA CAG CTG CT	192200
Gabbr1-In11-47	GGG TAG ACC ATA TGT ACA GA	210900
Gabbr1-In11-48	AGC ATT GAA ATG TGC GTG GG	200600
		193431
Noc2l-exon	probe sequence	ε(Oligo)
Noc2l-ex-1	AGG AAC TCG TCC ACA CTG AG	196300
Noc2l-ex-2	GAA CTT GTA GAA CTC GGG GT	198200
Noc2l-ex-3	GAG TCA CTG AAG TCC AGT AG	203200
Noc2l-ex-4	AAC AGC CTG GGA CTA AGG TG	200700
Noc2l-ex-5	GGA ACG CCT GTA CAA CTT CA	192900
Noc2l-ex-6	CTG GAA CCT GCA AGT CTC AG	188600
Noc2l-ex-7	ACC AGA GCA TTG AAC ACA GC	201400
Noc2l-ex-8	ACA GAG GTC TCG AAT GCA GA	206500
Noc2l-ex-9	AAA CAG CAG CTT CTG AAG GC	197200
Noc2l-ex-10	TAT TGC TAT CCT TTG GTG TC	179100
Noc2l-ex-11	CAC AGT GGG CTA CTG GAT GG	193500
Noc2l-ex-12	TAG GTA TGT CTT GAC ATC CA	195400
Noc2l-ex-13	CTG ATA TGC TGC AGG ACA GC	191800
Noc2l-ex-14	TGT CAG GTA GTA AGG AAC CA	208700
Noc2l-ex-15	AAC ATT CGG CAC TGC TTA GG	190900
Noc2l-ex-16	ACA GAA CCA CCA TCC TCT TG	187500
Noc2l-ex-17	AGA CTC TGA TGA GTA CCA GG	202300
Noc2l-ex-18	CAA GGA AGG CTT CCT TCT TG	184600
Noc2l-ex-19	CAT GAT GTA CAT TTG CTT CA	190300
Noc2l-ex-20	TGC ATG AAG CTT ATG AGG GG	199900
Noc2l-ex-21	CAA GGC AAG CAT TTC AGT CA	198600
Noc2l-ex-22	CGT GCT GAT AGG AGA CGC TG	194100
Noc2l-ex-23	AAG CTG TCG GAT GTA GAG GA	209200
Noc2l-ex-24	GTT GTA CAC AGA CTG GTG TG	195700
Noc2l-ex-25	TAG AGG CAG TGC ACA TAC TG	200200
Noc2l-ex-26	TAC TCA GGA CTC GAC ACC AC	189300
Noc2l-ex-27	CAG GAT CTC ACT GGA ACC AA	197100
Noc2l-ex-28	TGA GAG AGG GTA GAG TAG CG	214700
Noc2l-ex-29	CTT GAT ACA GCC AAT GAT GA	200500
Noc2l-ex-30	ATA AAA TCG AGC AGT GGG CA	210700
Noc2l-ex-31	CGT ACA CAA TGC ATG CGC AA	196300
Noc2l-ex-32	TAT GAA GGT GCC GAT GGT CT	194500
Noc2l-ex-33	TCT CGA GAA TGA AGG GCA GG	203900
Noc2l-ex-34	TGA TGG GCT TGG AAC TCA TG	191300
Noc2l-ex-35	CAG GTA TTC CAG AGT AAG GT	204400
Noc2l-ex-36	TTT GCA CTC CCG GAG AAA AG	193900
Noc2l-ex-37	ATC TGG TCA GAC ACG CTG AA	197500
Noc2l-ex-38	TCT TCA CGA ACC TGC TTC TC	171400
Noc2l-ex-39	TGA TCT CTG GGA AGT TCA GG	194100
Noc2l-ex-40	CTC CTC TCT CAA AGA AGT CG	185100
Noc2l-ex-41	ATC CTC TGA ATC GCT GTC AC	181900
Noc2l-ex-42	CAC AGT TCG CTC AGA TCC AC	185300
Noc2l-ex-43	TTC TGA GAG CTG AAG ATC CT	192100
		195600
Noc2l-intron4	probe sequence	ε(Oligo)
Noc2l-in4-1	CAG CTT ATA CTG CTT CTT AC	179400
Noc2l-in4-2	CAA ACG AGG CGA GGC CAG AG	205100
Noc2l-in4-3	TTT TCA CCT GCT GTC TCA GA	178000
Noc2l-in4-4	TGC GCT TCC CAG AAA CAC AG	189500
Noc2l-in4-5	CTG GCA CTT GGA AAG ACC TC	186900
Noc2l-in4-6	TAA GGA GAC GTA GCT GGA GG	209000
Noc2l-in4-7	AGG AAG CAG GCA GGA CTA TG	209300
Noc2l-in4-8	AAC CCT GAT AGA GAG TGT GA	209000
Noc2l-in4-9	CCT ATA TGC AGG TGA GTA AG	203400
Noc2l-in4-10	GAA CTT GCA TAC GGT ACA CC	193500
Noc2l-in4-11	CAG CAA TGT GAG CCA GTT AA	202500
Noc2l-in4-12	GAC ATC ACC GTA CTT TTT GA	190300
Noc2l-in4-13	GAT CAC AAC ACA AGG CCT TT	193700
Noc2l-in4-14	TCC TGG GCT TGA TTT CTA AC	179100
Noc2l-in4-15	AGT GTG ATT ACC TAC AAT GT	199800
Noc2l-in4-16	CCC CAG TGA AGA AAT AAT GC	202100
Noc2l-in4-17	AGG ACA CTG ACT TCA TTT CC	187300
Noc2l-in4-18	CTG CAT TAC AAA CTT GCT CC	179800
Noc2l-in4-19	AAA TAG GTA TTG CGC ACA CC	199400
Noc2l-in4-20	ACT GGA CCA TGA GCC AAC AA	201600
Noc2l-in4-21	AGA GCA ACT GTG GGG CTA AG	203400
Noc2l-in4-22	AAC CTA ACC CAC AAT CTC AG	194100
Noc2l-in4-23	CCT GCT CCA AGT TGA AAA GG	193000
Noc2l-in4-24	AGA GTA GTT CAC AGT ACC TG	202500
Noc2l-in4-25	GGG GCA AGA GAT CAA GAT CA	213000
		196188
Polr2a-odd-exon	probe sequence	ε(Oligo)
Polr2a-1	TTC AAT TCA TCC GGA CTC AG	187900
Polr2a-3	AGC GCA AAA CCT TCA TTG TC	189600
Polr2a-5	GAG TCC TCA TTA ACA TGC TT	188600
Polr2a-7	CTC ATC TGA GAT GCG TTT GA	189600
Polr2a-9	AGT CAA TTC GAT CGC CAT TA	196900
Polr2a-11	AAA GTA GAC CAG GGG AGG AT	216700
Polr2a-13	TTC TTA CAA AGG ATG CCC AT	191300
Polr2a-15	CAG GAC CAT AAT CAT CCT TG	192500
Polr2a-17	ATC AGC CTT CGC TGA ATA TA	195100
Polr2a-19	TTC CAG CTC ATT CTG TAT AT	183900
Polr2a-21	TCA CCA GTT GGG AAG ATG AC	199700
Polr2a-23	TTT TCT GAG CAT TCC AGA TC	184000
Polr2a-25	GGA TCT TAG GTG GAT GTT GA	201400
Polr2a-27	CAA AGA ATG TCC TTG GCT CT	186900
Polr2a-29	TCA AAG TCG GGC ATC TCA TA	196400
Polr2a-31	ACT GTT CAT GAT GCG GAT TC	189800
Polr2a-33	TAC CGT GAA GAT CTC CAC AA	197600
Polr2a-35	GTT TCC TCA AAG GAG CAT TT	190500
Polr2a-37	TAT TTG CAC TTC TCA GCA TC	179900
Polr2a-39	GGA GAA TAG CTT GGA GAG GT	209900
Polr2a-41	TAG CTT GGT GAA GTT GGT GA	199000
Polr2a-43	AAT AGC TTG GAG AGG TTG GG	205300
Polr2a-45	GTT GGA GAC TGT GGT GTA TA	202400
Polr2a-47	ATT TAG GGC TTG TAG GTG AG	200800
		194561
Slc25a28-intron2	probe sequence	ε(Oligo)
Slc25a28-in2-1	AGC ACA GGA AGG CTC AAT AC	204700
Slc25a28-in2-2	AGA GAG TTT GGG AAG TGG GG	211200
Slc25a28-in2-3	AAA GCT GCA GCT CCA AAC CA	195900
Slc25a28-in2-4	CGA GCA CGT CAG GTT TGG AG	195500
Slc25a28-in2-5	ACA CTG TGA CCT TTG CTG AG	186200
Slc25a28-in2-6	GGA AAG TCA AGC TGG TGG TA	206700
Slc25a28-in2-7	AAG CTG ATG CCA GGG AGA TG	204200
Slc25a28-in2-8	CCA CCC AAC TAC CAA GAA AT	196200
Slc25a28-in2-9	AAT CCT GCC CTG AGA AGT AG	197600
Slc25a28-in2-10	ATG ACA TCC TTG AGA GTA GC	200200
Slc25a28-in2-11	CAT TTG TCA AGG CTT TGT CG	183600
Slc25a28-in2-12	TTC TCC AAA CAG TCC CTT GA	184100
Slc25a28-in2-13	CAC CCA ACG CCT AAA ACA TC	189900
Slc25a28-in2-14	ACC TTG TAT TGC TAT GTC TT	181800
Slc25a28-in2-15	CAC TCA ACA TGA CTC TGT CT	182100
Slc25a28-in2-16	TTT TGG CCC TAA ACC ACT AT	182900
Slc25a28-in2-17	ATC TCC AAA TCC TAT CGT TC	184800
Slc25a28-in2-18	CAG ATA GTC GGA ACC TCA TA	202800
Slc25a28-in2-19	AAG CAG ATG CAC TTC TGG CG	191900
Slc25a28-in2-20	AAA TGC AGT TAT GTC CTG GC	193100
Slc25a28-in2-21	GTT TTC AGT AGG GGA GTC TA	200100
Slc25a28-in2-22	GGC CCG AAA AGA GCA AAG AT	209900
Slc25a28-in2-23	GCA CAT TCC ATA TCT GAC AG	193000
Slc25a28-in2-24	CCC TCA ATT AAC AAT GTC AT	191600
		194583
Znrf3-intron	probe sequence	ε(Oligo)
Znrf3-N-in-1	CAG ACC CTT GAT GAC TGT TC	184000
Znrf3-N-in-2	CTT ACC TGA TAC GTA CTA CC	185800
Znrf3-N-in-3	ATG GGC TAG GGA TGC TCA AG	199900
Znrf3-N-in-4	GAA CTA TCA CAT CCA AGG GC	197600
Znrf3-N-in-5	CAC AGA GCC AAA TCA CCA TT	195800
Znrf3-N-in-6	TGA GCT CCT CAG GAA AGG AG	200400
Znrf3-N-in-7	AAC AGC TGT TCT CAG TGT AG	195200
Znrf3-N-in-8	ATA GGC ATC AAG GGA GAC CT	205400
Znrf3-N-in-9	GTG ATA TCT TAG GAG ATT CA	205100
Znrf3-N-in-10	CTT CAG TTC TAC CTA TGC TT	176000
Znrf3-N-in-11	CCC TGG GAA CTA ATT CAC TT	184600
Znrf3-N-in-12	ATC TGT GAT CTG TGA GGA GT	197900
Znrf3-N-in-13	CTA TCT CCT AAT CAC CTC AA	184600
Znrf3-N-in-14	CTT CGA TCT CAG CTC CAC AG	180300
Znrf3-N-in-15	TCA TTT CCA TCT CCA TCG AG	182100
Znrf3-N-in-16	TTG TTC CTG CAG CAT GTC AG	183000
Znrf3-N-in-17	TAA CTG GAG ATG CTC CTT TT	184800
Znrf3-N-in-18	GAT GTC TGT TTT TGT GTG TT	182400
Znrf3-N-in-19	TGC TAT CGT GAC TTT TCA GT	182900
Znrf3-N-in-20	ATC ACG GTC CTT ATA CTA GA	198100
Znrf3-N-in-21	AAT TGT TTG CTC TCC CAC TT	174800
Znrf3-N-in-22	AAA GTC CTG ACA GAG GTC AC	202200
Znrf3-N-in-23	ATC CCT GTG TCT ATC AAA GA	196100
Znrf3-N-in-24	ACT ATT CTG CAT CTC CTA TG	182300
Znrf3-N-in-25	TGC TTC ATA TCC CAA AAG CA	193000
Znrf3-N-in-26	CTA TAT CCA TGA TGT TGG CA	193900
Znrf3-N-in-27	TCA AAC ATT GCT TTT CAG CC	181800
Znrf3-N-in-28	TGG CTT CTG TAC TTG ATG AC	182800
Znrf3-N-in-29	TTT TTG TTT GGC TTC CTC TG	166600
		188945
Srsf2-intron4	probe sequence	ε(Oligo)
Srsf2-N-in4-1	GTT AGA CAA ATG TTA CAA AA	214300
Srsf2-N-in4-2	GGC AGA TTA AAA CAA GTA AA	219400
Srsf2-N-in4-3	TAA AAT GAA GTT TGC CAC CT	195300
Srsf2-N-in4-4	ATA ACA GCA ACA AAA TGG CA	213900
Srsf2-N-in4-5	CCT CAC TAA ATT ACA AGA AA	205100
Srsf2-N-in4-6	TAA TGA AAT CTG AAG TCG CT	199600
Srsf2-N-in4-7	TTA CCT CAA ATA TCC AAT CC	189700
Srsf2-N-in4-8	AGT CAG CAC TAT AAA CAA AA	214300
Srsf2-N-in4-9	GAG GCC ACA AAT TAG GTT AC	202600
Srsf2-N-in4-10	ACA TGT TTC CTT ATT AAG TC	190500
Srsf2-N-in4-11	TTA GGC TGT ATG TAA TGG CT	193200
Srsf2-N-in4-12	TTG AGT CAT TCT GCT GAC AG	188400
Srsf2-N-in4-13	ATT ATT AAG AAG TGA AGG CA	216800
Srsf2-N-in4-14	ACA CCA ACT TTC ATA GGT TT	191400
Srsf2-N-in4-15	GGT AAA TAA CAT ATA TGA AC	215900
Srsf2-N-in4-16	CAG ATT ATC ATA TAG ACC TG	202000
Srsf2-N-in4-17	AGT CTT TAT ACA AAT TTG GG	199500
Srsf2-N-in4-18	AAT TAA GTC TTT TCA CCT GA	193400
Srsf2-N-in4-19	GAA GAG ATT AGA ATT GTG TT	210500
Srsf2-N-in4-20	TAG TGC ACA AAA ATA CAT AA	215100
		203545
Srsf2-exon	probe sequence	ε(Oligo)
Srsf2-N-ex-1	GAG GTC ATG CCC TCC ACA TC	183700
Srsf2-N-ex-2	TAG GTC AGG TTG TCC ACC TT	185400
Srsf2-N-ex-3	CAG GGT GTC GGG CGA GGT GC	191600
Srsf2-N-ex-4	CGT ATT TCT CGA AGA CGC GC	186400
Srsf2-N-ex-5	ATG TAC ACG TCG CCG ACG CG	189600
Srsf2-N-ex-6	CTT GGT GTA GCG GTC CCG CG	179800
Srsf2-N-ex-7	CGA AGG CGA AGC CCC GGG AC	193400
Srsf2-N-ex-8	TCG CGC TTG TCG TGG AAC CG	180600
Srsf2-N-ex-9	GGC GTC CAT GGC GTC TTC GG	179900
Srsf2-N-ex-10	ATC TGC ACC CGC AGC TCG CG	177300
Srsf2-N-ex-11	CCG GCT TCG AGA TCG GCT GC	178300
Srsf2-N-ex-12	GGC TTC GCG ACC TGG ACC GA	184300
Srsf2-N-ex-13	TTG GAG CGG CTG TAG CGG GA	194900
Srsf2-N-ex-14	CGA GCG AGT GCG GGA CCG AG	197600
Srsf2-N-ex-15	ACT TGG AGG TTG ATC TGG AG	197900
Srsf2-N-ex-16	TTG GAT CTT CGG GCA GAT CT	185900
Srsf2-N-ex-17	GGA GAC GGA GGA GGA CTT GG	207700
Srsf2-N-ex-18	ACC TTG ACC TCG AGC GGG AT	188500
Srsf2-N-ex-19	GAG GGC TTC TCG ATC GCG AC	185800
Srsf2-N-ex-20	GAC TCT CGC TTC GAC ACG GG	182200
Srsf2-N-ex-21	CTT GGA CCG CGA CCT AGA CT	183800
Srsf2-N-ex-22	CTT CTG GAG ACT TGG GTG GG	187200
Srsf2-N-ex-23	TAG GAA GAA ACT GCT CCC TC	191100
		187517
Cstf1-intron5	probe sequence	ε(Oligo)
Cstf1-in5-1	ACA CTG GGA TCT CTT CTG AG	187800
Cstf1-in5-2	CTG AGG GTC TAC TTC ACA TA	192200
Cstf1-in5-3	GCT GGG CAA ATC CAA ACA TA	201400
Cstf1-in5-4	AGT AGA CAC CAC TCA CTG TA	199900
Cstf1-in5-5	TCT TAG CTG CTA GGG AAC AG	193900
Cstf1-in5-6	AGA GGT TTT CTA GCC CAA CA	196700
Cstf1-in5-7	AAG AGG AAC CAG TGG AAC CA	213900
Cstf1-in5-8	TTA ATG CGA GTC GCA CTC AC	188400
Cstf1-in5-9	TCC TGC GAG CTC TGA ATC TG	179700
Cstf1-in5-10	AAC TCA GCT CCT TGC AAT AC	186500
Cstf1-in5-11	CAC ACA GAG GAA CTG TGC TG	196000
Cstf1-in5-12	CCT GGT TCT AAG ACA TCA CA	192600
Cstf1-in5-13	TGA ACA CTT CTG CAT GCC AG	185900
Cstf1-in5-14	ACC GAA AGC TTT CTC ATT CA	189800
Cstf1-in5-15	GAA GCA AGG GCT GTC ACT TG	194500
Cstf1-in5-16	TAG CAC TTC GGA ACA TGT CT	189600
Cstf1-in5-17	AAA TAA GCA CCC TAA GCT CC	195900
Cstf1-in5-18	GGA ACG TGT CTA TAT ATT CC	195400
Cstf1-in5-19	CAG GGA GCT GAC TTA GGA AT	201400
Cstf1-in5-20	GCA AGA ACA CTC TGC TTT CT	182900
Cstf1-in5-21	CCA TGA ACT CAG CAC ATC TA	193200
Cstf1-in5-22	GCC CAT TTA CTG ACT AAG AC	191100
Cstf1-in5-23	CCT TGT AAA TTC TGG CTC AC	180200
Cstf1-in5-24	TTT TAT AAC CAA CTG TCC CC	182100
Cstf1-in5-25	GAA AGA CAC CAC CAG TTC TC	194700
Cstf1-in5-26	TTG TAG ACA GTT TGA TGA GC	198600
Cstf1-in5-27	CCA ATA AAA CAA CAG TCC CT	197500
Cstf1-in5-28	GGG CTG ACT TTT TCA AAC TT	182600
Cstf1-in5-29	TTA CCA AAT GAC TTA GCA GT	197700
Cstf1-in5-30	GAC CTG ACA ATT ACC TTT CT	184100
Cstf1-in5-31	TGT GTG CAC GGA CAG ACT TA	196000
Cstf1-in5-32	TAA GTT CCA GTG ACT CTC AG	192000
Cstf1-in5-33	TTC TGC AGT GAA CTG TGA GT	190900
Cstf1-in5-34	AAA GGC TGC GTG TAG TGA TG	201800
Cstf1-in5-35	AAG GAG ATG CTA CCA GGA GA	213900
Cstf1-in5-36	GTG ACA AAC GAG TCT CAG CA	201900
Cstf1-in5-37	TCT AGT GTC TAC TCT CTC TG	175400
Cstf1-in5-38	CAT AGT TAG CGG GGT AGA TG	205000
Cstf1-in5-39	CAC GGC TAT GGA GGA AAG AC	204300
Cstf1-in5-40	GAA ACC AGA AGT CAC ACG CC	200000
Cstf1-in5-41	ACA TAC TGC ACA CGC ACT TC	186000
Cstf1-in5-42	TCA TGA TGG CCT CCC AAA TA	192100
Cstf1-in5-43	GCT GGT TCA TGT TTA AAG CA	194300
Cstf1-in5-44	GCT TGT AGC CAC TGA ACA AT	192300
Cstf1-in5-45	TAA TGA TCC TTT TGC TGC TG	179700
Cstf1-in5-46	TGT TTG TTC ACT CTG GTC AC	176800
Cstf1-in5-47	TGA TGA TGT GAG GTC GCC TC	189200
Cstf1-in5-48	TGT CAC ACG AAC CAA CAC GT	193800
		192742
Rad9b-intron12	probe sequence	ε(Oligo)
Rad9b-in12-1	TAA GCA GCT AGA CCT GAG AG	204100
Rad9b-in12-2	CAG GTT TGC ACG TAA TCT AC	190600
Rad9b-in12-3	GAG CTG TTA CGT AAG TGC AT	197600
Rad9b-in12-4	TTG GTG AGA GCG TCC TAC AC	190400
Rad9b-in12-5	CCT GTA ACC GAC TGT ACA CA	191500
Rad9b-in12-6	AGC AAG CAC ACG TTC CTG AG	195100
Rad9b-in12-7	CAG GTT GGT GCT TTT CCA AG	185000
Rad9b-in12-8	TCA CTT CTG AAG CCG CTG AC	180200
Rad9b-in12-9	CTC TGG TTT CAG CTA GAA CG	186800
Rad9b-in12-10	CTC ACT TAG CAG CTA CAG AA	195500
Rad9b-in12-11	CAT TTT CGG ATG GAG TTG GG	193000
Rad9b-in12-12	AAG CCC ATT TTC ATT CAC AG	190300
Rad9b-in12-13	AGC TTC CAC TAA AAG CTT CT	186700
Rad9b-in12-14	AAG GCT GAG ATA GGT GGG CA	209000
Rad9b-in12-15	ATC TTC AGC CTA CGA CAG AG	195500
Rad9b-in12-16	CAG TGT AAA CAT GAG ACT CC	199400
Rad9b-in12-17	CCC GGT AAG ACT GTC TGA AA	196700
Rad9b-in12-18	CAG GGA GAC CTA CAG AGT AG	208800
Rad9b-in12-19	CTA GTG TCG TAG TGT CAC TG	190200
Rad9b-in12-20	CTG GAA GTG CAA AGC TCT GG	192800
Rad9b-in12-21	CTA TGC TAG GAT GTG CAA GG	197700
Rad9b-in12-22	TTC CAG ACA GTA CTG AGT GA	200700
Rad9b-in12-23	ATA GAG GGT TTT GTA GCT GG	200800
Rad9b-in12-24	ACC GAC TGA CAA TTG AGT GT	198300
Rad9b-in12-25	CCG GAA TGG CTA GTT ATC AA	199000
Rad9b-in12-26	AGA TTC TTG GTC TGC CTG AC	183000
Rad9b-in12-27	TGG ACA GGA ACT GAG ACA CC	201300
Rad9b-in12-28	TTT ATA CTA TTT GCC ACT CC	179300
		194261
Ptbp1-3utr	probe sequence	ε(Oligo)
Ptbp1-3utr-1	GAA TGG TGG AAG CTG ATG CA	204700
Ptbp1-3utr-2	CAG CTG CTT TTT AAA GTG GC	184600
Ptbp1-3utr-3	AAT CTC TGG TCT GTA AGG TC	190800
Ptbp1-3utr-4	ACA GGT AAA CTG ATC TCT CT	192800
Ptbp1-3utr-5	GCA GAG TGG GCT AGA TTT AA	205500
Ptbp1-3utr-6	CAT GGT GCT GGG ATT GAC TG	189300
Ptbp1-3utr-7	AGA AAG CGG CTA TGT TTG GG	200600
Ptbp1-3utr-8	GAG GCA CGC TGG TTT GTA AG	195300
Ptbp1-3utr-9	CTT AGA GGG TGG GTG TAC GG	198600
Ptbp1-3utr-10	CAG GTC TAG AGA CAA CTG GT	200100
Ptbp1-3utr-11	ATT GGG GAG CCT ATG TAT AG	203200
Ptbp1-3utr-12	TTA TAA GGG TGT AGG GGA GT	209100
Ptbp1-3utr-13	GGG ACA TGG GAG AAT CAT GT	206800
Ptbp1-3utr-14	AAG GTC ACA ATG AGG CTC GG	201700
Ptbp1-3utr-15	CTG TGA CCA CAC GGA ATA GA	202000
Ptbp1-3utr-16	AAA TAT TGC TAG GCA CAG GT	203300
Ptbp1-3utr-17	ATT CGG GTA TTT GGT CAA GT	196300
Ptbp1-3utr-18	AGG GGA CAT AGA AGC TCA GA	214100
Ptbp1-3utr-19	CAA GTT GGT CAC TGG AAG GA	202700
Ptbp1-3utr-20	TCT CAG AGC TTT TTC TCC AG	177900
Ptbp1-3utr-21	TTT GAA GGT AGA AAC CCA CA	204700
Ptbp1-3utr-22	GAA AGC TAA ACT TTG GTC CA	198600
Ptbp1-3utr-23	TCA ACT GGG CAC AGT CAG AG	197900
Ptbp1-3utr-24	AGG ACA TTA AGG CCT AGA GG	209100
Ptbp1-3utr-25	GGA ACA GGC TAG GAT AGA GG	213700
Ptbp1-3utr-26	AGA ACC AGG GTG CAG GGA AC	207300
Ptbp1-3utr-27	ATA TTT ACA CTC TTC CAC GC	183400
Ptbp1-3utr-28	AGC CCC ACA GGT ATA AAA TC	202000
Ptbp1-3utr-29	TAA AAA ACT GCT GCA CCG CC	188300
Ptbp1-3utr-30	GGA CAA TAC TGA GCC TGT AG	200400
Ptbp1-3utr-31	CAA TAC ACC ATC TGG GAT GG	196400
Ptbp1-3utr-32	ACT GCT TTA ATG GAA AGC CC	191700
Ptbp1-3utr-33	CTC AGG GAA GAC AGA GGT TA	209200
Ptbp1-3utr-34	GCC TAC AGC TCA GAA TGA AG	200000
Ptbp1-3utr-35	GGT GTT TAT TGA ATC CAG GC	193000
Ptbp1-3utr-36	CAA TGA CAG GCA GGA GTG TA	208800
Ptbp1-3utr-37	TTT GGA AGA GCA GTC GGT AC	199100
Ptbp1-3utr-38	GTG GTT TGG ACT TGA ACT CA	191800
Ptbp1-3utr-39	CTT ATT ATG GTT GGC TGT GA	189700
Ptbp1-3utr-40	CAC ATC AGA AGA GGG CAT CA	206500
Ptbp1-3utr-41	AAG TAC ACT GTA GCT GAC CT	195200
Ptbp1-3utr-42	CTC ACT CAG GCA CAA AGA CT	191500
Ptbp1-3utr-43	TGT GGT TGT TGG GAA TGG AA	201100
Ptbp1-3utr-44	CTG ATA GAT GGT TGT GAG CC	194700
Ptbp1-3utr-45	ATG TGA GTA CAC CAT AGC TG	200700
		198982
mouse-Malat1-odd	probe sequence	ε(Oligo)
m-Malat1-1	AAG CCT TCA TGT TAT CTC TT	182600
m-Malat1-3	TTT AAT CTA CAA GGC CGA CC	190900
m-Malat1-5	AAC AGC TTT TTC TTC ACC TT	176500
m-Malat1-7	TGT GGC TGT CTA AAG ACT CT	186800
m-Malat1-9	TTC CTA GTT CAC TGA ATG CA	188700
m-Malat1-11	GTT ACA GAA AAC CAC CAC CA	202100
m-Malat1-13	GCC TTT AGG ATT CTA GAC AG	194900
m-Malat1-15	TAA ACT ACC AGC AAT TCC GC	190900
m-Malat1-17	ATT CAT CCA ACA GCT TCA GA	195900
m-Malat1-19	GCC TTT ACT TAT CAC TCA TT	179000
m-Malat1-21	TTT GCA TAT GCA GCT TTT CA	183900
m-Malat1-23	GAG AAA CCT GTC TGA GGC AA	203000
m-Malat1-25	ACA TGC AAT ACT GCA GAT CC	195900
m-Malat1-27	AGC ACA TAA TGA TCC CTT TC	190800
m-Malat1-29	TCT TTC CTG CCT TAA AGT TA	181800
m-Malat1-31	TGG GGG AAA AGT GTC TTA CC	197100
m-Malat1-33	GCA GAT TGG AAC AGT ACT GC	198700
m-Malat1-35	CGG GTT ACT TAA AGC TGC AG	193200
m-Malat1-37	GAT AGA TGT CTG CTG TTG TC	189500
m-Malat1-39	AAA GAA CTA GGG CTT CCC AA	202500
m-Malat1-41	AAG GTG TTA CGG TAG GGT AG	209500
m-Malat1-43	TAT GCA ACG TGA CCT CAA GG	195700
m-Malat1-45	TAT ACC CAT ACT GGT TTG TT	187200
m-Malat1-47	TCT GTT ATG TCC ACC TGA AA	189100
		191925
Stellaris-Lexis-570	probe sequence	ε(Oligo)
stellaris-Lexis-1	ctctagctccggagtcag	190800
stellaris-Lexis-2	tctcgctcgaatgtgctc	200600
stellaris-Lexis-3	ttgtttgcacccacgtag	203200
stellaris-Lexis-4	cccgggcagaaactggag	201700
stellaris-Lexis-5	agttgttagatccggctc	203300
stellaris-Lexis-6	aggtaggggcttgaactc	177900
stellaris-Lexis-7	agagaccacaggtcggtc	183400
stellaris-Lexis-8	tggggagcattgtccaac	196400
stellaris-Lexis-9	ggtattctgtttgcacct	208800
stellaris-Lexis-10	agagacaaagcccggtca	195200
stellaris-Lexis-11	cctccatactgctgcaaa	190900
stellaris-Lexis-12	ccaaagccttgctccaac	190900
stellaris-Lexis-13	taagggctgttttgtgcc	179000
stellaris-Lexis-14	ccaagtgctcaagtgtcc	203000
stellaris-Lexis-15	agagaggtgccatgaagc	198700
stellaris-Lexis-16	aggtggcactgagagtgt	209500
		195831

## Sheet: Quasar570-Vis
	probe-set name	OD (260)	OD (570)	ε(Oligo) in average	ε(Quasar570)	cf260	% DOL by spectrometry
set-A	Noc2l-IN12-570	0.65	0.336	198964	115000	0.07	0.96989
set-B	Gabbr1-IN5-570	0.7	0.345	208626	115000	0.07	0.966012
set-C	Gabbr1-IN11-570	0.495	0.262	193431	115000	0.07	0.967548
set-D	Noc2L-EX-570	0.769	0.406	195600	115000	0.07	0.975353
set-E	Noc2L-IN4-570	1.01	0.526	196188	115000	0.07	0.964377
set-F	Polr2a-ODD-570	0.068	0.0336	194561	115000	0.07	0.905971
set-G	Slc25a28-IN-570	0.054	0.0266	194583	115000	0.07	0.903174
set-H	Znrf3-IN-570	0.768	0.417	188945	115000	0.07	0.971515
set-I	Srsf2-IN-570	0.999	0.513	203545	115000	0.07	0.984472
set-J	Srsf2-EX-N-570	0.801	0.48	187517	115000	0.07	1.06886
set-K	Cstf1-IN5-570	0.639	0.339	192742	115000	0.07	0.966566
set-L	Rad9b-IN-570	0.294	0.1549	194261	115000	0.07	0.966896
set-M	Ptbp1-UTR-570	0.381	0.182	198982	115000	0.07	0.89381
set-N	Malat1-ODD-570	0.377	0.199	191925	115000	0.07	0.957632
set-O	Lexis-Stellaris-570	0.239	0.116	195831	115000	0.07	0.894891

## Sheet: Quasar-570-PAGE
Quasar570	% DOL by PAGE
Noc2l-IN12-570	0.943871
Gabbr1-IN5-570	0.937553
Gabbr1-IN11-570	0.943353
Noc2L-EX-570	0.955853
Noc2L-IN4-570	0.943177
Polr2a-ODD-570	0.883454
Slc25a28-IN-570	0.8747
Znrf3-IN-570	0.945258
Srsf2-IN-570	0.959617
Srsf2-EX-N-570	0.973815
Cstf1-IN5-570	0.943074
Rad9b-IN-570	0.940176
Ptbp1-UTR-570	0.883675
Malat1-ODD-570	0.929616
Lexis-Stellaris-570	0.88134
