# Supplementary material
Source: HighWire-hosted journal article supplement (doi:10.1101/rna.079591.123)
Supplement: Supplemental_Table_S4.xlsx [file Supplemental_Table_S4.xlsx]

## Sheet: probe set sequences(Quasar670)
Noc2l-exon-Quasar670	probe sequence	ε(Oligo)
Noc2l-ex-1	AGG AAC TCG TCC ACA CTG AG	196300
Noc2l-ex-2	GAA CTT GTA GAA CTC GGG GT	198200
Noc2l-ex-3	GAG TCA CTG AAG TCC AGT AG	203200
Noc2l-ex-4	AAC AGC CTG GGA CTA AGG TG	200700
Noc2l-ex-5	GGA ACG CCT GTA CAA CTT CA	192900
Noc2l-ex-6	CTG GAA CCT GCA AGT CTC AG	188600
Noc2l-ex-7	ACC AGA GCA TTG AAC ACA GC	201400
Noc2l-ex-8	ACA GAG GTC TCG AAT GCA GA	206500
Noc2l-ex-9	AAA CAG CAG CTT CTG AAG GC	197200
Noc2l-ex-10	TAT TGC TAT CCT TTG GTG TC	179100
Noc2l-ex-11	CAC AGT GGG CTA CTG GAT GG	193500
Noc2l-ex-12	TAG GTA TGT CTT GAC ATC CA	195400
Noc2l-ex-13	CTG ATA TGC TGC AGG ACA GC	191800
Noc2l-ex-14	TGT CAG GTA GTA AGG AAC CA	208700
Noc2l-ex-15	AAC ATT CGG CAC TGC TTA GG	190900
Noc2l-ex-16	ACA GAA CCA CCA TCC TCT TG	187500
Noc2l-ex-17	AGA CTC TGA TGA GTA CCA GG	202300
Noc2l-ex-18	CAA GGA AGG CTT CCT TCT TG	184600
Noc2l-ex-19	CAT GAT GTA CAT TTG CTT CA	190300
Noc2l-ex-20	TGC ATG AAG CTT ATG AGG GG	199900
Noc2l-ex-21	CAA GGC AAG CAT TTC AGT CA	198600
Noc2l-ex-22	CGT GCT GAT AGG AGA CGC TG	194100
Noc2l-ex-23	AAG CTG TCG GAT GTA GAG GA	209200
Noc2l-ex-24	GTT GTA CAC AGA CTG GTG TG	195700
Noc2l-ex-25	TAG AGG CAG TGC ACA TAC TG	200200
Noc2l-ex-26	TAC TCA GGA CTC GAC ACC AC	189300
Noc2l-ex-27	CAG GAT CTC ACT GGA ACC AA	197100
Noc2l-ex-28	TGA GAG AGG GTA GAG TAG CG	214700
Noc2l-ex-29	CTT GAT ACA GCC AAT GAT GA	200500
Noc2l-ex-30	ATA AAA TCG AGC AGT GGG CA	210700
Noc2l-ex-31	CGT ACA CAA TGC ATG CGC AA	196300
Noc2l-ex-32	TAT GAA GGT GCC GAT GGT CT	194500
Noc2l-ex-33	TCT CGA GAA TGA AGG GCA GG	203900
Noc2l-ex-34	TGA TGG GCT TGG AAC TCA TG	191300
Noc2l-ex-35	CAG GTA TTC CAG AGT AAG GT	204400
Noc2l-ex-36	TTT GCA CTC CCG GAG AAA AG	193900
Noc2l-ex-37	ATC TGG TCA GAC ACG CTG AA	197500
Noc2l-ex-38	TCT TCA CGA ACC TGC TTC TC	171400
Noc2l-ex-39	TGA TCT CTG GGA AGT TCA GG	194100
Noc2l-ex-40	CTC CTC TCT CAA AGA AGT CG	185100
Noc2l-ex-41	ATC CTC TGA ATC GCT GTC AC	181900
Noc2l-ex-42	CAC AGT TCG CTC AGA TCC AC	185300
Noc2l-ex-43	TTC TGA GAG CTG AAG ATC CT	192100
		195600
Polr2a-Exon-even-670	probe sequence	ε(Oligo)
Polr2a-2	CGT TGT TTC TGG GTA TTT GA	186200
Polr2a-4	CAT ACA ACT CTA GGC CAG AG	198200
Polr2a-6	TCA GCA AGA TCT TTT TCT CC	179900
Polr2a-8	CAC TGT GAC AAT CAT CCA CT	187400
Polr2a-10	CTG GGC TTA GGA TGG AAA CG	197700
Polr2a-12	CCA GGA AGA CAT CTC TCT TA	192800
Polr2a-14	CTG GGA GAT GTT GAT CTT GG	192200
Polr2a-16	AAC AGC CGT GTC AAT GAG AC	201600
Polr2a-18	CAT CAT ATT TCA CCA TCA CC	185400
Polr2a-20	TTC ACG CAT CCG TTC AAA TT	184500
Polr2a-22	GCA GAA GGT TAC AAG GGA GG	212500
Polr2a-24	TTG CTC AAT TCT TTG ACT CC	173600
Polr2a-26	ACC AGC ATA GTG GAA AGT GT	206900
Polr2a-28	TAG TAG ATG GCT GTA TTG GC	196700
Polr2a-30	CAA TCT GTT CCA TGG TAA GC	190000
Polr2a-32	CAT ATC TGT CAG CAT GTT GG	190300
Polr2a-34	GTC ATA GTG TCA CAC AGG AG	203800
Polr2a-36	CCC AGC ATA ATA TTC TCA GA	196700
Polr2a-38	AAG ATG GAG AGG TTG GGG AG	215700
Polr2a-40	TAG CTG GGA GAA GTT GGA GA	210000
Polr2a-42	TAG TTG GGA CTT GTA GGT GA	201200
Polr2a-44	GTG AGG TGG GGG AAT AAC TG	206600
Polr2a-46	AAG GAC TAG TTG GGG TGT AC	203700
Polr2a-48	CGG GGA GGT TGG AGA ATA TT	205300
		196621
ACTB-quasar670	probe sequence	ε(Oligo)
Actin-Exon-1	AGC GCA GCG ATA TCG TCA TC	193900
Actin-Exon-2	TAG GAG TCC TTC TGA CCC AT	186200
Actin-Exon-3	CTC TCT TGC TCT GGG CCT CG	163100
Actin-Exon-4	GCC ATG TTC AAT GGG GTA CT	191000
Actin-Exon-5	CTC CAT GTC GTC CCA GTT GG	178800
Actin-Exon-6	GCA GCT CAT TGT AGA AGG TG	199000
Actin-Exon-7	TTC ACG GTT GGC CTT AGG GT	183800
Actin-Exon-8	CTC AAA CAT GAT CTG GGT CA	194500
Actin-Exon-9	TAC GTA CAT GGC TGG GGT GT	192200
Actin-Exon-10	CTG TGG TAC GAC CAG AGG CA	197400
Actin-Exon-11	GTC TCC GGA GTC CAT CAC AA	191300
Actin-Exon-12	GTA GAT GGG CAC AGT GTG GG	202800
Actin-Exon-13	TCA TGA GGT AGT CTG TCA GG	197500
Actin-Exon-14	TTC CCT CTC AGC TGT GGT GG	174700
Actin-Exon-15	AGC ACA GCT TCT CTT TGA TG	184600
Actin-Exon-16	GCC ATC TCC TGC TCG AAG TC	177400
Actin-Exon-17	TTC TCC AGG GAG GAA GAG GA	206200
Actin-Exon-18	CCG CTC GTT GCC AAT AGT GA	187400
Actin-Exon-19	TGG AAA AGA GCC TCA GGG CA	203800
Actin-Exon-20	ATG GAT GCC ACA GGA TTC CA	198700
Actin-Exon-21	GTC ACA CTT CAT GAT GGA AT	196200
Actin-Exon-22	GCA TAG AGG TCT TTA CGG AT	198800
Actin-Exon-23	TAC CAC CAG ACA GCA CTG TG	192100
Actin-Exon-24	GTC AGC AAT GCC TGG GTA CA	194900
Actin-Exon-25	CCA GAG CAG TAA TCT CCT TC	186800
		190924
Gabbr1-Intron4-670	probe sequence	ε(Oligo)
Gabbr1-Intron4-1	CCG ACA TTC TTC ATA GCA AC	188100
Gabbr1-Intron4-2	AAG ATA GGT TTC ACC TGC AT	196900
Gabbr1-Intron4-3	TGG AAC CAA GTC TGA GGC AG	200200
Gabbr1-Intron4-4	AGT GAT ACA GAG GAT GTT CT	205500
Gabbr1-Intron4-5	TAG CAA AGG ACC AGT CCT AG	202000
Gabbr1-Intron4-6	CAG CAA TTC CAT TAT AGA GT	200400
Gabbr1-Intron4-7	ATA TCT CAC CGA CTT TTT CT	180100
Gabbr1-Intron4-8	CCC TTG AAT TAT CAC TGT TC	180600
Gabbr1-Intron4-9	AAG ACT CAG TCT TCT TCC AT	186400
Gabbr1-Intron4-10	ATT CCC TCA AGG AAT GAT CA	199400
Gabbr1-Intron4-11	GGG TAG CAA ACA CAA AAG CA	213100
Gabbr1-Intron4-12	AGA CAG CAA AGA GGC AAG CA	216200
Gabbr1-Intron4-13	GCT TAA TTC ATT CCA GGA GA	197700
Gabbr1-Intron4-14	GTT CTC CAA AGG TTG GTT AG	193500
Gabbr1-Intron4-15	GCT GTT TAA ATA CCT TAG TT	191000
Gabbr1-Intron4-16	AGC TGA GTT TTG TAG AGC TT	193700
Gabbr1-Intron4-17	TGT TCC AGC AAG TAA AGG GG	202300
Gabbr1-Intron4-18	GAG GAT AAG AGC AAG GCG GG	214100
Gabbr1-Intron4-19	TTC TAG GGC AGG CAC CCT CA	185400
Gabbr1-Intron4-20	CAC ACT AAA GGA AAG GAG GG	213700
		198015
Gabbr1-Intron5-670	probe sequence	ε(Oligo)
Gabbr1-in5-1	GGA AGG GTT TCT GAT CTC AC	190900
Gabbr1-in5-2	GTG AAG AGT GAG GGG ATG GG	212900
Gabbr1-in5-3	AGT AAC AGG ACA CCC ACA AC	204200
Gabbr1-in5-4	AAC TAG AAT GGG TGG TGG GA	210500
Gabbr1-in5-5	AAA CAG GTA GGA GAG GAG GG	221800
Gabbr1-in5-6	CGG AAA ACC GCG ATT TGG CG	192500
Gabbr1-in5-7	AGA AAG CTG AGT CCG AGA GG	210300
Gabbr1-in5-8	CAC GAA GGA GAG ATC TGG GA	210200
Gabbr1-in5-9	CAG GTA AAA CCT GGG TAG GG	204400
Gabbr1-in5-10	GTG AAC AGG GTC GAC GGA AC	203700
Gabbr1-in5-11	AGG TGA TGG GAG AAA GGG TC	212300
Gabbr1-in5-12	GAG AAG TGC AGC TTA GGA GA	211800
Gabbr1-in5-13	TTG CAG AAG GGG AGA ACT GG	205200
Gabbr1-in5-14	GAG CGA GAG CGA TGG GAA AG	213700
Gabbr1-in5-15	ATG GAG CGA GGA ACT AAG GG	212400
Gabbr1-in5-16	TGG GTA GGT TAG GAG AGG AA	215500
Gabbr1-in5-17	CAG AGC AAA GAG GGG AAG CG	213200
Gabbr1-in5-18	GGA TTT GGA AGG AGA GAG GA	218400
Gabbr1-in5-19	TCT GCC TAA GGA GAC TAG AG	200000
		208626
Gabbr1-Exon-670	probe sequence	ε(Oligo)
Gabbr1-ex-1	AGG GCG GAT GTA TAA TCT GG	203800
Gabbr1-ex-2	AAA TTG ATG GCC TTC ACC TG	188300
Gabbr1-ex-3	TCA ATC TCA TAG TCC ACA GG	194000
Gabbr1-ex-4	AAG ACT TGG AGC AGA TTC GG	203000
Gabbr1-ex-5	TGG ATA AGC TTG AGC TCG TA	197300
Gabbr1-ex-6	CAT ACA AGT ACT TGG TGG CT	192600
Gabbr1-ex-7	GGC ATG AGG ATG ATC TTG AT	199900
Gabbr1-ex-8	ACA ATA AGG TTC CAC ATC CG	198200
Gabbr1-ex-9	GGA TGG ATG TGT CCG AAA GA	208100
Gabbr1-ex-10	TTT TCG AAG AGT TTC ACC CG	186500
Gabbr1-ex-11	ATC CAG TGT TGA GGT GAA GA	207800
Gabbr1-ex-12	AAA GTG ATC TCA ATC CCA GC	196300
Gabbr1-ex-13	CTT GAC GCT TCA GGT TTT TA	182300
Gabbr1-ex-14	AAA GTC CCA CGA TGA TTC GA	202000
Gabbr1-ex-15	AAA AAC TTT CCG GGC TTC GG	188900
Gabbr1-ex-16	CAT ACT TCT TCC CAA AGA GC	187100
Gabbr1-ex-17	CAT ACC ACC CGA TGA GAA AC	199100
Gabbr1-ex-18	TTG ACG GGT CAT AGG TTT TG	192100
Gabbr1-ex-19	GTC ATC TCT TCT ACT GTA CA	184100
Gabbr1-ex-20	CAG GGT TCA GCA TGA CAA TC	196300
Gabbr1-ex-21	CAT GTT GGA AAT GCT TCG GG	191600
Gabbr1-ex-22	TTT CTC CAC AAA TTC CTG TG	179400
Gabbr1-ex-23	TGT TCA AGG CCA AAG CCA AG	198000
Gabbr1-ex-24	TGT AGT TAA AGT CCT CCA GG	195900
Gabbr1-ex-25	TTT GGT CTG TAA TGG TCT GG	186600
Gabbr1-ex-26	AAA GAC CAC GTG GCC AGA AA	209200
Gabbr1-ex-27	TAG TAG CCG ATC TTC TTG TA	191100
Gabbr1-ex-28	AAA GAT CAT CCT TGG TGC TG	192800
Gabbr1-ex-29	CGA TCC ACT TGT CTG TTT TG	176800
Gabbr1-ex-30	ACG GAA TGT CTT GAT GAC CA	199400
Gabbr1-ex-31	GCT GGG AGT TCT GGA TAT AA	201400
Gabbr1-ex-32	ACA GCA GTC AGA TTG TTC AG	200500
Gabbr1-ex-33	GCA GAC AAA TGG GAA CTG GC	202000
Gabbr1-ex-34	CTA AAG CCT AAG CCC AAG AG	200100
Gabbr1-ex-35	TAC AGT TTC CAA GGC TCT AG	191000
Gabbr1-ex-36	CAG ATG GCA AGA GTC AGG AT	207700
Gabbr1-ex-37	GGG CAG AAT GGA GAC ATC AA	212000
Gabbr1-ex-38	GAA AAT GCC GAG CCA TGT AT	201500
Gabbr1-ex-39	CAC TTT TGG TCT CAT AAG CA	188200
Gabbr1-ex-40	CTG TGG TCA TTG ATC TTT TC	178200
Gabbr1-ex-41	CGC AAC ATT GTA GAT AGC CA	200600
Gabbr1-ex-42	CAG GAG CGG TAA TGA GAC AC	206300
Gabbr1-ex-43	CTG GCT GGA AAG GAT CAT GG	197500
Gabbr1-ex-44	CAG AGA GGC AAA GGC GAA GG	213200
Gabbr1-ex-45	GCA TCT TAG GCA CAA AGA GC	199100
Gabbr1-ex-46	CAT TCA CCT CGA GTG ATC AA	193400
Gabbr1-ex-47	CTC ATT GTT GTT GGT GGA TG	186500
Gabbr1-ex-48	AAA TGT ACT CGA CTC CCA TC	189900
		195783
Malat1-even-670	probe sequence	ε(Oligo)
m-Malat1-2	AAC TTC ACA AAA CCT CCC TT	184600
m-Malat1-4	CAA CTC ATG CCT TCA AAC GT	185200
m-Malat1-6	TGG CAT CCA AAG TTG TCT TA	192000
m-Malat1-8	TAG CTT TGA TTG CTA GCT TC	180600
m-Malat1-10	CTC AAG GAA TGT TAC CGC AC	192200
m-Malat1-12	CAT CTA CCA TTC TTC TTT CT	171100
m-Malat1-14	GAG TGG ATT TCC TTT TTT CT	179300
m-Malat1-16	TCA GCG GCA ACT GGG AAA AC	197900
m-Malat1-18	TTA AAG CCA CTT CCT TTG TT	179500
m-Malat1-20	GGA ACA ATC TCT GGC TCA TG	190200
m-Malat1-22	TTT TAC TCC AGG CTT AAT GC	182000
m-Malat1-24	CTG CTC CGA GAT GGA ATG AA	198600
m-Malat1-26	CTA TTA GCT ATC CCA TCA TG	187800
m-Malat1-28	GCA CAA GTA CAT TGG AGC AC	200300
m-Malat1-30	AGA TGT TTA GCC ATG GTC AA	202100
m-Malat1-32	TGA CCT GAA GTC AAG ACA CC	196800
m-Malat1-34	TTA ATC ATA CTC CAG TCG CG	189300
m-Malat1-36	AGA CTA AAG GCT TCA GTG CT	196300
m-Malat1-38	AAA TGG CAT GTC TGC TTC AC	188000
m-Malat1-40	GGT CTC GAT ACA ATA CTG CT	190800
m-Malat1-42	TGG CGA TGT GGC AGA GAA AT	204000
m-Malat1-44	GGG GAA AAT TGA TGG CCT TT	196100
m-Malat1-46	CCA GCA CTG GTA TCA AAC AT	194800
m-Malat1-48	TCC ACT AAG ATG CTA GCT TG	189000
		190354
Ptbp1-3utr	probe sequence	ε(Oligo)
Ptbp1-3utr-1	GAA TGG TGG AAG CTG ATG CA	204700
Ptbp1-3utr-2	CAG CTG CTT TTT AAA GTG GC	184600
Ptbp1-3utr-3	AAT CTC TGG TCT GTA AGG TC	190800
Ptbp1-3utr-4	ACA GGT AAA CTG ATC TCT CT	192800
Ptbp1-3utr-5	GCA GAG TGG GCT AGA TTT AA	205500
Ptbp1-3utr-6	CAT GGT GCT GGG ATT GAC TG	189300
Ptbp1-3utr-7	AGA AAG CGG CTA TGT TTG GG	200600
Ptbp1-3utr-8	GAG GCA CGC TGG TTT GTA AG	195300
Ptbp1-3utr-9	CTT AGA GGG TGG GTG TAC GG	198600
Ptbp1-3utr-10	CAG GTC TAG AGA CAA CTG GT	200100
Ptbp1-3utr-11	ATT GGG GAG CCT ATG TAT AG	203200
Ptbp1-3utr-12	TTA TAA GGG TGT AGG GGA GT	209100
Ptbp1-3utr-13	GGG ACA TGG GAG AAT CAT GT	206800
Ptbp1-3utr-14	AAG GTC ACA ATG AGG CTC GG	201700
Ptbp1-3utr-15	CTG TGA CCA CAC GGA ATA GA	202000
Ptbp1-3utr-16	AAA TAT TGC TAG GCA CAG GT	203300
Ptbp1-3utr-17	ATT CGG GTA TTT GGT CAA GT	196300
Ptbp1-3utr-18	AGG GGA CAT AGA AGC TCA GA	214100
Ptbp1-3utr-19	CAA GTT GGT CAC TGG AAG GA	202700
Ptbp1-3utr-20	TCT CAG AGC TTT TTC TCC AG	177900
Ptbp1-3utr-21	TTT GAA GGT AGA AAC CCA CA	204700
Ptbp1-3utr-22	GAA AGC TAA ACT TTG GTC CA	198600
Ptbp1-3utr-23	TCA ACT GGG CAC AGT CAG AG	197900
Ptbp1-3utr-24	AGG ACA TTA AGG CCT AGA GG	209100
Ptbp1-3utr-25	GGA ACA GGC TAG GAT AGA GG	213700
Ptbp1-3utr-26	AGA ACC AGG GTG CAG GGA AC	207300
Ptbp1-3utr-27	ATA TTT ACA CTC TTC CAC GC	183400
Ptbp1-3utr-28	AGC CCC ACA GGT ATA AAA TC	202000
Ptbp1-3utr-29	TAA AAA ACT GCT GCA CCG CC	188300
Ptbp1-3utr-30	GGA CAA TAC TGA GCC TGT AG	200400
Ptbp1-3utr-31	CAA TAC ACC ATC TGG GAT GG	196400
Ptbp1-3utr-32	ACT GCT TTA ATG GAA AGC CC	191700
Ptbp1-3utr-33	CTC AGG GAA GAC AGA GGT TA	209200
Ptbp1-3utr-34	GCC TAC AGC TCA GAA TGA AG	200000
Ptbp1-3utr-35	GGT GTT TAT TGA ATC CAG GC	193000
Ptbp1-3utr-36	CAA TGA CAG GCA GGA GTG TA	208800
Ptbp1-3utr-37	TTT GGA AGA GCA GTC GGT AC	199100
Ptbp1-3utr-38	GTG GTT TGG ACT TGA ACT CA	191800
Ptbp1-3utr-39	CTT ATT ATG GTT GGC TGT GA	189700
Ptbp1-3utr-40	CAC ATC AGA AGA GGG CAT CA	206500
Ptbp1-3utr-41	AAG TAC ACT GTA GCT GAC CT	195200
Ptbp1-3utr-42	CTC ACT CAG GCA CAA AGA CT	191500
Ptbp1-3utr-43	TGT GGT TGT TGG GAA TGG AA	201100
Ptbp1-3utr-44	CTG ATA GAT GGT TGT GAG CC	194700
Ptbp1-3utr-45	ATG TGA GTA CAC CAT AGC TG	200700
		198982
Cstf1-intron5	probe sequence	ε(Oligo)
Cstf1-in5-1	ACA CTG GGA TCT CTT CTG AG	187800
Cstf1-in5-2	CTG AGG GTC TAC TTC ACA TA	192200
Cstf1-in5-3	GCT GGG CAA ATC CAA ACA TA	201400
Cstf1-in5-4	AGT AGA CAC CAC TCA CTG TA	199900
Cstf1-in5-5	TCT TAG CTG CTA GGG AAC AG	193900
Cstf1-in5-6	AGA GGT TTT CTA GCC CAA CA	196700
Cstf1-in5-7	AAG AGG AAC CAG TGG AAC CA	213900
Cstf1-in5-8	TTA ATG CGA GTC GCA CTC AC	188400
Cstf1-in5-9	TCC TGC GAG CTC TGA ATC TG	179700
Cstf1-in5-10	AAC TCA GCT CCT TGC AAT AC	186500
Cstf1-in5-11	CAC ACA GAG GAA CTG TGC TG	196000
Cstf1-in5-12	CCT GGT TCT AAG ACA TCA CA	192600
Cstf1-in5-13	TGA ACA CTT CTG CAT GCC AG	185900
Cstf1-in5-14	ACC GAA AGC TTT CTC ATT CA	189800
Cstf1-in5-15	GAA GCA AGG GCT GTC ACT TG	194500
Cstf1-in5-16	TAG CAC TTC GGA ACA TGT CT	189600
Cstf1-in5-17	AAA TAA GCA CCC TAA GCT CC	195900
Cstf1-in5-18	GGA ACG TGT CTA TAT ATT CC	195400
Cstf1-in5-19	CAG GGA GCT GAC TTA GGA AT	201400
Cstf1-in5-20	GCA AGA ACA CTC TGC TTT CT	182900
Cstf1-in5-21	CCA TGA ACT CAG CAC ATC TA	193200
Cstf1-in5-22	GCC CAT TTA CTG ACT AAG AC	191100
Cstf1-in5-23	CCT TGT AAA TTC TGG CTC AC	180200
Cstf1-in5-24	TTT TAT AAC CAA CTG TCC CC	182100
Cstf1-in5-25	GAA AGA CAC CAC CAG TTC TC	194700
Cstf1-in5-26	TTG TAG ACA GTT TGA TGA GC	198600
Cstf1-in5-27	CCA ATA AAA CAA CAG TCC CT	197500
Cstf1-in5-28	GGG CTG ACT TTT TCA AAC TT	182600
Cstf1-in5-29	TTA CCA AAT GAC TTA GCA GT	197700
Cstf1-in5-30	GAC CTG ACA ATT ACC TTT CT	184100
Cstf1-in5-31	TGT GTG CAC GGA CAG ACT TA	196000
Cstf1-in5-32	TAA GTT CCA GTG ACT CTC AG	192000
Cstf1-in5-33	TTC TGC AGT GAA CTG TGA GT	190900
Cstf1-in5-34	AAA GGC TGC GTG TAG TGA TG	201800
Cstf1-in5-35	AAG GAG ATG CTA CCA GGA GA	213900
Cstf1-in5-36	GTG ACA AAC GAG TCT CAG CA	201900
Cstf1-in5-37	TCT AGT GTC TAC TCT CTC TG	175400
Cstf1-in5-38	CAT AGT TAG CGG GGT AGA TG	205000
Cstf1-in5-39	CAC GGC TAT GGA GGA AAG AC	204300
Cstf1-in5-40	GAA ACC AGA AGT CAC ACG CC	200000
Cstf1-in5-41	ACA TAC TGC ACA CGC ACT TC	186000
Cstf1-in5-42	TCA TGA TGG CCT CCC AAA TA	192100
Cstf1-in5-43	GCT GGT TCA TGT TTA AAG CA	194300
Cstf1-in5-44	GCT TGT AGC CAC TGA ACA AT	192300
Cstf1-in5-45	TAA TGA TCC TTT TGC TGC TG	179700
Cstf1-in5-46	TGT TTG TTC ACT CTG GTC AC	176800
Cstf1-in5-47	TGA TGA TGT GAG GTC GCC TC	189200
Cstf1-in5-48	TGT CAC ACG AAC CAA CAC GT	193800
		192742
Srsf2-exon	probe sequence	ε(Oligo)
Srsf2-N-ex-1	GAG GTC ATG CCC TCC ACA TC	183700
Srsf2-N-ex-2	TAG GTC AGG TTG TCC ACC TT	185400
Srsf2-N-ex-3	CAG GGT GTC GGG CGA GGT GC	191600
Srsf2-N-ex-4	CGT ATT TCT CGA AGA CGC GC	186400
Srsf2-N-ex-5	ATG TAC ACG TCG CCG ACG CG	189600
Srsf2-N-ex-6	CTT GGT GTA GCG GTC CCG CG	179800
Srsf2-N-ex-7	CGA AGG CGA AGC CCC GGG AC	193400
Srsf2-N-ex-8	TCG CGC TTG TCG TGG AAC CG	180600
Srsf2-N-ex-9	GGC GTC CAT GGC GTC TTC GG	179900
Srsf2-N-ex-10	ATC TGC ACC CGC AGC TCG CG	177300
Srsf2-N-ex-11	CCG GCT TCG AGA TCG GCT GC	178300
Srsf2-N-ex-12	GGC TTC GCG ACC TGG ACC GA	184300
Srsf2-N-ex-13	TTG GAG CGG CTG TAG CGG GA	194900
Srsf2-N-ex-14	CGA GCG AGT GCG GGA CCG AG	197600
Srsf2-N-ex-15	ACT TGG AGG TTG ATC TGG AG	197900
Srsf2-N-ex-16	TTG GAT CTT CGG GCA GAT CT	185900
Srsf2-N-ex-17	GGA GAC GGA GGA GGA CTT GG	207700
Srsf2-N-ex-18	ACC TTG ACC TCG AGC GGG AT	188500
Srsf2-N-ex-19	GAG GGC TTC TCG ATC GCG AC	185800
Srsf2-N-ex-20	GAC TCT CGC TTC GAC ACG GG	182200
Srsf2-N-ex-21	CTT GGA CCG CGA CCT AGA CT	183800
Srsf2-N-ex-22	CTT CTG GAG ACT TGG GTG GG	187200
Srsf2-N-ex-23	TAG GAA GAA ACT GCT CCC TC	191100
		187517
Gapdh-Exon-stellaris	probe sequence	extinction coefficient
Gapdh-ex-1	CTG ATG AAC CTA AGC TGG GA	197800
Gapdh-ex-2	CGA GGA AAC ACT CTC CTG AG	193700
Gapdh-ex-3	CTT CAC CAT TTT GTC TAC GG	178400
Gapdh-ex-4	AAT ACG GCC AAA TCC GTT CA	197700
Gapdh-ex-5	CAC TTT GCC ACT GCA AAT GG	184000
Gapdh-ex-6	GGT CGT TGA TGG CAA CAA TC	195000
Gapdh-ex-7	GAC CAT GTA GTT GAG GTC AA	204600
Gapdh-ex-8	GTG AGT GGA GTC ATA CTG GA	205400
Gapdh-ex-9	TTG ACT GTG CCG TTG AAT TT	183600
Gapdh-ex-10	TTG ATG ACA AGC TTC CCA TT	186600
Gapdh-ex-11	TGG AAG ATG GTG ATG GGC TT	198300
Gapdh-ex-12	ATT TGA TGT TAG TGG GGT CT	194500
Gapdh-ex-13	AGT AGA CTC CAC GAC ATA CT	199000
Gapdh-ex-14	TTC TCC ATG GTG GTG AAG AC	190900
Gapdh-ex-15	AGA AGG GGC GGA GAT GAT GA	217200
Gapdh-ex-16	ATC ACA AAC ATG GGG GCA TC	200200
Gapdh-ex-17	CAT ATT TCT CGT GGT TCA CA	186700
Gapdh-ex-18	GCT GAC AAT CTT GAG TGA GT	196000
Gapdh-ex-19	CTA AGC AGT TGG TGG TGC AG	195200
Gapdh-ex-20	AGT TGT CAT GGA TGA CCT TG	193800
Gapdh-ex-21	TCA TGA GCC CTT CCA CAA TG	185200
Gapdh-ex-22	TCT TCT GGG TGG CAG TGA TG	186500
Gapdh-ex-23	GAT GCA GGG ATG ATG TTC TG	197600
Gapdh-ex-24	TCA GCT CTG GGA TGA CCT TG	183600
Gapdh-ex-25	TAG GAA CAC GGA AGG CCA TG	205100
Gapdh-ex-26	AGA TCC ACG ACG GAC ACA TT	199600
Gapdh-ex-27	TCA TAC TTG GCA GGT TTC TC	181300
Gapdh-ex-28	CTT CAC CAC CTT CTT GAT GT	173900
Gapdh-ex-29	AGA CAA CCT GGT CCT CAG TG	192200
Gapdh-ex-30	GAG TTG CTG TTG AAG TCG CA	194600
Gapdh-ex-31	CGG CAT CGA AGG TGG AAG AG	206400
Gapdh-ex-32	TTG TCA TTG AGA GCA ATG CC	192200
Gapdh-ex-33	ACC AGG AAA TGA GCT TGA CA	206200
Gapdh-ex-34	CTG TAG CCG TAT TCA TTG TC	184000
		193735

## Sheet: Quasar670-vis
	probe-set name	OD (260)	OD (670)	ε(Oligo) in average	ε(Quasar670)	cf260	% DOL by VIS
set-I	Actb-Exon-670	0.08	0.103	190924	280000	0.04	0.969208
set-II	Srsf2-Exon-670	0.082	0.107	187517	280000	0.04	0.96626
set-III	Gabbr1-Intron4-670	0.261	0.329	198015	280000	0.04	0.98145
set-IV	Gabbr1-Intron5-670	0.393	0.452	208626	280000	0.04	0.937029
set-V	Gapdh-Exon-670(Stellaris)	0.216	0.281	193735	280000	0.04	0.993648
set-VI	Noc2L-Exon-670	0.062	0.076	195600	280000	0.04	0.941898
set-VII	Polr2a-Exon-even-670	0.087	0.118	196621	280000	0.04	1.05317
set-VIII	Gabbr1-Exon-670	0.479	0.598	195783	280000	0.04	0.961059
set-IX	Malat1-even-670	0.704	0.891	190354	280000	0.04	0.949149
set-X	Ptbp1-UTR-670	0.319	0.367	198982	280000	0.04	0.895785
set-XI	Cstf1-Intron-670	0.433	0.517	192742	280000	0.04	0.903428

## Sheet: Quasar670-PAGE
Quasar670	% DOL by PAGE
Actb-Exon-670	96.1
Srsf2-Exon-670	93.2
Gabbr1-Intron4-670	96.6
Gabbr1-Intron5-670	91.4
Gapdh-Exon-670(Stellaris)	94.5
Noc2L-Exon-670	91
Polr2a-Exon-even-670	97.9
Gabbr1-Exon-670	93.8
Malat1-even-670	92
Ptbp1-UTR-670	88.2
Cstf1-Intron-670	87.4
