# Supplementary material
Source: HighWire-hosted journal article supplement (doi:10.1101/rna.079591.123)
Supplement: Supplemental_Table_S6.xlsx [file Supplemental_Table_S6.xlsx]

## Sheet: probe-sequences(ATTO565)
Akap8I-Exon	probe sequence	ε(Oligo)extinction coefficient
Akap8I-ex-1	GAC AAA ACC TGT GTA GCT CA	198700
Akap8I-ex-2	TGC AAA GTG GTT TCG GAT CC	190100
Akap8I-ex-3	CAC TGG TGT CAC AGT ACG TA	195800
Akap8I-ex-4	CCA TAT CCA TAA TCA CAG GT	197000
Akap8I-ex-5	TAT TTG TCC CAG AGT TCC AA	191500
Akap8I-ex-6	TTT CCC AAG AGT GTG AAG TG	197200
Akap8I-ex-7	TGC ATT TGT GTC AGA GCT AG	192500
Akap8I-ex-8	AAA ACG GAA TCG GCA CTG GC	199200
Akap8I-ex-9	ATC ATA TCT AAG CGC TGG TT	192800
Akap8I-ex-10	CCT CAT AGG AGT CAT ATC TC	190900
Akap8I-ex-11	TCA TAG CTT GAC CGG TAG AG	197500
Akap8I-ex-12	ATT TCC ATC TCA GGG TCA AG	192700
Akap8I-ex-13	CAT CAT ATT GGC CCT CAT AG	189200
Akap8I-ex-14	CAT TCG AAA CTG GTC ACG GT	191300
Akap8I-ex-15	TTG GAC CAA ATG TAT CTC CT	187800
Akap8I-ex-16	CCT GGA ACA TGC CAT ACT CG	186700
Akap8I-ex-17	GCC AAA TCC AAA GCC AAA TC	198100
Akap8I-ex-18	TAC GCC TCA TCT GCT TCA TG	176200
Akap8I-ex-19	ACA AAC TGG ATC CTT TCC AC	187100
Akap8I-ex-20	TCC GGT ATT TGC AGA GAG AA	203000
Akap8I-ex-21	TAC CCA TCT CAT CCT CAT AG	184300
Akap8I-ex-22	TGT GGA ACT TGC TGT CAA GG	191300
Akap8I-ex-23	CTT GGT GCC TAC ATA TTT GA	187600
Akap8I-ex-24	GAA GTC AGC AGT TTG CTT TG	191100
Akap8I-ex-25	TCT TGT TGG TGA CAT ATT CC	183800
Akap8I-ex-26	ACA GTT TTT CGG AGC TCC TC	180900
Akap8I-ex-27	TGG ATC AGA CCA TCA AGG TC	198000
Akap8I-ex-28	GAT CTT GGT CTC TGT AGA TT	187800
Akap8I-ex-29	CTC CAT AGC AAT CTC TTG GG	183900
Akap8I-ex-30	GCC TCT ACC TTC TTC ACA AA	179800
Akap8I-ex-31	GAA AAG GTC ACA GGC TGC AC	199900
Akap8I-ex-32	ATG ATT CCA AAC TGC ATG GG	196500
Akap8I-ex-33	TGA TCC ATC GTC TTG AGA TG	191000
Akap8I-ex-34	CCA TAA GCG AGG ACT TCT TG	191300
Akap8I-ex-35	GTT GTT GAG AAT ACT GCG GG	197200
Akap8I-ex-36	TCC AGC TTC TTG CTA ATG AG	184100
Akap8I-ex-37	GTC AGT GAA AGG ATT CTC GC	195800
		191341
Cstf1-Exon	probe sequence	ε(Oligo)extinction coefficient
Cstf1-ex-1	AAA CCC ACT TTG GTT CTG TA	189000
Cstf1-ex-2	ATG ATC AGC TTG TAG AGC TG	197700
Cstf1-ex-3	TAA CCG TCG TAG AGC AGC TG	195400
Cstf1-ex-4	TGA GGC CAT TGG CGA TAC TA	196200
Cstf1-ex-5	CGA CTG GGG CTT GAT CTC AT	183300
Cstf1-ex-6	TTG ATG AGA TGC AGG AGC TG	200300
Cstf1-ex-7	CAG TGT CAT CGT TCT CCA TC	180200
Cstf1-ex-8	CAG AGC GAC CAA TGG CAT AC	198900
Cstf1-ex-9	ATC AAA CTC CAG GTC GAT CC	192300
Cstf1-ex-10	GGT GAC ATT GTT TGA ACG TC	192600
Cstf1-ex-11	AGG TTT CAT ACT CGG AAG CC	193600
Cstf1-ex-12	GCC TTT GTG GGA AGT GAC AT	192900
Cstf1-ex-13	CAG ATC CTG TGG CTA TCA AC	188700
Cstf1-ex-14	CCA GTA TCT TTA TGG AAG CA	197800
Cstf1-ex-15	TTT GGC CAA CAT TCT TTC TG	176600
Cstf1-ex-16	CAT GAC CTC AAT TGG CAT GG	190300
Cstf1-ex-17	TTC TGT TGT GCA GTC TCA TT	178200
Cstf1-ex-18	GGT CGT AAA GAG TTC GGA TC	201700
Cstf1-ex-19	AAG ACA CGT GAC TTC ATC CA	198100
Cstf1-ex-20	GAT CTG TTC TGT TGG GTG AA	192000
Cstf1-ex-21	CAG AGT ATA ATC CCT TGA GC	196300
Cstf1-ex-22	CTC TTT TTG CAG ACG GTT TG	177900
Cstf1-ex-23	GGC TTC CTG AAT GTA TTT GA	190600
Cstf1-ex-24	GTG GAA AGA GAT GGA ACG CA	214500
Cstf1-ex-25	ACC AGG ATG AAG TCT CCA GA	204200
Cstf1-ex-26	GAA GCG TGG GAT GCT GAG TT	198000
Cstf1-ex-27	CAC TGG AAG GTG TTG ATG TC	193700
Cstf1-ex-28	TTA ACG GAG CAG ATG GCA TC	199100
Cstf1-ex-29	GAC GTA CAT GTT GGC ACT AG	196900
Cstf1-ex-30	TGA TGC AGC GGT TGG AGA CG	197100
Cstf1-ex-31	CAT CGT GAG CCT TCT CAA AG	188200
Cstf1-ex-32	TGG AAA TCT CCC AGA GTT TC	190300
Cstf1-ex-33	GTC CGG CAG CAA AAT ATA GT	203100
Cstf1-ex-34	CTA TGC AGC GCA CGA TGT TG	188400
Cstf1-ex-35	ACG TCA TGA AGC CAG GGT TG	198400
Cstf1-ex-36	AAC CGA GCT CGG AAG TCA TC	196400
		193581
Noc2l-Exon	probe sequence	ε(Oligo)extinction coefficient
Noc2l-ex-1	AGG AAC TCG TCC ACA CTG AG	196300
Noc2l-ex-2	GAA CTT GTA GAA CTC GGG GT	198200
Noc2l-ex-3	GAG TCA CTG AAG TCC AGT AG	203200
Noc2l-ex-4	AAC AGC CTG GGA CTA AGG TG	200700
Noc2l-ex-5	GGA ACG CCT GTA CAA CTT CA	192900
Noc2l-ex-6	CTG GAA CCT GCA AGT CTC AG	188600
Noc2l-ex-7	ACC AGA GCA TTG AAC ACA GC	201400
Noc2l-ex-8	ACA GAG GTC TCG AAT GCA GA	206500
Noc2l-ex-9	AAA CAG CAG CTT CTG AAG GC	197200
Noc2l-ex-10	TAT TGC TAT CCT TTG GTG TC	179100
Noc2l-ex-11	CAC AGT GGG CTA CTG GAT GG	193500
Noc2l-ex-12	TAG GTA TGT CTT GAC ATC CA	195400
Noc2l-ex-13	CTG ATA TGC TGC AGG ACA GC	191800
Noc2l-ex-14	TGT CAG GTA GTA AGG AAC CA	208700
Noc2l-ex-15	AAC ATT CGG CAC TGC TTA GG	190900
Noc2l-ex-16	ACA GAA CCA CCA TCC TCT TG	187500
Noc2l-ex-17	AGA CTC TGA TGA GTA CCA GG	202300
Noc2l-ex-18	CAA GGA AGG CTT CCT TCT TG	184600
Noc2l-ex-19	CAT GAT GTA CAT TTG CTT CA	190300
Noc2l-ex-20	TGC ATG AAG CTT ATG AGG GG	199900
Noc2l-ex-21	CAA GGC AAG CAT TTC AGT CA	198600
Noc2l-ex-22	CGT GCT GAT AGG AGA CGC TG	194100
Noc2l-ex-23	AAG CTG TCG GAT GTA GAG GA	209200
Noc2l-ex-24	GTT GTA CAC AGA CTG GTG TG	195700
Noc2l-ex-25	TAG AGG CAG TGC ACA TAC TG	200200
Noc2l-ex-26	TAC TCA GGA CTC GAC ACC AC	189300
Noc2l-ex-27	CAG GAT CTC ACT GGA ACC AA	197100
Noc2l-ex-28	TGA GAG AGG GTA GAG TAG CG	214700
Noc2l-ex-29	CTT GAT ACA GCC AAT GAT GA	200500
Noc2l-ex-30	ATA AAA TCG AGC AGT GGG CA	210700
Noc2l-ex-31	CGT ACA CAA TGC ATG CGC AA	196300
Noc2l-ex-32	TAT GAA GGT GCC GAT GGT CT	194500
Noc2l-ex-33	TCT CGA GAA TGA AGG GCA GG	203900
Noc2l-ex-34	TGA TGG GCT TGG AAC TCA TG	191300
Noc2l-ex-35	CAG GTA TTC CAG AGT AAG GT	204400
Noc2l-ex-36	TTT GCA CTC CCG GAG AAA AG	193900
Noc2l-ex-37	ATC TGG TCA GAC ACG CTG AA	197500
Noc2l-ex-38	TCT TCA CGA ACC TGC TTC TC	171400
Noc2l-ex-39	TGA TCT CTG GGA AGT TCA GG	194100
Noc2l-ex-40	CTC CTC TCT CAA AGA AGT CG	185100
Noc2l-ex-41	ATC CTC TGA ATC GCT GTC AC	181900
Noc2l-ex-42	CAC AGT TCG CTC AGA TCC AC	185300
Noc2l-ex-43	TTC TGA GAG CTG AAG ATC CT	192100
		195600
ZPF598-Exon	probe sequence	ε(Oligo)extinction coefficient
Zfp598-ex-1	ATC TTG GTA GAG CAC CGG TA	199500
Zfp598-ex-2	GCA AAA GCA GGG AGT TTC TT	198100
Zfp598-ex-3	ACA ATG CAA ACA CCT TTC CA	193700
Zfp598-ex-4	AAG AGG CTG AAG GGT GGC AG	208500
Zfp598-ex-5	AAC TTG CAG CAG AAG AGC TC	198400
Zfp598-ex-6	AGA TCT TGA GGT GCT TGA GG	197700
Zfp598-ex-7	AGT ACC ACT TGC GTT CAT AG	193300
Zfp598-ex-8	GAT GGG ATG TAT CAT CAG GG	204900
Zfp598-ex-9	GTC ACA GAA GTG GCA GAA GT	208000
Zfp598-ex-10	AGT CAC TAT AGT AGT CCT GG	199000
Zfp598-ex-11	GAA GTG CTC ACG CAG GTA GG	199700
Zfp598-ex-12	TCA CAC AGG AAG TGC TTC TC	187800
Zfp598-ex-13	CGG AAG GCA TGG GTG AAC TG	199700
Zfp598-ex-14	CTG TTT TAT GAG CCT TGA GG	186900
Zfp598-ex-15	AAG GTC AAT CTG CCG GTT CT	187800
Zfp598-ex-16	TGC CGT GGT GCA AAG CTA AA	196700
Zfp598-ex-17	TAG TCC TCA CCA CTG ACG AC	185600
Zfp598-ex-18	AGT CTC CTC TTG CTG TTG AG	179400
Zfp598-ex-19	CAT TTG CTG AGG CTT CCT TG	175600
Zfp598-ex-20	GAA GGC TTC TTG GCT TAC AG	188600
Zfp598-ex-21	CAG GAT AAG CCA GTG CCA AG	202500
Zfp598-ex-22	CTT CCT GGA AGG TGT TCT TG	180700
Zfp598-ex-23	TTC CAA GCT GAG ATG AGA CT	196400
Zfp598-ex-24	CAA CAG TGG GGA TGA TGT GG	203200
Zfp598-ex-25	AGA GGG CTT TGG GGT ATG AT	201200
Zfp598-ex-26	ACT TCA GCT TTG CTC AAA GG	187300
Zfp598-ex-27	TGT CCA TTG ACA ACG ATG GT	193500
Zfp598-ex-28	TGG AAA GTC CTC CTG TGG TA	192300
Zfp598-ex-29	AAG AGT ACC ACG GTG CTG AA	205500
Zfp598-ex-30	CTA AGT AGG CTT GTG GTG TG	193200
Zfp598-ex-31	TCT CTC CCG GAA ATT CTC AG	181300
Zfp598-ex-32	GAT AGA CTG GAT AAG CTG CA	206100
Zfp598-ex-33	CTC ATC GCT TTG CAG AAA GT	187700
Zfp598-ex-34	CCC GAA TGG CTT TTA AAC TT	184500
Zfp598-ex-35	AGA TCA TCC CCT GTC TGA AC	187600
Zfp598-ex-36	GCA GCT CTT GTA GTA CTG AG	191800
Zfp598-ex-37	TGG AAG CTC TCT CCA AGC AG	188500
Zfp598-ex-38	AGA AGT CTG TGT GTG CAG AC	199800
Zfp598-ex-39	ATC TGG AGT TGG GAG GCT TC	191800
Zfp598-ex-40	CAC ATT CTT CTT GTT CCT CT	167800
Zfp598-ex-41	GAA GGG AGG GGA AGT CAT CG	211200
Zfp598-ex-42	CGT AAT GAT CCT GGC AAT GG	194600
		193748
Neil3-Exon	probe sequence	ε(Oligo)extinction coefficient
Neil3-ex-1	CTT AGC ATT CAT TGG AGC AG	193000
Neil3-ex-2	ACA GTC TCA AGA GTT TCC AG	197400
Neil3-ex-3	ACG CCA CTG TAA ACA TAT CC	193800
Neil3-ex-4	ATA AAC AGC TCC TTC CCT AA	191600
Neil3-ex-5	GTA AAG CTC TGG GGC CAA AG	198800
Neil3-ex-6	GCC TTT CAT TCC GAA ATG AA	192000
Neil3-ex-7	TCC CGT GGG TTA ATC AAG AT	194900
Neil3-ex-8	CTT CCA TCA CTC TGA CTC TC	169800
Neil3-ex-9	CTT TGG TGA ACA TAT ATC CA	196000
Neil3-ex-10	CTC TCT GCT CTT GAG AAA CT	178300
Neil3-ex-11	CGG ATG AAG ACC ACT GTC AA	201000
Neil3-ex-12	TGT CTG ATA GTT GAC ACA CC	191300
Neil3-ex-13	AAT GCT GAA ATC CCG AGT CA	200000
Neil3-ex-14	GCT TTA CAG CAC CTG TAG AA	195000
Neil3-ex-15	CAG TGT TTA GAA ATG GCA GA	207300
Neil3-ex-16	GAT CAC AGT TAG GAC GCT TG	196500
Neil3-ex-17	CAC AGT AAT TTT GCT GTG GC	186800
Neil3-ex-18	AGC TGG CAT ACT TGA ACA CA	198200
Neil3-ex-19	TGA GTC CGT AAA GCA ATC CT	194700
Neil3-ex-20	CAA ACC ACA CAG GAC CAC TG	195300
Neil3-ex-21	CCG AGG GTC TGT TTA TGA GA	196900
Neil3-ex-22	TGG TCA AGC AAG CAT CAC AG	199800
Neil3-ex-23	TTG AGC ACT GAA TCC AGA GG	198800
Neil3-ex-24	AGG CAA TGG AAT TTT CTC TA	197500
Neil3-ex-25	AGG GTA CTT CAC TAA GTT GT	196700
Neil3-ex-26	CAG TTT TCC TGT TGA TCT TT	175900
Neil3-ex-27	AAC AAG GGT CGT ATT TCC AA	202700
Neil3-ex-28	GCC AAA GCA CTG GAT TTA TT	193600
Neil3-ex-29	GCT GTG AAT CAC TAA AAC CT	194000
Neil3-ex-30	GTT TAT TCC TTC TTT GGA GG	182300
Neil3-ex-31	CCT TAT TGG ATG GTT GAG TT	189400
Neil3-ex-32	GAC TGG GCA CAA ACT GTA GG	199600
Neil3-ex-33	AGT CCA GAG TTG TAA CTT TT	194900
Neil3-ex-34	TGG TTT GGA GTT CAC TGT TA	190600
Neil3-ex-35	ACT TTT GGA ATG ATG GCC AC	191500
Neil3-ex-36	GTG GTG CAT CTT GCA CAG AG	192600
Neil3-ex-37	TTC CTC ACA ACT CGG AGA AC	188800
Neil3-ex-38	TCG GCA GAG AAC AGG CAT AA	208700
Neil3-ex-39	AAA AAA TCC GCA CTG TGC TC	192100
Neil3-ex-40	CTT GCC ATG TCT GCA GAA CG	184100
Neil3-ex-41	TCT TCA GCA CAG TTT TCA TA	188300
Neil3-ex-42	ATT CTT CCC ATT ATT AGG TC	186100
Neil3-ex-43	CAT TTT CGG CCC ACT GGA AA	187100
Neil3-ex-44	CTG GAA CAA TTT CCA TTC CT	183000
		192880
Slc25a28-Exon	probe sequence	ε(Oligo)extinction coefficient
Slc25a28-ex-1	CAT GTG CGT GGT GAC AGT GG	193900
Slc25a28-ex-2	ATC GGG TAC ATC ACG CAA TG	198600
Slc25a28-ex-3	CAA CAC GTT CCG ATA GCG GG	193400
Slc25a28-ex-4	CTC ATG ATT CTC CAG AGA GC	189500
Slc25a28-ex-5	CTG TTG CTG TGA CGT TCA GC	179100
Slc25a28-ex-6	CAG GCA AAA TAG AGG GCG TG	207500
Slc25a28-ex-7	CCA TTG GCA ATA TGG CTA TT	190200
Slc25a28-ex-8	TGA AGT AAT GTC GCC ACA CA	200100
Slc25a28-ex-9	TTG ACG ACT TCC GCT GGA TT	181400
Slc25a28-ex-10	TAC GGC GAG TTG TAC ATC TG	192600
Slc25a28-ex-11	CGA ACA CAG TCT GTC ACG CG	189500
Slc25a28-ex-12	CGT GTA GCT GCG GTA AAA GG	199500
Slc25a28-ex-13	AAG GGG ACA TTC ATG GTC AG	204600
Slc25a28-ex-14	AGG TCA TGA AGT GAA TGG CT	204100
Slc25a28-ex-15	GTT AAA GTG CTC TTG CAG GA	196100
Slc25a28-ex-16	CAC AGA GCA CAT GGG AGC TG	198600
Slc25a28-ex-17	TTT ACA AAC GTC CAG TGG GG	195300
Slc25a28-ex-18	GAT TCC TGG GTG TTG AGC AG	192200
Slc25a28-ex-19	CTG TGA TGT GTC CAG TAA TG	194000
Slc25a28-ex-20	CTT GAT AGA CCG TCC TGA AG	192900
Slc25a28-ex-21	CTC GGA AGT AAG CAG TCA CC	195800
Slc25a28-ex-22	GTG GAG GGG ATC TGG TAA AT	205400
Slc25a28-ex-23	CAT ACA CAG ACC ATG CGA TG	198400
Slc25a28-ex-24	CCG CTT TGT GAT TAG GTA TT	186700
		194975
Rad9b-Exon	probe sequence	ε(Oligo)extinction coefficient
Rad9b-ex-1	TTC CCA AAT ACT TTC ACC TG	180800
Rad9b-ex-2	ACT CGT GAT AGC GTT TGT AC	192000
Rad9b-ex-3	CTT TCT CGG ATG GGT CTA GC	180700
Rad9b-ex-4	ATT CAC AGA TCT CAG AGC AA	203900
Rad9b-ex-5	GTA GCC ATA CGT GGA ATG AC	201700
Rad9b-ex-6	AGG GTG ACC ACT GAT AAT GT	202400
Rad9b-ex-7	AGT CAG TAT CAC TCA TCG TG	195500
Rad9b-ex-8	GAC TTT ATT GCC AAT TTG CA	188400
Rad9b-ex-9	CAG ACA TCT AAA GAT TGG CA	204600
Rad9b-ex-10	TCC ACA CTT CTT TCA AGG TA	186200
Rad9b-ex-11	TGA CGA CTC TGC ATT TAT CC	182300
Rad9b-ex-12	AAT ACC ATG CTT GCC GAA GA	199200
Rad9b-ex-13	ATT CGC ACA CAG ACT CTT TT	184600
Rad9b-ex-14	ATG TCA GAA GAG CAA TGG CC	204100
Rad9b-ex-15	GCA AAA GTT CCC TGG AGT AA	202200
Rad9b-ex-16	AAT TCC CCA CTC AAA CTC TT	181700
Rad9b-ex-17	ACA CAG AGC TGG TCA AAT CC	197700
Rad9b-ex-18	CGG GCC AAA AGA CAT CTC AC	194000
Rad9b-ex-19	CCC TTC AGT TCT TTA AAG CA	184900
Rad9b-ex-20	TCA CTT CTG AGA AGG TGA GG	198200
Rad9b-ex-21	AAG TAG ATG GCT AGA GGT GC	207800
Rad9b-ex-22	CAA CCG GTT TTC CAG GAA AG	195200
Rad9b-ex-23	GAG CAT GTC TTC AAC ACT CA	192100
Rad9b-ex-24	GTG GCC AAG ATA AAG TTT GC	199600
Rad9b-ex-25	GTT CTA CTC GGA TAA TCC AC	189400
Rad9b-ex-26	GAA AGG GGC AGT AAC TGT GG	206600
Rad9b-ex-27	TGG ACT GTA TGG GGT GTG AC	195000
Rad9b-ex-28	TCT GAC TGA CTC TGC TTT TA	177700
Rad9b-ex-29	TGC TCG AGA GAT GCT CTC TG	183800
Rad9b-ex-30	TCT TGG TTT CAG CTG CAG AG	185100
Rad9b-ex-31	TTC AGG CAC TTC GAA GAT GT	192700
Rad9b-ex-32	TTC CTC CAT GTC ACT AAC AA	187200
Rad9b-ex-33	GCT GTT CAC AAG ATA CAG CT	193700
Rad9b-ex-34	CTC ACT GTC GCT TGC TAC TG	171800
		192435
Gabbr1-Exon	probe sequence	ε(Oligo)extinction coefficient
Gabbr1-ex-1	AGG GCG GAT GTA TAA TCT GG	203800
Gabbr1-ex-2	AAA TTG ATG GCC TTC ACC TG	188300
Gabbr1-ex-3	TCA ATC TCA TAG TCC ACA GG	194000
Gabbr1-ex-4	AAG ACT TGG AGC AGA TTC GG	203000
Gabbr1-ex-5	TGG ATA AGC TTG AGC TCG TA	197300
Gabbr1-ex-6	CAT ACA AGT ACT TGG TGG CT	192600
Gabbr1-ex-7	GGC ATG AGG ATG ATC TTG AT	199900
Gabbr1-ex-8	ACA ATA AGG TTC CAC ATC CG	198200
Gabbr1-ex-9	GGA TGG ATG TGT CCG AAA GA	208100
Gabbr1-ex-10	TTT TCG AAG AGT TTC ACC CG	186500
Gabbr1-ex-11	ATC CAG TGT TGA GGT GAA GA	207800
Gabbr1-ex-12	AAA GTG ATC TCA ATC CCA GC	196300
Gabbr1-ex-13	CTT GAC GCT TCA GGT TTT TA	182300
Gabbr1-ex-14	AAA GTC CCA CGA TGA TTC GA	202000
Gabbr1-ex-15	AAA AAC TTT CCG GGC TTC GG	188900
Gabbr1-ex-16	CAT ACT TCT TCC CAA AGA GC	187100
Gabbr1-ex-17	CAT ACC ACC CGA TGA GAA AC	199100
Gabbr1-ex-18	TTG ACG GGT CAT AGG TTT TG	192100
Gabbr1-ex-19	GTC ATC TCT TCT ACT GTA CA	184100
Gabbr1-ex-20	CAG GGT TCA GCA TGA CAA TC	196300
Gabbr1-ex-21	CAT GTT GGA AAT GCT TCG GG	191600
Gabbr1-ex-22	TTT CTC CAC AAA TTC CTG TG	179400
Gabbr1-ex-23	TGT TCA AGG CCA AAG CCA AG	198000
Gabbr1-ex-24	TGT AGT TAA AGT CCT CCA GG	195900
Gabbr1-ex-25	TTT GGT CTG TAA TGG TCT GG	186600
Gabbr1-ex-26	AAA GAC CAC GTG GCC AGA AA	209200
Gabbr1-ex-27	TAG TAG CCG ATC TTC TTG TA	191100
Gabbr1-ex-28	AAA GAT CAT CCT TGG TGC TG	192800
Gabbr1-ex-29	CGA TCC ACT TGT CTG TTT TG	176800
Gabbr1-ex-30	ACG GAA TGT CTT GAT GAC CA	199400
Gabbr1-ex-31	GCT GGG AGT TCT GGA TAT AA	201400
Gabbr1-ex-32	ACA GCA GTC AGA TTG TTC AG	200500
Gabbr1-ex-33	GCA GAC AAA TGG GAA CTG GC	202000
Gabbr1-ex-34	CTA AAG CCT AAG CCC AAG AG	200100
Gabbr1-ex-35	TAC AGT TTC CAA GGC TCT AG	191000
Gabbr1-ex-36	CAG ATG GCA AGA GTC AGG AT	207700
Gabbr1-ex-37	GGG CAG AAT GGA GAC ATC AA	212000
Gabbr1-ex-38	GAA AAT GCC GAG CCA TGT AT	201500
Gabbr1-ex-39	CAC TTT TGG TCT CAT AAG CA	188200
Gabbr1-ex-40	CTG TGG TCA TTG ATC TTT TC	178200
Gabbr1-ex-41	CGC AAC ATT GTA GAT AGC CA	200600
Gabbr1-ex-42	CAG GAG CGG TAA TGA GAC AC	206300
Gabbr1-ex-43	CTG GCT GGA AAG GAT CAT GG	197500
Gabbr1-ex-44	CAG AGA GGC AAA GGC GAA GG	213200
Gabbr1-ex-45	GCA TCT TAG GCA CAA AGA GC	199100
Gabbr1-ex-46	CAT TCA CCT CGA GTG ATC AA	193400
Gabbr1-ex-47	CTC ATT GTT GTT GGT GGA TG	186500
Gabbr1-ex-48	AAA TGT ACT CGA CTC CCA TC	189900
		195783
Srsf2-Exon	probe sequence	ε(Oligo)extinction coefficient
srsf2-ex-1	CGT ATT TCT CGA AGA CGC GC	186400
srsf2-ex-2	GAA TGT ACA CGT CGC CGA CG	194700
srsf2-ex-3	TGT CGT GGA ACC GGA CGA AG	199300
srsf2-ex-4	GAG ACT TGG AGC GGC TGT AG	197700
srsf2-ex-5	AGG TTG ATC TGG AGC GCG AG	198800
srsf2-ex-6	ATC TTC GGG CAG ATC TGG AC	190300
srsf2-ex-7	GAC GGA GGA GGA CTT GGA CT	201600
srsf2-ex-8	TAG ACT TGG ACT CTC GCT TC	179000
srsf2-ex-9	TAG GAA GAA ACT GCT CCC TC	191100
srsf2-ex-10	GGT AGG TCA GGT TGT CCA CC	190900
srsf2-ex-11	GGG AGG TCA TGC CCT CCA CA	189000
srsf2-ex-12	GGG ACT CCT TGG TGT AGC GG	188400
srsf2-ex-13	CCA TGG CGT CCA TGG CGT CT	178200
srsf2-ex-14	CCT TGA CCT CGA GCG GGA TC	182200
srsf2-ex-15	AGG GCT TCT CGA TCG CGA CC	183200
srsf2-ex-16	CTT GGG TGG GCT CTT GGA CC	177200
		189250
Znrf3-Exon	probe sequence	ε(Oligo)extinction coefficient
Znrf3-ex-1	CTC GAC TCG AAC AGC ACC AC	186100
Znrf3-ex-2	TGG TGT GGG TGG TAT AGT CG	197300
Znrf3-ex-3	AAT TCT GGC TGT TCA AGC TT	184300
Znrf3-ex-4	CAG GAC AGT GAG ACA TGG TT	203600
Znrf3-ex-5	AAG ATA ACT GCA GTA GCT CC	199600
Znrf3-ex-6	TGG CTT CTG GAT TTT CAG AT	184200
Znrf3-ex-7	TCT TCT GAG CCT TGG TTT AG	179600
Znrf3-ex-8	ATA CAC CAC TGG CCT CTT AA	189100
Znrf3-ex-9	CAT CAG CTT GAT AGC ATC TG	190100
Znrf3-ex-10	ATC CTT GCT CGA GCT ACT TT	177400
Znrf3-ex-11	TCA AAG TAC TCG GTG GGT TG	194500
Znrf3-ex-12	ACG ACG AAG AAG GCC AGG AA	215100
Znrf3-ex-13	AAT GAG GCA GAC CAA GGA GA	217200
Znrf3-ex-14	TCA GCT TGA TTT TGA CAA GG	192600
Znrf3-ex-15	GGA ATT CTG ACT ACG ACG TT	193500
Znrf3-ex-16	GCT CTT GGA GTT GAA CTT TC	182400
Znrf3-ex-17	ACA GAT GGC ACA GTC GGA TG	203300
Znrf3-ex-18	TCT CCG TCA ATG TAC TTC TC	176500
Znrf3-ex-19	CCG ATG AGT ACA AGG GAT GA	209600
Znrf3-ex-20	ATG GAT CCA CAC ACT TCC TG	186500
Znrf3-ex-21	TTG TTC TAT GAT GTT GTG CC	181800
Znrf3-ex-22	ACA CAA ACA GCA CCT GGA TT	198100
Znrf3-ex-23	CAC GTG TAA GGT TGC TTG TC	186500
Znrf3-ex-24	TAA TGT ACC GGT AGG GTC AC	198600
Znrf3-ex-25	CAT TGG TCC TAT GCA CAC GG	186500
Znrf3-ex-26	ATA CTT GTC CTA GTA GGG TA	201000
Znrf3-ex-27	CAT GGT TAG CAG TGT GAC AG	199900
Znrf3-ex-28	AGA ATA GAG GTT CTG CTC CC	193800
Znrf3-ex-29	AAG GGA TGG GCT GGT GAG TA	208400
Znrf3-ex-30	CAT ACT GGG AGA AGC AAG CT	201400
Znrf3-ex-31	GTA GTA GTG TTG GTA CAT GG	203500
Znrf3-ex-32	GTG TGA CGC TGG GTA TTG TC	188600
Znrf3-ex-33	GCA ACT GAA GCT AGA TGT GC	197100
Znrf3-ex-34	TAG CCG CTA CAC ACA GAA CG	196000
Znrf3-ex-35	ATA CAC ACC TTG GTT GCT GA	190800
Znrf3-ex-36	AGC TTC GGA AGG TGG AAC AG	204400
Znrf3-ex-37	CGG TAG ATG AAG GGG TCA TA	209800
Znrf3-ex-38	AGC ACT TTG ACT GTG TCC TG	182700
Znrf3-ex-39	CTT CTG AGG TAG AGC TGT TG	189500
Znrf3-ex-40	CGA AGC AGC AAG CAC ATG AT	202600
Znrf3-ex-41	CAC TTG TTT CTA TCC CAG AG	183900
Znrf3-ex-42	AGG ACC CAG GAA TAA ACT GC	204300
Znrf3-ex-43	CTG AGT GAA GAC CAT ACA GG	204800
Znrf3-ex-44	CCA TCT GTC CTA GGA TAA TG	192300
Znrf3-ex-45	GAG TGT GTA CTG TAC ACT CA	197200
Znrf3-ex-46	GAA TAA TGG GGA TGC GCT GG	201700
Znrf3-ex-47	AAG TCA CAG TCT ACA TCC TC	191500
Znrf3-ex-48	GCA TGA GAC TCC TGA GTG TC	190600
		194788
Clcn6-Exon	probe sequence	ε(Oligo)extinction coefficient
Clcn6-1	ATA GTC CAG ACT CTC ATA GT	197800
Clcn6-2	AGG TAA GGG TCA TTG ATG CA	207000
Clcn6-3	TAT TAT CCA TGG TCT CCA AC	187400
Clcn6-4	TAC AGA CGC CAA TGG CGA AC	197800
Clcn6-5	TCG CAC GGA AAA GTC CAC AA	201100
Clcn6-6	TTT GAA CCA CTC CGA ACT TC	181500
Clcn6-7	TCA AGA CAA GAA GGC TTG CC	197500
Clcn6-8	ATT CAG GTA GCA CTT GAT CT	193000
Clcn6-9	CCA AAG ACT TTG CAG AGC AG	198100
Clcn6-10	TGC GGA AGT AGG GGA AGT TA	210800
Clcn6-11	ACA CAA AGT CAC GCT TGT CT	190500
Clcn6-12	TGG TTC CAG AAG GAT GAA CC	199300
Clcn6-13	ACA GAA GAG CAC TTT CCA CG	197800
Clcn6-14	GAA GTT GAG GGT GAA GGT GG	210300
Clcn6-15	ACT TCC AAA CTG AAT CCC AG	191900
Clcn6-16	TCA CCA AAG TTC AGC AAT CC	191900
Clcn6-17	AAA TCC ATA GCT GTC CAG AG	201100
Clcn6-18	CCC CAT CAC GAC GAA GAA AC	196800
Clcn6-19	CAG ACA GTT GAA TGT GGC TC	194300
Clcn6-20	CGC ATA CGG TAC TTT GCA AG	191300
Clcn6-21	TCT GAC GAG CTT AGG TTT CG	186900
Clcn6-22	ACA CCA AGA GGC TCT CTA AG	197600
Clcn6-23	ATT CTC CTA ACA CCA TGG AG	192900
Clcn6-24	ACT CGT GGA AGA CAT CTG TC	193600
Clcn6-25	GAG CTG GAA TGA GCC ATT AC	198900
Clcn6-26	TCA CAT CTT CTG ATG TGA CC	182900
Clcn6-27	CCA TGT CAT TGT AAG TGT CA	195100
Clcn6-28	CTC CTG GGA GTT GAA GAA GA	202700
Clcn6-29	TGA TGG AAG AGC TGC AGG AT	204000
Clcn6-30	CAG ATG TGC CAA AAG TCC AG	200300
Clcn6-31	AGC AGG GAA GGC ACG AAG AG	215000
Clcn6-32	CAT TGG CAA CTA AAC GTC CA	194700
Clcn6-33	CAG TCC AAT GTA GCT TTT CA	189800
Clcn6-34	GCA AAG GTC CCA GAA TAG AG	209600
Clcn6-35	CTG ATG GTC ATC CTT ACA AC	186900
Clcn6-36	CCA TAG GTG ATC TCA TTT GT	189100
Clcn6-37	CAG AGT GAC CAT GAT CGG AA	206100
Clcn6-38	TGT TGA ACA AGT CTC CAG TC	190700
Clcn6-39	GCC CAA TAT GGA CGT CAT AA	201700
Clcn6-40	TCA TGA ACT CCT TCT CGT TG	177900
Clcn6-41	GAA GGG TAC GAC TTC ATG GA	204800
Clcn6-42	TGA AAG GTC AGC GGA CGG AA	208500
Clcn6-43	AAG CAG GGT GAC AAG CTG AG	207900
Clcn6-44	GCC ATC TCA GCG TAA GAA AG	201000
Clcn6-45	ATA TAT GGG GTG ACA TCC AC	201400
Clcn6-46	GTT GGG GGA GAC GGT AAA TG	207200
Clcn6-47	CAT GGT TCT GAA CAG GTT GA	196800
Clcn6-48	ATT CAT TTG TCA GGT TGT GC	187400
		197262
Ybx2-Intron1	probe sequence	ε(Oligo)extinction coefficient
Ybx2-in1-1	TCC GGG ACT AGT TAT GAT TA	198700
Ybx2-in1-2	CCA GCG GAA TCC ACT AAT AG	198400
Ybx2-in1-3	TGA AGG TGC GGC AAG ATT TC	196300
Ybx2-in1-4	AAA GCC TTA GCT GAA CCT GC	189600
Ybx2-in1-5	GGA GGT TTT TAT TTT CCT AC	185300
Ybx2-in1-6	AAA CAG GGG TGT GGC CAG AC	202800
Ybx2-in1-7	GTC AAC TAC ACC AAG TAT CC	194900
Ybx2-in1-8	GGT TTA CCT AAC AAG AAC CG	199000
Ybx2-in1-9	GCC CTC CTA AAT TTA AGA GA	197900
Ybx2-in1-10	AGG GTC AAA ACT CAA CAG CC	200400
Ybx2-in1-11	TAG AAC CGG GTA CTC ACC TG	191700
Ybx2-in1-12	TAC GGA GTT CAG GTC TTT CA	192100
Ybx2-in1-13	CAA ACC CAC GTT CCT CAC AT	183000
Ybx2-in1-14	GGA AAA ACA CAC AGG GGG GT	210700
Ybx2-in1-15	TAC TCT TAA CCC TCT TTC TA	176600
Ybx2-in1-16	GAC TTC GCT GGA AGT GTC AA	195200
Ybx2-in1-17	CCT AAT AAG CTG CGA GTC AA	198800
Ybx2-in1-18	AAG CTA AAA CCT AAC CTG CC	193500
Ybx2-in1-19	TGG GCT GAG TTT TGA GAG AA	202100
Ybx2-in1-20	AGA TGG GGG AAG AGA CGG GA	219400
Ybx2-in1-21	CAG AGA TGC AGT GGG GAT AG	209500
		196948
Ybx2-Intron4	probe sequence	ε(Oligo)extinction coefficient
Ybx2-in4-1	AGA AAC CCA CAT GTT ACT GG	199300
Ybx2-in4-2	TGG AAG TGC TTG GTG AAC TA	198400
Ybx2-in4-3	GGT CCC GTG TAG AAA ACA GA	206800
Ybx2-in4-4	ATT CCA GAG GAC TGA CTG AG	200900
Ybx2-in4-5	GGA TGA GAT AGA GAG AGC CA	218700
Ybx2-in4-6	CCC AGA GTG TAA AGA CAG GA	210800
Ybx2-in4-7	GTC CTT AGA AAT AAC TGC CA	197700
Ybx2-in4-8	TTT GTA CCC ATC TGA GAA GA	197700
Ybx2-in4-9	TCA AAA CCA CTC CTC CTT TG	177900
Ybx2-in4-10	CAA GTC CTC TAC CCT ATC AC	181000
Ybx2-in4-11	ACA AAC CTG CCA GAT CAC TG	193100
Ybx2-in4-12	AGA GGG GGA GCA ATC AGA AC	213700
Ybx2-in4-13	GTG ACA GGG ATG GGT TCT TT	193100
Ybx2-in4-14	ACA TGT CCT AGA GCA GCT CT	190000
Ybx2-in4-15	AGG CAG AGC TGG TCC CAG GA	199800
Ybx2-in4-16	AAC TCC ACC CCA CAG CAG CA	189300
		198012
Ybx2-Exon	probe sequence	ε(Oligo)extinction coefficient
Ybx2-ex-1	GCT GTC TGG TGA ACA AAG AC	197100
Ybx2-ex-2	AGT GAC ATT AGC AGC TTC TG	194000
Ybx2-ex-3	ACG TCG ATT AGG GGC ATA GC	199900
Ybx2-ex-4	CGA GGA ATG AAC CTC CGG AA	202400
Ybx2-ex-5	ACC GCC TTC GAT AGA AGA AG	202300
Ybx2-ex-6	GAA GTA GGG ACG GTT TCG TG	201600
Ybx2-ex-7	CAC TGT TGA TAG GCG CGG AG	194300
Ybx2-ex-8	ACT CCG CAG AAA CTT CCT GG	186100
Ybx2-ex-9	ATC ACC CTC CAA TGG TGC TG	183400
Ybx2-ex-10	TTC TCT CCT TCC ACG ACA TC	171100
Ybx2-ex-11	CAC CCG TTC ATC TCC CTG CT	166500
Ybx2-ex-12	CCA CCT TCT GTG GTA GGC TG	178900
Ybx2-ex-13	CTA CCC CAT CAG AGC CCT CT	176300
Ybx2-ex-14	CTC TGC CAC CAT AGG TGG TG	184200
Ybx2-ex-15	TTG ACT GTG CCC AGG ACT TG	183200
Ybx2-ex-16	GGC TGG GCT TGG TCT CTC CA	176000
Ybx2-ex-17	GTA ACC ATT CCG GAC GTT GA	195100
Ybx2-ex-18	CCT TGG TGT CAT TCC TGT TG	174700
Ybx2-ex-19	TCA GGC CGG GAG CCA TCA GT	191000
Ybx2-ex-20	CCT TCG GTA CCT GGG CCG GA	180900
		186950
Ybx2-Intron2	probe sequence	ε(Oligo)extinction coefficient
Ybx2-in2-1	GTT CGG AAA AAG ACA CCC GT	200200
Ybx2-in2-2	AAA TAA GGT GTC CAA TCC CA	204100
Ybx2-in2-3	CAT CAC AAC CAT GTG CCT TG	184300
Ybx2-in2-4	AGA CTT TCA ACT AGC CTC AG	191700
Ybx2-in2-5	GCC AGT AAG CAT ACA TTT GT	197000
Ybx2-in2-6	CTT GAA GAT GTG GGT GCA GC	193700
Ybx2-in2-7	CCA AGT TCC TGG ATC ATT AA	194100
Ybx2-in2-8	AGA AGA GCT GGG AAG GTC AG	212800
Ybx2-in2-9	AAT GCA GCA ACT CCA GAA GG	203600
Ybx2-in2-10	AAA GGC ACA CAG CAT GCT AA	206000
Ybx2-in2-11	AGG AGC CCC AAA CAT TCT AC	194800
Ybx2-in2-12	CCA GGA AAT CAG TGA GGA CT	203600
Ybx2-in2-13	GGG ATA GAA GTT GTG AGG GT	210100
Ybx2-in2-14	TGG TGC GTG GTT CAA ATG AG	196400
Ybx2-in2-15	CTT CAG TTC TAT CCT TTA GG	181300
Ybx2-in2-16	CTG AAG CAA AGC CTT CTC AG	189700
Ybx2-in2-17	CTT TCC CAG AGC TTG GAA GG	187800
Ybx2-in2-18	TGG CTC TAC TAG GTC AGA AT	193500
Ybx2-in2-19	AAA GAG GGA ACT GAG GCT CC	204100
Ybx2-in2-20	CTT GGA TCT GCA CAA AGG TC	189600
Ybx2-in2-21	CCA TCC CTA GAA CAA ATG TT	193400
Ybx2-in2-22	AGG AGG ACT CCT TGC AGG AA	202000
Ybx2-in2-23	TAC TCT CAG TCT CTG TCA CC	175400
Ybx2-in2-24	AGC TGA ACA AGG GCG AAA GG	210400
Ybx2-in2-25	CAC GAC ATT AGG AGC ATT CT	194800
Ybx2-in2-26	GTT GGA AAA TTC CAC AGG CT	195400
Ybx2-in2-27	GGC GTG GAC TTC CTA AGA AA	199100
Ybx2-in2-28	CAC CAG GGC TCT AAA AGC TG	191500
Ybx2-in2-29	ATG GGC AAG GCA CTC AGT TC	193400
Ybx2-in2-30	ACA GGA TGG GTT GTT AAG GG	206300
		196670
Ybx2-Intron3	probe sequence	ε(Oligo)extinction coefficient
Ybx2-in3-1	AAA GGC AGC CTA GCT CTT AC	191800
Ybx2-in3-2	AAA GGC TTC CAG AGA GGG AG	209300
Ybx2-in3-3	TGT GTG CAG CTA GGG TTA TG	193500
Ybx2-in3-4	CAG CTA TAG GCA GGC TAC TG	193300
Ybx2-in3-5	AGT TGG GTT AAT GGT GGT TC	196200
Ybx2-in3-6	CTG ACA GCT GTT TAG CAA CT	187100
Ybx2-in3-7	CTT CCT GTG GTG TTA ACA GG	186400
Ybx2-in3-8	AAA CGT GCT GTG CTT CTT AC	183500
Ybx2-in3-9	ATC TCA AGT TGC AAA GTG GG	200400
Ybx2-in3-10	CAA GAG CTA GAG GTC TGA GG	205200
Ybx2-in3-11	CAG CTC CAC AAG ACA GAG AT	201700
Ybx2-in3-12	GGG CAG AGC ATG AAA ATG GT	208100
Ybx2-in3-13	AAA GGT GAG GGC AGC AAA GC	210500
Ybx2-in3-14	GGT TGG GGG GAA AAG TCA TG	205800
Ybx2-in3-15	GAT TCA GGT GAT GCT GCT GC	186400
		197280
Esyt2-Exon	probe sequence	ε(Oligo)extinction coefficient
Esyt2-1	TCT GGA AAA TGA ACC CAG GC	197300
Esyt2-2	CAC ATG TGC TTT ACA GTC TT	183200
Esyt2-3	GGT TTC TCG AAA GAG CTT CT	187600
Esyt2-4	CAC ATC CAC TTT TGT GAA GC	185100
Esyt2-5	ACC TTA ACA CCA TTG ACT CT	185800
Esyt2-6	TTT TCA CAC CAG CTC TAC AA	185800
Esyt2-7	ATT GTC CCA TGG ATC TGA AT	193000
Esyt2-8	CTC CAA CTA AAG GCA TGT CT	189100
Esyt2-9	CCT GTC CAG TTA ATC TCT AA	187300
Esyt2-10	GAT GTC CAG AAG GTT AGT CA	205600
Esyt2-11	GAA CGG TGA TTC GAT TGG GA	203200
Esyt2-12	CGC AGC TGA GCT ATT TGA AC	189000
Esyt2-13	AAG TGA ATC CTT AGG ACA CC	200200
Esyt2-14	GAC AAG GCC TTT AAG GTA GG	203100
Esyt2-15	AAT TCC ATA GGG GTC TGA TT	196700
Esyt2-16	CTC TTT GAT GAC TTT GCT CT	171400
Esyt2-17	ACT TCA TTC CAT TTT GGA CT	181800
Esyt2-18	GGT GTT CAT ACA CTA AAG CC	195200
Esyt2-19	TCA ATC TCC AAT TCT TGT CC	177600
Esyt2-20	AAT CAT CCT TGT CTG GAT CT	185000
Esyt2-21	GCT CCT TCT CAA CTT CAA TA	181700
Esyt2-22	TCC AGA GTG AAC CAT TCA TC	193100
Esyt2-23	TCA AAT GCA GCT TTC CTT TG	180300
Esyt2-24	ATC AGT GTG AGC CAC TCT AA	197300
Esyt2-25	TTG TCA AGG TTT GCA GCA TC	187900
Esyt2-26	CTT GTC AGC TCT GAT GTC TG	178000
Esyt2-27	ACG GAA GGT TCC TTG CAG AA	200000
Esyt2-28	TGG GTT GCT GTT TAT TTT CT	176700
Esyt2-29	CCG ACT GAC ATC TGG ACA AG	194100
Esyt2-30	GAA TCT TAC TCT CTT GAG CC	181900
Esyt2-31	ACA GGC TCA CTA GTT TTG TA	194100
Esyt2-32	GCC TGG GGT TAT GAA TGA AG	200900
Esyt2-33	TAA GCA GTT GAC TGA GTG GG	201300
Esyt2-34	CGC TGG TTT ATA GTC ATG TT	187500
Esyt2-35	CGA CGC AGA CAT CTG AGA TT	196400
Esyt2-36	CAT GAC TGG TGT TGA CGG AG	195800
Esyt2-37	GAT ATG TCT GAG GCA ATG CT	196000
Esyt2-38	TTG TCC CAT TTT CAA GTT GA	186500
Esyt2-39	CGG ATA GTC AGC TGG ATC TG	193900
Esyt2-40	CGA TGA GCT TAT TCC TTT GG	184000
Esyt2-41	TTT CTG CAG GAG TGC ACA AC	189500
Esyt2-42	CAT CTT CCG AGA AGG CAA TG	195600
Esyt2-43	ACA GGG TTC AAT GTC TTC TT	187700
Esyt2-44	GGC AGC GAA ACA CTG AAG TC	200300
Esyt2-45	ACA TCC AAT GTT CTC CTT TG	181500
Esyt2-46	TTA TCT TTG GAC AGG AAG CC	192400
Esyt2-47	AAC CAG CAC TTT GCC AAG AA	198200
Esyt2-48	CTT GGC GAG TTC TTC AGA TG	186000
		190450
DMC1-Exon	probe sequence	ε(Oligo)extinction coefficient
DMC1-FISH-E1	ACA ACT TGA TCC TCC TTC AT	181900
DMC1-FISH-E2	ATC TTG GAA TCC CGA TTC TT	184800
DMC1-FISH-E3	GTC TTG AAA CAG AGA TTC CT	195600
DMC1-FISH-E4	TTA ATC CCA TGC TTC TGC AA	183800
DMC1-FISH-E5	CAG TTT CTT AAT ATC AGC CA	193100
DMC1-FISH-E6	TGG TAC AGA TTC CTA CAG AC	196600
DMC1-FISH-E7	CTG AGA GGC CTT TGA CAT TG	188900
DMC1-FISH-E8	AAT AAG CTT GTT GGC TGC CT	185700
DMC1-FISH-E9	ATG CAG TTA GGA ATC CTG GT	198100
DMC1-FISH-E10	TTC CTC CTT TCA CTG TAC TG	170300
DMC1-FISH-E11	AGT AGT GAT ATG GAA TAC CA	214800
DMC1-FISH-E12	ATT TAT CAA ATT CCT GGC TC	186200
DMC1-FISH-E13	CAT ACT TTC AAT GCC ACC TC	179500
DMC1-FISH-E14	CTC CAA AAG CTT CTG TAA TT	187600
DMC1-FISH-E15	TGA GTT TTT CCA GTA CGA AA	198600
DMC1-FISH-E16	CAC ACA GAG GGT ATG AGA CA	211000
DMC1-FISH-E17	CTG TTC CTG GAA GTT GAG CT	184400
DMC1-FISH-E18	GAT AAT CTT TCC ACC TGA GT	189600
DMC1-FISH-E19	GAA GGC GAT CTG GAC GGA AA	208300
DMC1-FISH-E20	TTG AAG CGG TCA GCA ATG TC	194200
DMC1-FISH-E21	CAG TAC TGC TTC ATG GTC TA	187500
DMC1-FISH-E22	AGT ATA GGC ACG TGC ATA GA	210400
DMC1-FISH-E23	TCA AGT AGC TCC ATC TGA TG	191200
DMC1-FISH-E24	ATG AAA CTT GGC TGC GAC AT	194500
DMC1-FISH-E25	GTT TGA AAA TGC CAG CTT CC	187300
		192156
Actb-Exon	probe sequence	ε(Oligo)extinction coefficient
Actin-Exon-1	AGC GCA GCG ATA TCG TCA TC	193900
Actin-Exon-2	TAG GAG TCC TTC TGA CCC AT	186200
Actin-Exon-3	CTC TCT TGC TCT GGG CCT CG	163100
Actin-Exon-4	GCC ATG TTC AAT GGG GTA CT	191000
Actin-Exon-5	CTC CAT GTC GTC CCA GTT GG	178800
Actin-Exon-6	GCA GCT CAT TGT AGA AGG TG	199000
Actin-Exon-7	TTC ACG GTT GGC CTT AGG GT	183800
Actin-Exon-8	CTC AAA CAT GAT CTG GGT CA	194500
Actin-Exon-9	TAC GTA CAT GGC TGG GGT GT	192200
Actin-Exon-10	CTG TGG TAC GAC CAG AGG CA	197400
Actin-Exon-11	GTC TCC GGA GTC CAT CAC AA	191300
Actin-Exon-12	GTA GAT GGG CAC AGT GTG GG	202800
Actin-Exon-13	TCA TGA GGT AGT CTG TCA GG	197500
Actin-Exon-14	TTC CCT CTC AGC TGT GGT GG	174700
Actin-Exon-15	AGC ACA GCT TCT CTT TGA TG	184600
Actin-Exon-16	GCC ATC TCC TGC TCG AAG TC	177400
Actin-Exon-17	TTC TCC AGG GAG GAA GAG GA	206200
Actin-Exon-18	CCG CTC GTT GCC AAT AGT GA	187400
Actin-Exon-19	TGG AAA AGA GCC TCA GGG CA	203800
Actin-Exon-20	ATG GAT GCC ACA GGA TTC CA	198700
Actin-Exon-21	GTC ACA CTT CAT GAT GGA AT	196200
Actin-Exon-22	GCA TAG AGG TCT TTA CGG AT	198800
Actin-Exon-23	TAC CAC CAG ACA GCA CTG TG	192100
Actin-Exon-24	GTC AGC AAT GCC TGG GTA CA	194900
Actin-Exon-25	CCA GAG CAG TAA TCT CCT TC	186800
		190924
Gabbr1-Intron5	probe sequence	ε(Oligo)extinction coefficient
Gabbr1-in5-1	GGA AGG GTT TCT GAT CTC AC	190900
Gabbr1-in5-2	GTG AAG AGT GAG GGG ATG GG	212900
Gabbr1-in5-3	AGT AAC AGG ACA CCC ACA AC	204200
Gabbr1-in5-4	AAC TAG AAT GGG TGG TGG GA	210500
Gabbr1-in5-5	AAA CAG GTA GGA GAG GAG GG	221800
Gabbr1-in5-6	CGG AAA ACC GCG ATT TGG CG	192500
Gabbr1-in5-7	AGA AAG CTG AGT CCG AGA GG	210300
Gabbr1-in5-8	CAC GAA GGA GAG ATC TGG GA	210200
Gabbr1-in5-9	CAG GTA AAA CCT GGG TAG GG	204400
Gabbr1-in5-10	GTG AAC AGG GTC GAC GGA AC	203700
Gabbr1-in5-11	AGG TGA TGG GAG AAA GGG TC	212300
Gabbr1-in5-12	GAG AAG TGC AGC TTA GGA GA	211800
Gabbr1-in5-13	TTG CAG AAG GGG AGA ACT GG	205200
Gabbr1-in5-14	GAG CGA GAG CGA TGG GAA AG	213700
Gabbr1-in5-15	ATG GAG CGA GGA ACT AAG GG	212400
Gabbr1-in5-16	TGG GTA GGT TAG GAG AGG AA	215500
Gabbr1-in5-17	CAG AGC AAA GAG GGG AAG CG	213200
Gabbr1-in5-18	GGA TTT GGA AGG AGA GAG GA	218400
Gabbr1-in5-19	TCT GCC TAA GGA GAC TAG AG	200000
Gabbr1-in5-20	GGA CAC TTC TTC TGG GGA AG	191200
Gabbr1-in5-21	ATC ACC AGC AGA AGA GGC AG	208200
		207776
Polr2a-Exon	probe sequence	ε(Oligo)extinction coefficient
Polr2a-1	TTC AAT TCA TCC GGA CTC AG	187900
Polr2a-2	CGT TGT TTC TGG GTA TTT GA	186200
Polr2a-3	AGC GCA AAA CCT TCA TTG TC	189600
Polr2a-4	CAT ACA ACT CTA GGC CAG AG	198200
Polr2a-5	GAG TCC TCA TTA ACA TGC TT	188600
Polr2a-6	TCA GCA AGA TCT TTT TCT CC	179900
Polr2a-7	CTC ATC TGA GAT GCG TTT GA	189600
Polr2a-8	CAC TGT GAC AAT CAT CCA CT	187400
Polr2a-9	AGT CAA TTC GAT CGC CAT TA	196900
Polr2a-10	CTG GGC TTA GGA TGG AAA CG	197700
Polr2a-11	AAA GTA GAC CAG GGG AGG AT	216700
Polr2a-12	CCA GGA AGA CAT CTC TCT TA	192800
Polr2a-13	TTC TTA CAA AGG ATG CCC AT	191300
Polr2a-14	CTG GGA GAT GTT GAT CTT GG	192200
Polr2a-15	CAG GAC CAT AAT CAT CCT TG	192500
Polr2a-16	AAC AGC CGT GTC AAT GAG AC	201600
Polr2a-17	ATC AGC CTT CGC TGA ATA TA	195100
Polr2a-18	CAT CAT ATT TCA CCA TCA CC	185400
Polr2a-19	TTC CAG CTC ATT CTG TAT AT	183900
Polr2a-20	TTC ACG CAT CCG TTC AAA TT	184500
Polr2a-21	TCA CCA GTT GGG AAG ATG AC	199700
Polr2a-22	GCA GAA GGT TAC AAG GGA GG	212500
Polr2a-23	TTT TCT GAG CAT TCC AGA TC	184000
Polr2a-24	TTG CTC AAT TCT TTG ACT CC	173600
Polr2a-25	GGA TCT TAG GTG GAT GTT GA	201400
Polr2a-26	ACC AGC ATA GTG GAA AGT GT	206900
Polr2a-27	CAA AGA ATG TCC TTG GCT CT	186900
Polr2a-28	TAG TAG ATG GCT GTA TTG GC	196700
Polr2a-29	TCA AAG TCG GGC ATC TCA TA	196400
Polr2a-30	CAA TCT GTT CCA TGG TAA GC	190000
Polr2a-31	ACT GTT CAT GAT GCG GAT TC	189800
Polr2a-32	CAT ATC TGT CAG CAT GTT GG	190300
Polr2a-33	TAC CGT GAA GAT CTC CAC AA	197600
Polr2a-34	GTC ATA GTG TCA CAC AGG AG	203800
Polr2a-35	GTT TCC TCA AAG GAG CAT TT	190500
Polr2a-36	CCC AGC ATA ATA TTC TCA GA	196700
Polr2a-37	TAT TTG CAC TTC TCA GCA TC	179900
Polr2a-38	AAG ATG GAG AGG TTG GGG AG	215700
Polr2a-39	GGA GAA TAG CTT GGA GAG GT	209900
Polr2a-40	TAG CTG GGA GAA GTT GGA GA	210000
Polr2a-41	TAG CTT GGT GAA GTT GGT GA	199000
Polr2a-42	TAG TTG GGA CTT GTA GGT GA	201200
Polr2a-43	AAT AGC TTG GAG AGG TTG GG	205300
Polr2a-44	GTG AGG TGG GGG AAT AAC TG	206600
Polr2a-45	GTT GGA GAC TGT GGT GTA TA	202400
Polr2a-46	AAG GAC TAG TTG GGG TGT AC	203700
Polr2a-47	ATT TAG GGC TTG TAG GTG AG	200800
Polr2a-48	CGG GGA GGT TGG AGA ATA TT	205300
		195721
Dph1-Exon	probe sequence	ε(Oligo)extinction coefficient
Dph1-FISH-E1	CAG TCT CGG ACA CAA CCA GC	190200
Dph1-FISH-E2	CTC AGG GGG GAT CTG ATT GG	192900
Dph1-FISH-E3	TGT AAC TGG GGG TTG TTC AG	192900
Dph1-FISH-E4	AAG GCA GAA CTT GGA CAG CA	207200
Dph1-FISH-E5	GGG ATC TCA AAG TTG TAG TT	199300
Dph1-FISH-E6	CTG GAT TCT CCA GAT GGT TT	184400
Dph1-FISH-E7	AGG CCT TCT GGC ATT TGT AA	189000
Dph1-FISH-E8	AAT AGT GCA GGC AAA GAG GA	218100
Dph1-FISH-E9	TGA ACC TTT CCA AGA TAT CC	189700
Dph1-FISH-E10	CAG TGA AGT CAT CCA CAC AG	199400
Dph1-FISH-E11	CAG GAA GTC AAC TCC CAA GG	199000
Dph1-FISH-E12	CTA GAC AGC TGT GAC CAT AG	197600
Dph1-FISH-E13	TCG GAA GTC TTG AAC GGA GG	200000
Dph1-FISH-E14	GGA TAT CCA CGA AGA CAT AC	206200
Dph1-FISH-E15	AGA AGG TGG GCA GTG TCT AT	203600
Dph1-FISH-E16	TAA AGG TGA GGC GGA CCG AG	206700
Dph1-FISH-E17	AAC TGA ATG GTG CTG ACC AG	197900
Dph1-FISH-E18	GAT GTG ATA ATC AGC TTT CA	199200
Dph1-FISH-E19	CTT GGA TAG CCG AGG GGA TG	198000
Dph1-FISH-E20	GAT ACA CAA CAG CTT CCA CT	191800
Dph1-FISH-E21	CAG ATG AAA GCG GCC ATC TC	193600
Dph1-FISH-E22	GGT TGG CAA TCA TGA CAG AC	199300
Dph1-FISH-E23	CAT ACC GGT AAG CAG GTA TA	206700
Dph1-FISH-E24	GAT AGG ACT TTG CCA TAT GG	197800
Dph1-FISH-E25	CAA GGT TCC CAG AAT AAG GC	200400
		198436
Malat1-EVEN	probe sequence	ε(Oligo)extinction coefficient
m-Malat1-2	AAC TTC ACA AAA CCT CCC TT	184600
m-Malat1-4	CAA CTC ATG CCT TCA AAC GT	185200
m-Malat1-6	TGG CAT CCA AAG TTG TCT TA	192000
m-Malat1-8	TAG CTT TGA TTG CTA GCT TC	180600
m-Malat1-10	CTC AAG GAA TGT TAC CGC AC	192200
m-Malat1-12	CAT CTA CCA TTC TTC TTT CT	171100
m-Malat1-14	GAG TGG ATT TCC TTT TTT CT	179300
m-Malat1-16	TCA GCG GCA ACT GGG AAA AC	197900
m-Malat1-18	TTA AAG CCA CTT CCT TTG TT	179500
m-Malat1-20	GGA ACA ATC TCT GGC TCA TG	190200
m-Malat1-22	TTT TAC TCC AGG CTT AAT GC	182000
m-Malat1-24	CTG CTC CGA GAT GGA ATG AA	198600
m-Malat1-26	CTA TTA GCT ATC CCA TCA TG	187800
m-Malat1-28	GCA CAA GTA CAT TGG AGC AC	200300
m-Malat1-30	AGA TGT TTA GCC ATG GTC AA	202100
m-Malat1-32	TGA CCT GAA GTC AAG ACA CC	196800
m-Malat1-34	TTA ATC ATA CTC CAG TCG CG	189300
m-Malat1-36	AGA CTA AAG GCT TCA GTG CT	196300
m-Malat1-38	AAA TGG CAT GTC TGC TTC AC	188000
m-Malat1-40	GGT CTC GAT ACA ATA CTG CT	190800
m-Malat1-42	TGG CGA TGT GGC AGA GAA AT	204000
m-Malat1-44	GGG GAA AAT TGA TGG CCT TT	196100
m-Malat1-46	CCA GCA CTG GTA TCA AAC AT	194800
m-Malat1-48	TCC ACT AAG ATG CTA GCT TG	189000
		190354
Malat1-odd	probe sequence	extinction coefficient
m-Malat1-1	AAG CCT TCA TGT TAT CTC TT	182600
m-Malat1-3	TTT AAT CTA CAA GGC CGA CC	190900
m-Malat1-5	AAC AGC TTT TTC TTC ACC TT	176500
m-Malat1-7	TGT GGC TGT CTA AAG ACT CT	186800
m-Malat1-9	TTC CTA GTT CAC TGA ATG CA	188700
m-Malat1-11	GTT ACA GAA AAC CAC CAC CA	202100
m-Malat1-13	GCC TTT AGG ATT CTA GAC AG	194900
m-Malat1-15	TAA ACT ACC AGC AAT TCC GC	190900
m-Malat1-17	ATT CAT CCA ACA GCT TCA GA	195900
m-Malat1-19	GCC TTT ACT TAT CAC TCA TT	179000
m-Malat1-21	TTT GCA TAT GCA GCT TTT CA	183900
m-Malat1-23	GAG AAA CCT GTC TGA GGC AA	203000
m-Malat1-25	ACA TGC AAT ACT GCA GAT CC	195900
m-Malat1-27	AGC ACA TAA TGA TCC CTT TC	190800
m-Malat1-29	TCT TTC CTG CCT TAA AGT TA	181800
m-Malat1-31	TGG GGG AAA AGT GTC TTA CC	197100
m-Malat1-33	GCA GAT TGG AAC AGT ACT GC	198700
m-Malat1-35	CGG GTT ACT TAA AGC TGC AG	193200
m-Malat1-37	GAT AGA TGT CTG CTG TTG TC	189500
m-Malat1-39	AAA GAA CTA GGG CTT CCC AA	202500
m-Malat1-41	AAG GTG TTA CGG TAG GGT AG	209500
m-Malat1-43	TAT GCA ACG TGA CCT CAA GG	195700
m-Malat1-45	TAT ACC CAT ACT GGT TTG TT	187200
m-Malat1-47	TCT GTT ATG TCC ACC TGA AA	189100
		191925
mouse-Neat1	probe sequence	extinction coefficient
Neat1-1	ctgtcccaaaatctagtctcc	191200
Neat1-2	gttaaaggcgctttggaagct	202900
Neat1-3	aagcacggaacctaggcaaag	217800
Neat1-4	agtagggaagagtgagaccac	225000
Neat1-5	cccaggggcaaggttttaag	196200
Neat1-6	gcgcagacgttaaagtgtcc	194700
Neat1-7	tcatttacaacccaacagct	189000
Neat1-8	tctaaggaagattcctccac	191700
Neat1-9	cttcccactgttaaaccaca	184600
Neat1-10	tctaccaagtcggcagaatt	194500
Neat1-11	gaacaaaaggggccagaacc	208100
Neat1-12	tcccaagcttgatccataac	187800
Neat1-13	cacaacgggaggcgtttaca	198500
Neat1-14	tgttgtataaggcatgactcc	202500
Neat1-15	ataagcaaaccctgttgtct	192000
Neat1-16	gcaaagcactcatgaggtttc	203100
Neat1-17	aacccacaatggatgtattc	198400
Neat1-18	gtttttaagcaccattcaagc	199900
Neat1-19	caccacttttaagcacactc	182800
Neat1-20	tggttagtgggtttgtacac	192600
Neat1-21	ggtcgagaatgtaacagcca	206400
Neat1-22	aggcctaactatatgaaggca	216300
		198909
Neil3-Intron6	probe sequence	extinction coefficient
Neil3-in6-1	GAG AGT CTC AGT CAG ACA TC	200400
Neil3-in6-2	TAG TCA GTC CTT CAG ATA CA	197800
Neil3-in6-3	ATT TCA GTT TCA GGG TTC TG	187900
Neil3-in6-4	CAT CTG CAC TGG TTC TTA TG	180500
Neil3-in6-5	CCT GAC TCT TGA GCT GAT AA	189000
Neil3-in6-6	GCT AAT GAT TCT GCT TCT CG	180000
Neil3-in6-7	TTT CCC AAA GTC GGT ATT TC	185200
Neil3-in6-8	AAA AAT CTT CCC CCT TCT AT	183800
Neil3-in6-9	AAC TAC CTT GCT GGT AAC TC	185500
Neil3-in6-10	CTG AGC ATT TTA GGC TTC AC	183900
Neil3-in6-11	AAA AGC AAT CGG TCA CCT CT	194400
Neil3-in6-12	TTC TCC ACA GAT ACA ATG GC	191100
Neil3-in6-13	GTG GAT GCG GAC ACA TTT AT	197200
Neil3-in6-14	TGT TAC GTG CAC AGA GTC AA	199700
Neil3-in6-15	AAG ATC TTC AGT GTG CTT GG	192400
Neil3-in6-16	CTT TAA TCT CCA ATG CTG CA	183100
Neil3-in6-17	AAC CTC ATT TCT AAA ACC CC	186500
Neil3-in6-18	CCA GCT CAC AGT TAA ATC GA	196900
Neil3-in6-19	AAA CAG AAT CGG GGT GGG TT	205700
Neil3-in6-20	CGG TTC TGC AAC ACC TTA AA	189400
Neil3-in6-21	AAG CCT TGC TAG GTA AGT AT	200200
Neil3-in6-22	GAC AGT TAA GGG AGT TGG GA	211600
Neil3-in6-23	ATA AAA GAG GCA GCG TCA CC	205500
Neil3-in6-24	CCC AGC TGG GCA AAT AAT AA	201700
Neil3-in6-25	CTC TGC TTA ACC ATG TAT GT	183400
Neil3-in6-26	AGC TCC CTT ATC ATT GAA TC	186500
Neil3-in6-27	CAC TAA GTT CTC ATT AGC CT	185200
Neil3-in6-28	CAC AGT AAG AAC TGC CTT CT	189300
Neil3-in6-29	TCA AAT ATC CGT GCA CGT GA	196400
Neil3-in6-30	CCA AAT ACC TTC AAG TCC AG	192900
Neil3-in6-31	ATA TGA TCC CTT TAG TCT GT	189100
Neil3-in6-32	CAA CAG CAG TGC TGG TAA TC	195100
Neil3-in6-33	GTG AAA AAG GCC GGA TGT GG	206000
Neil3-in6-34	GAG AAT TTC CTG CTT CTG AC	184000
Neil3-in6-35	AAG GGT GGT ATA AGC CAG AT	210800
Neil3-in6-36	GAG ACC TGA AAG TGT TGC TT	194600
Neil3-in6-37	CCA AAG ACG CTA GGT CAC AA	201800
Neil3-in6-38	CGG TCT CTG CAA GAA TTC AC	187300
Neil3-in6-39	TGT TCA TTT GAC CTA ACT CC	180300
Neil3-in6-40	CTC TGA TCT TTA CCT TGA CT	174600
Neil3-in6-41	GCA CCT TGT ACA CAA ACA CA	196200
Neil3-in6-42	ACT CTC AAA GAT AGC CTT GC	190200
Neil3-in6-43	GCC TAC ACA GCT TAT TTA TC	186000
Neil3-in6-44	AAG TTA AAC AGC GCC ATG GT	201600
Neil3-in6-45	ATA ATG CTT TAG CGT CTC GG	190300
Neil3-in6-46	GAC TGA CAA GAG AGT GTG CT	202100
Neil3-in6-47	ATT ATT CTC CAC CTA GAA GC	191400
Neil3-in6-48	ATA TCA CAC ATC CTA CTC GG	191800
		192423
Zfp598-Intron	probe sequence	extinction coefficient
Zfp598-in5-1	CTA GGT CTG AAG TCT GGG AA	199000
Zfp598-in5-2	CAG CTG GGT AGA AGG AAT CT	201800
Zfp598-in5-3	TGA GGA GAT AGC CAG GTG GG	206900
Zfp598-in5-4	CAG GTG CTT GGA GCA AGG AA	202700
Zfp598-in5-5	AAG GAG CTC ACA GCT ATC AC	197900
Zfp598-in5-6	AGA GCC CAA ATG CAA AGC AC	203500
Zfp598-in5-7	ATA GTC TGT AGT CTC CTG AG	193900
Zfp598-in5-8	TTG GGG ATG GGA TAT ATG GG	204800
Zfp598-in5-9	TAC AAG GAC AGG GGC CTA AG	205300
Zfp598-in5-10	CCT CTA AAA ATC AGT TCC CA	191000
Zfp598-in5-11	AGA CGC CGC AGA ATC CAA AC	199900
Zfp598-in5-12	CTT ACG ATC CAC AAG GGT AG	198200
Zfp598-in5-13	TTT CCC GGG TCA ACC AAT AG	189900
Zfp598-in5-14	TGT GGT CAG TAC ATA GCC TG	193200
Zfp598-in5-15	CCT AAG CCT GGC TGA GCC TA	183500
Zfp598-in5-16	CTC ACA GAA GGA AGG CCC CA	198000
Zfp598-in5-17	AGA GGC TTC TCC ACC CCC AA	184600
Zfp598-in5-18	GAA CTG CTG TCC AGA CCA CA	192000
		197006
Gapdh-Exon	probe sequence	extinction coefficient
Gapdh-ex-1	CTG ATG AAC CTA AGC TGG GA	197800
Gapdh-ex-2	CGA GGA AAC ACT CTC CTG AG	193700
Gapdh-ex-3	CTT CAC CAT TTT GTC TAC GG	178400
Gapdh-ex-4	AAT ACG GCC AAA TCC GTT CA	197700
Gapdh-ex-5	CAC TTT GCC ACT GCA AAT GG	184000
Gapdh-ex-6	GGT CGT TGA TGG CAA CAA TC	195000
Gapdh-ex-7	GAC CAT GTA GTT GAG GTC AA	204600
Gapdh-ex-8	GTG AGT GGA GTC ATA CTG GA	205400
Gapdh-ex-9	TTG ACT GTG CCG TTG AAT TT	183600
Gapdh-ex-10	TTG ATG ACA AGC TTC CCA TT	186600
Gapdh-ex-11	TGG AAG ATG GTG ATG GGC TT	198300
Gapdh-ex-12	ATT TGA TGT TAG TGG GGT CT	194500
Gapdh-ex-13	AGT AGA CTC CAC GAC ATA CT	199000
Gapdh-ex-14	TTC TCC ATG GTG GTG AAG AC	190900
Gapdh-ex-15	AGA AGG GGC GGA GAT GAT GA	217200
Gapdh-ex-16	ATC ACA AAC ATG GGG GCA TC	200200
Gapdh-ex-17	CAT ATT TCT CGT GGT TCA CA	186700
Gapdh-ex-18	GCT GAC AAT CTT GAG TGA GT	196000
Gapdh-ex-19	CTA AGC AGT TGG TGG TGC AG	195200
Gapdh-ex-20	AGT TGT CAT GGA TGA CCT TG	193800
Gapdh-ex-21	TCA TGA GCC CTT CCA CAA TG	185200
Gapdh-ex-22	TCT TCT GGG TGG CAG TGA TG	186500
Gapdh-ex-23	GAT GCA GGG ATG ATG TTC TG	197600
Gapdh-ex-24	TCA GCT CTG GGA TGA CCT TG	183600
Gapdh-ex-25	TAG GAA CAC GGA AGG CCA TG	205100
Gapdh-ex-26	AGA TCC ACG ACG GAC ACA TT	199600
Gapdh-ex-27	TCA TAC TTG GCA GGT TTC TC	181300
Gapdh-ex-28	CTT CAC CAC CTT CTT GAT GT	173900
Gapdh-ex-29	AGA CAA CCT GGT CCT CAG TG	192200
Gapdh-ex-30	GAG TTG CTG TTG AAG TCG CA	194600
Gapdh-ex-31	CGG CAT CGA AGG TGG AAG AG	206400
Gapdh-ex-32	TTG TCA TTG AGA GCA ATG CC	192200
Gapdh-ex-33	ACC AGG AAA TGA GCT TGA CA	206200
Gapdh-ex-34	CTG TAG CCG TAT TCA TTG TC	184000
		193735
Actb-intron	probe sequence	extinction coefficient
Actin-Intron-1	AGGTACTAGCCACGAGAGAG	209600
Actin-Intron-2	CTGAGTGATCCTCAGGACcc	186100
Actin-Intron-3	tAAAGTTGGCTGTGCCAGTG	192500
Actin-Intron-4	AAAGAGTCTACACGCTAGGC	201200
Actin-Intron-5	AATACGGCTTTTAACACCCG	191300
Actin-Intron-6	CTGTGTACTCTCAAGATGGA	194500
Actin-Intron-7	gcGTGATCGTAGCGTCTGGT	188400
Actin-Intron-8	GGACAAAGACCCAGAGGCca	206300
Actin-Intron-9	AAGCCGAATAGGCAAACCGg	206000
Actin-Intron-10	CGATGCCCAGTGATAGAGAG	204100
Actin-Intron-11	AATACGCACGCGCAGCTAAC	194800
Actin-Intron-12	AGCAGGAAGCGCAAACAAGG	211800
Actin-Intron-13	gaccGGCCGCATTATTACCA	189900
Actin-Intron-14	CAAGCTCAGGGGACAAAGGA	208600
Actin-Intron-15	aaAAGAAGGCTATAGTCACC	209500
		199640
Camk2a-Exon	probe sequence	extinction coefficient
Camk2a-CDS-1	TGA ATC GGG TGC AGG TGA TG	199000
Camk2a-CDS-2	CTC AAA GAG CTG GTA CTC TT	187900
Camk2a-CDS-3	CAC AGA GAA GGC TCC CTT TC	186400
Camk2a-CDS-4	GTG TTG ATA ATC TTG GCA GC	191800
Camk2a-CDS-5	TGA TCT CTG GCT GAA AGC TT	184600
Camk2a-CDS-6	TTC AAC AAG CGG CAG ATG CG	195700
Camk2a-CDS-7	ATG GAG TCG GAC GAT ATT GG	205000
Camk2a-CDS-8	GAA GAT AAG GTA GTG GTG CC	208100
Camk2a-CDS-9	GGC CAC AAT GTC TTC AAA CA	194800
Camk2a-CDS-10	CAG CTT CAC TGT AAT ACT CC	183600
Camk2a-CDS-11	CCA AGA TCT GCT GGA TAC AG	196000
Camk2a-CDS-12	ATC TGG TGA CAG TGT AGC AC	197500
Camk2a-CDS-13	TTC AGG TCA CGA TGC ACC AC	187900
Camk2a-CDS-14	TTC GAG GCC AGC AAC AGA TT	195300
Camk2a-CDS-15	AAA GTC TGC CAG CTT CAC AG	192300
Camk2a-CDS-16	CAC TTC TGG GGA GAG GTA TC	193600
Camk2a-CDS-17	ATA TAC AGG ATG ACG CCA CA	207100
Camk2a-CDS-18	CAG AAC GGG GGA TAC CCA AC	200900
Camk2a-CDS-19	TAC AGG CGA TGC TGG TCT TC	184500
Camk2a-CDS-20	TAG GCA CCA GCT TTG ATC TG	186500
Camk2a-CDS-21	CCA TTC TGG TGA TGG GAA AT	195100
Camk2a-CDS-22	TTA TTG ATC AGA TCC TTG GC	187500
Camk2a-CDS-23	TTG GAC GGG TTG ATG GTC AG	195300
Camk2a-CDS-24	GAT CCA TGG GTG CTT GAG AG	196700
Camk2a-CDS-25	TTG AAC TTC TTC AGG CAG TC	184400
Camk2a-CDS-26	CAG CAT AGT GGT GAG GAT GG	205000
Camk2a-CDS-27	ACC ATC GTT CTT CTT GTT TC	173600
Camk2a-CDS-28	TTG GTG CTC TCA GAA GAT TC	188100
Camk2a-CDS-29	TGT CTT CGT CCT CAA TGG TG	179900
Camk2a-CDS-30	TAA TTT CCT GTT TGC GCA CT	177000
Camk2a-CDS-31	ATC AGC TGC TCT GTC ACT TT	177000
Camk2a-CDS-32	AAA GTC TCC ATT GCT TAT GG	191600
Camk2a-CDS-33	CGC ACA TCT TCG TGT AGG AC	187600
Camk2a-CDS-34	TGG TTC AAA GGC TGT CAT TC	187700
Camk2a-CDS-35	AAT CGA TGA AAG TCC AGG CC	201600
Camk2a-CDS-36	GGG ACC ACA GGT TTT CAA AA	201600
Camk2a-CDS-37	TTC AGG ATG GTG GTG TGC AC	191500
Camk2a-CDS-38	ACC CAT CAG GTG GAT GTG AG	200200
Camk2a-CDS-39	GAT ATA GGC GAT GCA GGC TG	201000
Camk2a-CDS-40	CAT CCA GGT ACT GAG TGA TG	197400
Camk2a-CDS-41	CTG TGG AAG TGG ACG ATC TG	195400
		192529
Znrf3-Intron	probe sequence	extinction coefficient
Znrf3-in-1	CAG ACC CTT GAT GAC TGT TC	184000
Znrf3-in-2	CTT ACC TGA TAC GTA CTA CC	185800
Znrf3-in-3	ATG GGC TAG GGA TGC TCA AG	199900
Znrf3-in-4	GAA CTA TCA CAT CCA AGG GC	197600
Znrf3-in-5	CAC AGA GCC AAA TCA CCA TT	195800
Znrf3-in-6	TGA GCT CCT CAG GAA AGG AG	200400
Znrf3-in-7	AAC AGC TGT TCT CAG TGT AG	195200
Znrf3-in-8	ATA GGC ATC AAG GGA GAC CT	205400
Znrf3-in-9	GTG ATA TCT TAG GAG ATT CA	205100
Znrf3-in-10	CTT CAG TTC TAC CTA TGC TT	176000
Znrf3-in-11	CCC TGG GAA CTA ATT CAC TT	184600
Znrf3-in-12	ATC TGT GAT CTG TGA GGA GT	197900
Znrf3-in-13	CTA TCT CCT AAT CAC CTC AA	184600
Znrf3-in-14	CTT CGA TCT CAG CTC CAC AG	180300
Znrf3-in-15	TCA TTT CCA TCT CCA TCG AG	182100
Znrf3-in-16	TTG TTC CTG CAG CAT GTC AG	183000
Znrf3-in-17	TAA CTG GAG ATG CTC CTT TT	184800
Znrf3-in-18	GAT GTC TGT TTT TGT GTG TT	182400
Znrf3-in-19	TGC TAT CGT GAC TTT TCA GT	182900
Znrf3-in-20	ATC ACG GTC CTT ATA CTA GA	198100
Znrf3-in-21	AAT TGT TTG CTC TCC CAC TT	174800
Znrf3-in-22	AAA GTC CTG ACA GAG GTC AC	202200
Znrf3-in-23	ATC CCT GTG TCT ATC AAA GA	196100
Znrf3-in-24	ACT ATT CTG CAT CTC CTA TG	182300
Znrf3-in-25	TGC TTC ATA TCC CAA AAG CA	193000
Znrf3-in-26	CTA TAT CCA TGA TGT TGG CA	193900
Znrf3-in-27	TCA AAC ATT GCT TTT CAG CC	181800
Znrf3-in-28	TGG CTT CTG TAC TTG ATG AC	182800
Znrf3-in-29	TTT TTG TTT GGC TTC CTC TG	166600
Znrf3-in-30	GTA TAA GGA TCC TTG TCT CA	195600
		189167
Polr2a-Intron22	probe sequence	extinction coefficient
Pol2a-in22-1	TCC CAT TCT ATT TTA TTT CC	174600
Pol2a-in22-2	ACA CAC TGG TAA TCA CAG CA	201600
Pol2a-in22-3	CAG AAT CAC CTA ACT GCA GA	199800
Pol2a-in22-4	CCA TCT TGA CTT GAA GTA GC	189400
Pol2a-in22-5	GCT GCA ACT CTC TCT AAA GT	183900
Pol2a-in22-6	ATT TGG ACT TTT CCT TCT TT	173100
Pol2a-in22-7	CAT GCC TGT TTA TTG TTT CA	181500
Pol2a-in22-8	ATA GTA ACT GAC TCT CCC TA	193200
Pol2a-in22-9	TCT CTG AGT ACT GCC AAA CA	190700
Pol2a-in22-10	CGG AAC TCA ACA GAC CCA AC	195400
Pol2a-in22-11	CAC GGG CAC AAT GGA TCA AT	198900
Pol2a-in22-12	GAT AAA CAG CCT CTT CAG TC	191900
Pol2a-in22-13	ATC ATC TGT AAC TGC AGT GC	190600
Pol2a-in22-14	TTA CCA GCA CCT ACA TAG TG	193400
Pol2a-in22-15	GAG AGA TGG CTC AGT GAC TA	205200
Pol2a-in22-16	TGA GTT AAC ACT GAG GAG CC	199100
Pol2a-in22-17	CTG GTG TGT CTG AAG ACA GA	199200
Pol2a-in22-18	GTA ATG AGA TCT GAT ACC CT	198200
Pol2a-in22-19	GCA CAT GAT GGC TTA TAA CC	194000
Pol2a-in22-20	CTA GAG GTC CTG AGT TCA AA	199400
Pol2a-in22-21	TGG CTC AGC AGT TAA GAA CA	201600
Pol2a-in22-22	AAG AGT TTA AGA CCA GGG CT	205500
Pol2a-in22-23	ATA ACG GGG AGA TGA TGG CA	212300
Pol2a-in22-24	TGC CAG GTA TTG TAA AGC AC	197300
Pol2a-in22-25	CAC ACA CTG TGC AGT ATG TA	196700
Pol2a-in22-26	ATT GGC AGC AAG AGC TTT TG	194100
Pol2a-in22-27	GGG ACT CAA ACT TAG TCC AT	194700
Pol2a-in22-28	TCT CTC TCA ACC ATA TAG GT	187100
Pol2a-in22-29	TGG AAG TCA CAG AAC TCG CA	200700
Pol2a-in22-30	CGG AGT TCT TAA CCA GTG AG	196600
Pol2a-in22-31	ACT TGA GTC CTC TGG GAA AG	194800
Pol2a-in22-32	CAG AGT CTC TCT GTA AAC CA	192800
Pol2a-in22-33	CCA AGA GTG GCT AGA AGA GG	209100
Pol2a-in22-34	TGT GTA TGG GAA TGT CGT CT	192700
Pol2a-in22-35	CAC CCT ACA ACC AAA ATG CA	195900
Pol2a-in22-36	CCA TCC TGC ATA GGA ATG AA	199400
Pol2a-in22-37	CCT CTT TTT AGC TGA GGA TA	187800
Pol2a-in22-38	AGT ATT CTT AGC TGT TGA GC	191900
Pol2a-in22-39	GCC AAG GCT ACA CAG AGA AA	208700
Pol2a-in22-40	AGC CTG GTC TAA AGA GTG AG	204000
Pol2a-in22-41	AAT TAC TGA ACT GGG CGT GG	196900
Pol2a-in22-42	TGG GTC CTC TGT AAA GAC TA	194600
Pol2a-in22-43	ATG TGT CTG GAG TTG GGA AT	199600
Pol2a-in22-44	TTG TGT GTA TGT CTG TGT TC	182600
Pol2a-in22-45	CCC TTA GCT TTT ATG ACA TT	181400
Pol2a-in22-46	AGA ATT GCT TCC TTG TCT TC	178800
Pol2a-in22-47	CCC AAA CTA CAA TTG GCC AA	194500
Pol2a-in22-48	GCA ACA AGA GTG AGG TCA GT	208000
		194858
Akap8I-Intron9	probe sequence	extinction coefficient
Akap8I-in9-1	CGA GAT GGC AGA GCT ATG AC	201400
Akap8I-in9-2	CAT GCA CAG CAG AGC AGG TG	199200
Akap8I-in9-3	GAT GAG TCA GGA CTT GGG AG	204900
Akap8I-in9-4	TGG AAC TTC TGG GTA GTG GT	192500
Akap8I-in9-5	TCG TGT GCT GAG TGA CCT AG	189500
Akap8I-in9-6	GGT CAG CTT TGT CTG AAG AG	194100
Akap8I-in9-7	TGG AAT CAC TGG GCG AGG TG	196500
Akap8I-in9-8	CAG GTC TGG GGG ACT CAA TG	193700
Akap8I-in9-9	CTG AAA AGG TGC TGC ATC TT	188600
Akap8I-in9-10	TGA GGT GCA GAG TGG AGT AC	205200
Akap8I-in9-11	GGG GAC CGG AAG GAA GGA TG	211400
Akap8I-in9-12	TAG GCA GGA GCT TGT GCA TT	192500
Akap8I-in9-13	CGC TGG AAG GTT GTC GGA AG	196600
Akap8I-in9-14	CTA CTA CTG CAA CAG GCA AA	197200
Akap8I-in9-15	CAG GAG GCT GAG ACC TGA AG	201900
Akap8I-in9-16	GAA GAA CTC TTC CTT CCC AC	181600
Akap8I-in9-17	TTA CAG CAA CGT AGG GGT TA	203400
Akap8I-in9-18	GAT AGA TAG TCT GTA GGC TG	203500
Akap8I-in9-19	TGG TAG GGT TGG GAG CAG AA	207700
Akap8I-in9-20	AAA CAG GCC TCG CTC TGA AG	192700
Akap8I-in9-21	CAG GAA AGG TCA CTG CTA CC	193600
		197510
Rad9b-Intron12	probe sequence	extinction coefficient
Rad9b-in12-1	TAA GCA GCT AGA CCT GAG AG	204100
Rad9b-in12-2	CAG GTT TGC ACG TAA TCT AC	190600
Rad9b-in12-3	GAG CTG TTA CGT AAG TGC AT	197600
Rad9b-in12-4	TTG GTG AGA GCG TCC TAC AC	190400
Rad9b-in12-5	CCT GTA ACC GAC TGT ACA CA	191500
Rad9b-in12-6	AGC AAG CAC ACG TTC CTG AG	195100
Rad9b-in12-7	CAG GTT GGT GCT TTT CCA AG	185000
Rad9b-in12-8	TCA CTT CTG AAG CCG CTG AC	180200
Rad9b-in12-9	CTC TGG TTT CAG CTA GAA CG	186800
Rad9b-in12-10	CTC ACT TAG CAG CTA CAG AA	195500
Rad9b-in12-11	CAT TTT CGG ATG GAG TTG GG	193000
Rad9b-in12-12	AAG CCC ATT TTC ATT CAC AG	190300
Rad9b-in12-13	AGC TTC CAC TAA AAG CTT CT	186700
Rad9b-in12-14	AAG GCT GAG ATA GGT GGG CA	209000
Rad9b-in12-15	ATC TTC AGC CTA CGA CAG AG	195500
Rad9b-in12-16	CAG TGT AAA CAT GAG ACT CC	199400
Rad9b-in12-17	CCC GGT AAG ACT GTC TGA AA	196700
Rad9b-in12-18	CAG GGA GAC CTA CAG AGT AG	208800
Rad9b-in12-19	CTA GTG TCG TAG TGT CAC TG	190200
Rad9b-in12-20	CTG GAA GTG CAA AGC TCT GG	192800
Rad9b-in12-21	CTA TGC TAG GAT GTG CAA GG	197700
Rad9b-in12-22	TTC CAG ACA GTA CTG AGT GA	200700
Rad9b-in12-23	ATA GAG GGT TTT GTA GCT GG	200800
Rad9b-in12-24	ACC GAC TGA CAA TTG AGT GT	198300
Rad9b-in12-25	CCG GAA TGG CTA GTT ATC AA	199000
Rad9b-in12-26	AGA TTC TTG GTC TGC CTG AC	183000
Rad9b-in12-27	TGG ACA GGA ACT GAG ACA CC	201300
Rad9b-in12-28	TTT ATA CTA TTT GCC ACT CC	179300
		194261
Srsf2-Intron4	probe sequence	extinction coefficient
srsf2-in4-1	AAA TCT GAA GTC GCT CAC CT	190300
srsf2-in4-2	GGA GGC CAC AAA TTA GGT TA	206900
srsf2-in4-3	GCT GTA CAT GTT TCC TTA TT	181700
srsf2-in4-4	ACA GCT TTA GGC TGT ATG TA	197400
srsf2-in4-5	GGC AAT GTT GAG TCA TTC TG	192300
srsf2-in4-6	ACA CCA ACT TTC ATA GGT TT	191400
srsf2-in4-7	AGA TTA GAA TTG TGT TGG GT	204400
srsf2-in4-8	CAC CTG AGG CAG ATT AAA AC	200900
srsf2-in4-9	ACA GCA ACA AAA TGG CAC AT	206800
srsf2-in4-10	CAG ATT ATC ATA TAG ACC TG	202000
srsf2-in4-11	CCT GAA AAG TCT TTA TAC AA	200400
srsf2-in4-12	TGC ACA AAA ATA CAT AAG AG	215200
srsf2-in4-13	CCT CAA ATA TCC AAT CCA AT	193000
srsf2-in4-14	CAG CAC TAT AAA CAA AAA TG	210400
srsf2-in4-15	GGT AAA TAA CAT ATA TGA AC	215900
		200600

## Sheet: ATTO565-vis
	probe-set name	OD (260)	OD (565)	ε(Oligo) in average	ε(ATTO565)	cf260	% DOL by VIS
set-1	Akap8I-Exon	0.501	0.255	191341	120000	0.27	0.985129
set-2	Cstf1-Exon	0.656	0.315	193581	120000	0.27	0.931384
set-3	Noc2l-Exon	0.861	0.4	195600	120000	0.27	0.90571
set-4	Zfp598-Exon	0.565	0.261	193748	120000	0.27	0.891707
set-5	Neil3-Exon	0.799	0.384	192880	120000	0.27	0.92909
set-6	Slc25a28-Exon	0.724	0.338	194975	120000	0.27	0.908003
set-7	Rad9b-Exon	0.473	0.244	192435	120000	0.27	1.00605
set-8	Gabbr1-Exon	0.632	0.324	195783	120000	0.27	1.01542
set-9	Srsf2-Exon	1.335	0.69	189250	120000	0.27	0.992372
set-10	Znrf3-Exon	1.395	0.71	194788	120000	0.27	1.00203
set-11	Clcn6-Exon	1.31	0.65	197262	120000	0.27	0.9848
set-12	Ybx2-Intron1	1.236	0.61	196948	120000	0.27	0.977224
set-13	Ybx2-Intron4	0.531	0.266	198012	120000	0.27	0.999342
set-14	Ybx2-Exon	0.619	0.314	186950	120000	0.27	0.959784
set-15	Ybx2-Intron2	0.626	0.31	196670	120000	0.27	0.979742
set-16	Ybx2-Intron3	0.528	0.265	197280	120000	0.27	0.997995
set-17	Esyt2-Exon	0.73	0.354	190450	120000	0.27	0.927426
set-18	Dmc1-Exon	0.535	0.271	192156	120000	0.27	0.983646
set-19	Actb-Exon	0.528	0.26	190924	120000	0.27	0.946196
set-20	Gabbr1-Intron5	0.735	0.326	207776	120000	0.27	0.910242
set-21	Polr2a-Exon	0.273	0.122	195721	120000	0.27	0.867003
set-22	Dph1-Exon	0.857	0.365	198436	120000	0.27	0.831896
set-23	Malat1-EVEN	1.364	0.638	190354	120000	0.27	0.889372
set-24	Malat1-ODD	1.573	0.78	191925	120000	0.27	0.958612
set-25	Neat1	0.42	0.2	198909	120000	0.27	0.946763
set-26	Neil3-Intron	0.352	0.176	192423	120000	0.27	0.970245
set-27	Zfp598-Intron	0.332	0.166	197006	120000	0.27	0.99232
set-28	Gapdh-Exon	0.589	0.264	193735	120000	0.27	0.861504
set-29	Actb-Intron	0.57	0.269	199640	120000	0.27	0.940349
set-30	Camk2a-Exon	0.336	0.153	192529	120000	0.27	0.871933
set-31	Znrf3-Intron	0.693	0.31	189167	120000	0.27	0.840195
set-32	Polr2a-Intron22	0.225	0.109	194858	120000	0.27	0.946829
set-33	Akap8I-Intron	1.124	0.526	197510	120000	0.27	0.921811
set-34	Rad9b-Intron	0.286	0.145	194261	120000	0.27	0.994963
set-35	Srsf2-Intron	0.736	0.354	200600	120000	0.27	0.965491

## Sheet: ATTO565-page
ATTO565	% DOL by PAGE
Akap8I-Exon	99.7
Cstf1-Exon	94.8
Noc2l-Exon	93.7
Zfp598-Exon	93.7
Neil3-Exon	95.8
Slc25a28-Exon	94.3
Rad9b-Exon	99.9
Gabbr1-Exon	99.2
Srsf2-Exon	98.5
Znrf3-Exon	99.2
Clcn6-Exon	98.5
Ybx2-Intron1	97.4
Ybx2-Intron4	99.4
Ybx2-Exon	98.2
Ybx2-Intron2	99.2
Ybx2-Intron3	99.5
Esyt2-Exon	91.3
Dmc1-Exon	99.3
Actb-Exon	96.8
Gabbr1-Intron5	91
Polr2a-Exon	87.3
Dph1-Exon	88.6
Malat1-EVEN	90.5
Malat1-ODD	96
Neat1	97.2
Neil3-Intron	98.9
Zfp598-Intron	99.4
Gapdh-Exon	85.4
Actb-Intron	94.2
Camk2a-Exon	87.9
Znrf3-Intron	85.3
Polr2a-Intron22	95.7
Akap8I-Intron	90.5
Rad9b-Intron	99.1
Srsf2-Intron	95.7
