# Supplementary material
Source: HighWire-hosted journal article supplement (doi:10.1101/rna.079591.123)
Supplement: Supplemental_Table_S7.xlsx [file Supplemental_Table_S7.xlsx]

## Sheet: probe-sequences(ATTO647N)
Polr2a-Exon	probe sequence	ε(Oligo)extinction coefficient
Polr2a-1	TTC AAT TCA TCC GGA CTC AG	187900
Polr2a-2	CGT TGT TTC TGG GTA TTT GA	186200
Polr2a-3	AGC GCA AAA CCT TCA TTG TC	189600
Polr2a-4	CAT ACA ACT CTA GGC CAG AG	198200
Polr2a-5	GAG TCC TCA TTA ACA TGC TT	188600
Polr2a-6	TCA GCA AGA TCT TTT TCT CC	179900
Polr2a-7	CTC ATC TGA GAT GCG TTT GA	189600
Polr2a-8	CAC TGT GAC AAT CAT CCA CT	187400
Polr2a-9	AGT CAA TTC GAT CGC CAT TA	196900
Polr2a-10	CTG GGC TTA GGA TGG AAA CG	197700
Polr2a-11	AAA GTA GAC CAG GGG AGG AT	216700
Polr2a-12	CCA GGA AGA CAT CTC TCT TA	192800
Polr2a-13	TTC TTA CAA AGG ATG CCC AT	191300
Polr2a-14	CTG GGA GAT GTT GAT CTT GG	192200
Polr2a-15	CAG GAC CAT AAT CAT CCT TG	192500
Polr2a-16	AAC AGC CGT GTC AAT GAG AC	201600
Polr2a-17	ATC AGC CTT CGC TGA ATA TA	195100
Polr2a-18	CAT CAT ATT TCA CCA TCA CC	185400
Polr2a-19	TTC CAG CTC ATT CTG TAT AT	183900
Polr2a-20	TTC ACG CAT CCG TTC AAA TT	184500
Polr2a-21	TCA CCA GTT GGG AAG ATG AC	199700
Polr2a-22	GCA GAA GGT TAC AAG GGA GG	212500
Polr2a-23	TTT TCT GAG CAT TCC AGA TC	184000
Polr2a-24	TTG CTC AAT TCT TTG ACT CC	173600
Polr2a-25	GGA TCT TAG GTG GAT GTT GA	201400
Polr2a-26	ACC AGC ATA GTG GAA AGT GT	206900
Polr2a-27	CAA AGA ATG TCC TTG GCT CT	186900
Polr2a-28	TAG TAG ATG GCT GTA TTG GC	196700
Polr2a-29	TCA AAG TCG GGC ATC TCA TA	196400
Polr2a-30	CAA TCT GTT CCA TGG TAA GC	190000
Polr2a-31	ACT GTT CAT GAT GCG GAT TC	189800
Polr2a-32	CAT ATC TGT CAG CAT GTT GG	190300
Polr2a-33	TAC CGT GAA GAT CTC CAC AA	197600
Polr2a-34	GTC ATA GTG TCA CAC AGG AG	203800
Polr2a-35	GTT TCC TCA AAG GAG CAT TT	190500
Polr2a-36	CCC AGC ATA ATA TTC TCA GA	196700
Polr2a-37	TAT TTG CAC TTC TCA GCA TC	179900
Polr2a-38	AAG ATG GAG AGG TTG GGG AG	215700
Polr2a-39	GGA GAA TAG CTT GGA GAG GT	209900
Polr2a-40	TAG CTG GGA GAA GTT GGA GA	210000
Polr2a-41	TAG CTT GGT GAA GTT GGT GA	199000
Polr2a-42	TAG TTG GGA CTT GTA GGT GA	201200
Polr2a-43	AAT AGC TTG GAG AGG TTG GG	205300
Polr2a-44	GTG AGG TGG GGG AAT AAC TG	206600
Polr2a-45	GTT GGA GAC TGT GGT GTA TA	202400
Polr2a-46	AAG GAC TAG TTG GGG TGT AC	203700
Polr2a-47	ATT TAG GGC TTG TAG GTG AG	200800
Polr2a-48	CGG GGA GGT TGG AGA ATA TT	205300
		195721
Polr2a-Intron22	probe sequence	extinction coefficient
Pol2a-in22-1	TCC CAT TCT ATT TTA TTT CC	174600
Pol2a-in22-2	ACA CAC TGG TAA TCA CAG CA	201600
Pol2a-in22-3	CAG AAT CAC CTA ACT GCA GA	199800
Pol2a-in22-4	CCA TCT TGA CTT GAA GTA GC	189400
Pol2a-in22-5	GCT GCA ACT CTC TCT AAA GT	183900
Pol2a-in22-6	ATT TGG ACT TTT CCT TCT TT	173100
Pol2a-in22-7	CAT GCC TGT TTA TTG TTT CA	181500
Pol2a-in22-8	ATA GTA ACT GAC TCT CCC TA	193200
Pol2a-in22-9	TCT CTG AGT ACT GCC AAA CA	190700
Pol2a-in22-10	CGG AAC TCA ACA GAC CCA AC	195400
Pol2a-in22-11	CAC GGG CAC AAT GGA TCA AT	198900
Pol2a-in22-12	GAT AAA CAG CCT CTT CAG TC	191900
Pol2a-in22-13	ATC ATC TGT AAC TGC AGT GC	190600
Pol2a-in22-14	TTA CCA GCA CCT ACA TAG TG	193400
Pol2a-in22-15	GAG AGA TGG CTC AGT GAC TA	205200
Pol2a-in22-16	TGA GTT AAC ACT GAG GAG CC	199100
Pol2a-in22-17	CTG GTG TGT CTG AAG ACA GA	199200
Pol2a-in22-18	GTA ATG AGA TCT GAT ACC CT	198200
Pol2a-in22-19	GCA CAT GAT GGC TTA TAA CC	194000
Pol2a-in22-20	CTA GAG GTC CTG AGT TCA AA	199400
Pol2a-in22-21	TGG CTC AGC AGT TAA GAA CA	201600
Pol2a-in22-22	AAG AGT TTA AGA CCA GGG CT	205500
Pol2a-in22-23	ATA ACG GGG AGA TGA TGG CA	212300
Pol2a-in22-24	TGC CAG GTA TTG TAA AGC AC	197300
Pol2a-in22-25	CAC ACA CTG TGC AGT ATG TA	196700
Pol2a-in22-26	ATT GGC AGC AAG AGC TTT TG	194100
Pol2a-in22-27	GGG ACT CAA ACT TAG TCC AT	194700
Pol2a-in22-28	TCT CTC TCA ACC ATA TAG GT	187100
Pol2a-in22-29	TGG AAG TCA CAG AAC TCG CA	200700
Pol2a-in22-30	CGG AGT TCT TAA CCA GTG AG	196600
Pol2a-in22-31	ACT TGA GTC CTC TGG GAA AG	194800
Pol2a-in22-32	CAG AGT CTC TCT GTA AAC CA	192800
Pol2a-in22-33	CCA AGA GTG GCT AGA AGA GG	209100
Pol2a-in22-34	TGT GTA TGG GAA TGT CGT CT	192700
Pol2a-in22-35	CAC CCT ACA ACC AAA ATG CA	195900
Pol2a-in22-36	CCA TCC TGC ATA GGA ATG AA	199400
Pol2a-in22-37	CCT CTT TTT AGC TGA GGA TA	187800
Pol2a-in22-38	AGT ATT CTT AGC TGT TGA GC	191900
Pol2a-in22-39	GCC AAG GCT ACA CAG AGA AA	208700
Pol2a-in22-40	AGC CTG GTC TAA AGA GTG AG	204000
Pol2a-in22-41	AAT TAC TGA ACT GGG CGT GG	196900
Pol2a-in22-42	TGG GTC CTC TGT AAA GAC TA	194600
Pol2a-in22-43	ATG TGT CTG GAG TTG GGA AT	199600
Pol2a-in22-44	TTG TGT GTA TGT CTG TGT TC	182600
Pol2a-in22-45	CCC TTA GCT TTT ATG ACA TT	181400
Pol2a-in22-46	AGA ATT GCT TCC TTG TCT TC	178800
Pol2a-in22-47	CCC AAA CTA CAA TTG GCC AA	194500
Pol2a-in22-48	GCA ACA AGA GTG AGG TCA GT	208000
		194858
Slc25a28-Exon	probe sequence	ε(Oligo)extinction coefficient
Slc25a28-ex-1	CAT GTG CGT GGT GAC AGT GG	193900
Slc25a28-ex-2	ATC GGG TAC ATC ACG CAA TG	198600
Slc25a28-ex-3	CAA CAC GTT CCG ATA GCG GG	193400
Slc25a28-ex-4	CTC ATG ATT CTC CAG AGA GC	189500
Slc25a28-ex-5	CTG TTG CTG TGA CGT TCA GC	179100
Slc25a28-ex-6	CAG GCA AAA TAG AGG GCG TG	207500
Slc25a28-ex-7	CCA TTG GCA ATA TGG CTA TT	190200
Slc25a28-ex-8	TGA AGT AAT GTC GCC ACA CA	200100
Slc25a28-ex-9	TTG ACG ACT TCC GCT GGA TT	181400
Slc25a28-ex-10	TAC GGC GAG TTG TAC ATC TG	192600
Slc25a28-ex-11	CGA ACA CAG TCT GTC ACG CG	189500
Slc25a28-ex-12	CGT GTA GCT GCG GTA AAA GG	199500
Slc25a28-ex-13	AAG GGG ACA TTC ATG GTC AG	204600
Slc25a28-ex-14	AGG TCA TGA AGT GAA TGG CT	204100
Slc25a28-ex-15	GTT AAA GTG CTC TTG CAG GA	196100
Slc25a28-ex-16	CAC AGA GCA CAT GGG AGC TG	198600
Slc25a28-ex-17	TTT ACA AAC GTC CAG TGG GG	195300
Slc25a28-ex-18	GAT TCC TGG GTG TTG AGC AG	192200
Slc25a28-ex-19	CTG TGA TGT GTC CAG TAA TG	194000
Slc25a28-ex-20	CTT GAT AGA CCG TCC TGA AG	192900
Slc25a28-ex-21	CTC GGA AGT AAG CAG TCA CC	195800
Slc25a28-ex-22	GTG GAG GGG ATC TGG TAA AT	205400
Slc25a28-ex-23	CAT ACA CAG ACC ATG CGA TG	198400
Slc25a28-ex-24	CCG CTT TGT GAT TAG GTA TT	186700
		194975
Gabbr1-Intron5	probe sequence	ε(Oligo)extinction coefficient
Gabbr1-in5-1	GGA AGG GTT TCT GAT CTC AC	190900
Gabbr1-in5-2	GTG AAG AGT GAG GGG ATG GG	212900
Gabbr1-in5-3	AGT AAC AGG ACA CCC ACA AC	204200
Gabbr1-in5-4	AAC TAG AAT GGG TGG TGG GA	210500
Gabbr1-in5-5	AAA CAG GTA GGA GAG GAG GG	221800
Gabbr1-in5-6	CGG AAA ACC GCG ATT TGG CG	192500
Gabbr1-in5-7	AGA AAG CTG AGT CCG AGA GG	210300
Gabbr1-in5-8	CAC GAA GGA GAG ATC TGG GA	210200
Gabbr1-in5-9	CAG GTA AAA CCT GGG TAG GG	204400
Gabbr1-in5-10	GTG AAC AGG GTC GAC GGA AC	203700
Gabbr1-in5-11	AGG TGA TGG GAG AAA GGG TC	212300
Gabbr1-in5-12	GAG AAG TGC AGC TTA GGA GA	211800
Gabbr1-in5-13	TTG CAG AAG GGG AGA ACT GG	205200
Gabbr1-in5-14	GAG CGA GAG CGA TGG GAA AG	213700
Gabbr1-in5-15	ATG GAG CGA GGA ACT AAG GG	212400
Gabbr1-in5-16	TGG GTA GGT TAG GAG AGG AA	215500
Gabbr1-in5-17	CAG AGC AAA GAG GGG AAG CG	213200
Gabbr1-in5-18	GGA TTT GGA AGG AGA GAG GA	218400
Gabbr1-in5-19	TCT GCC TAA GGA GAC TAG AG	200000
Gabbr1-in5-20	GGA CAC TTC TTC TGG GGA AG	191200
Gabbr1-in5-21	ATC ACC AGC AGA AGA GGC AG	208200
		207776
Gabbr1-Intron11	probe sequence	ε(Oligo)extinction coefficient
Gabbr1-N-In11-1	ATC AGA AGC CTA CTG TAT GC	195700
Gabbr1-N-In11-2	CTC TGG GAA AAG TGT GCT TC	187400
Gabbr1-N-In11-3	TAT TAA GCA ACC CTC TGA GG	194100
Gabbr1-N-In11-4	TAG AAA ACA AGC CGG GGC TA	206700
Gabbr1-N-In11-5	TAG GTA CAC AGG TTA CGC TA	201500
Gabbr1-N-In11-6	CAG AGC AGA CTG GAG TTC AA	204500
Gabbr1-N-In11-7	GAT TCT AGT CAG GCA TTG TG	194300
Gabbr1-N-In11-8	CAG ATT CCC GAA TCT CAT TT	185800
Gabbr1-N-In11-9	TTT ACC ATA ACC TAC TTC CA	186200
Gabbr1-N-In11-10	ATA GCC AGA ATT CAC ATG GC	199800
Gabbr1-N-In11-11	AGC ATC CTG CTA GAA CAT TG	194400
Gabbr1-N-In11-12	GAT TGT TTT CTT GTC CTG TA	182000
Gabbr1-N-In11-13	TTC TAG GCT TTG GAC ACT TA	186700
Gabbr1-N-In11-14	TAA CAC TTT TAG CTG GGG TC	187700
Gabbr1-N-In11-15	CGC CTA TAA TTT TCC CTA AT	183400
Gabbr1-N-In11-16	ACT CTG ATC CAC TTC TTT TG	175800
Gabbr1-N-In11-17	ATT CTG CTG TTT CTC TAT GG	178500
Gabbr1-N-In11-18	AGG AGT ATG GGA ACT GAT CC	204900
Gabbr1-N-In11-19	GCA ACC TCT GTT GAA AAC CA	193200
Gabbr1-N-In11-20	GTC GGG TTT ATA TCA TCT CG	189300
Gabbr1-N-In11-21	ACT CAG GAC AGT ACA GCT AG	203500
Gabbr1-N-In11-22	TGC TCA GCA TGA TAT TAT CC	189500
Gabbr1-N-In11-23	TCA CCA TAT TGG GAA GGG AT	201500
Gabbr1-N-In11-24	TAG CCA ATC CTC AGT TCA AA	194800
Gabbr1-N-In11-25	CGA GCT AAC ACT TTC TGA GC	186300
Gabbr1-N-In11-26	AAT TGT CCT TAC TTT GTG CG	182600
Gabbr1-N-In11-27	TCA TTA ATA CCA TCC CTC TA	188200
Gabbr1-N-In11-28	CCA GTG TCC AGT GAA TAA GA	205300
Gabbr1-N-In11-29	GGT AGG TTG GAG ATA GTT CA	208100
Gabbr1-N-In11-30	GTG GCT ATA TAT GAC CAC TG	195300
Gabbr1-N-In11-31	CTG TAA TTC TGA CCC CAA AC	186500
Gabbr1-N-In11-32	GAC ATA CTA TAA ATG CCC CT	194500
Gabbr1-N-In11-33	ATC GTT GAG CAC AGC TCA AA	199400
Gabbr1-N-In11-34	AAA GGT CTG GGC TCA ACT AC	194700
Gabbr1-N-In11-35	TTC TAG AAA TAG CTT GGG CC	191600
Gabbr1-N-In11-36	TTC ACA GGC ACA CTC TAA CA	192100
Gabbr1-N-In11-37	GCC TTC CAC ATA ACA GAG AA	201100
Gabbr1-N-In11-38	TGA ATT CCT GAA CCT CTC AG	185700
Gabbr1-N-In11-39	AAG AGA ACT GGC CGT ATA GC	204900
Gabbr1-N-In11-40	AAC GGC AAT CCC TTT AAC TT	187500
Gabbr1-N-In11-41	CAG ATT CAG TCC TAT TCA CA	193000
Gabbr1-N-In11-42	ACA GGA AGC AGT CTT CAC AT	199700
Gabbr1-N-In11-43	ACT TCT CGC TAG TCT GAT AT	186000
Gabbr1-N-In11-44	CCA GGA GGA TTG TTC TTT AG	193400
Gabbr1-N-In11-45	GCT AAC AAC TCC TCC AAT TT	183900
Gabbr1-N-In11-46	CTT AAG AGT GTA CAG CTG CT	192200
Gabbr1-N-In11-47	GGG TAG ACC ATA TGT ACA GA	210900
Gabbr1-N-In11-48	AGC ATT GAA ATG TGC GTG GG	200600
		198237
Gabbr1-Exon	probe sequence	ε(Oligo)extinction coefficient
Gabbr1-ex-1	AGG GCG GAT GTA TAA TCT GG	203800
Gabbr1-ex-2	AAA TTG ATG GCC TTC ACC TG	188300
Gabbr1-ex-3	TCA ATC TCA TAG TCC ACA GG	194000
Gabbr1-ex-4	AAG ACT TGG AGC AGA TTC GG	203000
Gabbr1-ex-5	TGG ATA AGC TTG AGC TCG TA	197300
Gabbr1-ex-6	CAT ACA AGT ACT TGG TGG CT	192600
Gabbr1-ex-7	GGC ATG AGG ATG ATC TTG AT	199900
Gabbr1-ex-8	ACA ATA AGG TTC CAC ATC CG	198200
Gabbr1-ex-9	GGA TGG ATG TGT CCG AAA GA	208100
Gabbr1-ex-10	TTT TCG AAG AGT TTC ACC CG	186500
Gabbr1-ex-11	ATC CAG TGT TGA GGT GAA GA	207800
Gabbr1-ex-12	AAA GTG ATC TCA ATC CCA GC	196300
Gabbr1-ex-13	CTT GAC GCT TCA GGT TTT TA	182300
Gabbr1-ex-14	AAA GTC CCA CGA TGA TTC GA	202000
Gabbr1-ex-15	AAA AAC TTT CCG GGC TTC GG	188900
Gabbr1-ex-16	CAT ACT TCT TCC CAA AGA GC	187100
Gabbr1-ex-17	CAT ACC ACC CGA TGA GAA AC	199100
Gabbr1-ex-18	TTG ACG GGT CAT AGG TTT TG	192100
Gabbr1-ex-19	GTC ATC TCT TCT ACT GTA CA	184100
Gabbr1-ex-20	CAG GGT TCA GCA TGA CAA TC	196300
Gabbr1-ex-21	CAT GTT GGA AAT GCT TCG GG	191600
Gabbr1-ex-22	TTT CTC CAC AAA TTC CTG TG	179400
Gabbr1-ex-23	TGT TCA AGG CCA AAG CCA AG	198000
Gabbr1-ex-24	TGT AGT TAA AGT CCT CCA GG	195900
Gabbr1-ex-25	TTT GGT CTG TAA TGG TCT GG	186600
Gabbr1-ex-26	AAA GAC CAC GTG GCC AGA AA	209200
Gabbr1-ex-27	TAG TAG CCG ATC TTC TTG TA	191100
Gabbr1-ex-28	AAA GAT CAT CCT TGG TGC TG	192800
Gabbr1-ex-29	CGA TCC ACT TGT CTG TTT TG	176800
Gabbr1-ex-30	ACG GAA TGT CTT GAT GAC CA	199400
Gabbr1-ex-31	GCT GGG AGT TCT GGA TAT AA	201400
Gabbr1-ex-32	ACA GCA GTC AGA TTG TTC AG	200500
Gabbr1-ex-33	GCA GAC AAA TGG GAA CTG GC	202000
Gabbr1-ex-34	CTA AAG CCT AAG CCC AAG AG	200100
Gabbr1-ex-35	TAC AGT TTC CAA GGC TCT AG	191000
Gabbr1-ex-36	CAG ATG GCA AGA GTC AGG AT	207700
Gabbr1-ex-37	GGG CAG AAT GGA GAC ATC AA	212000
Gabbr1-ex-38	GAA AAT GCC GAG CCA TGT AT	201500
Gabbr1-ex-39	CAC TTT TGG TCT CAT AAG CA	188200
Gabbr1-ex-40	CTG TGG TCA TTG ATC TTT TC	178200
Gabbr1-ex-41	CGC AAC ATT GTA GAT AGC CA	200600
Gabbr1-ex-42	CAG GAG CGG TAA TGA GAC AC	206300
Gabbr1-ex-43	CTG GCT GGA AAG GAT CAT GG	197500
Gabbr1-ex-44	CAG AGA GGC AAA GGC GAA GG	213200
Gabbr1-ex-45	GCA TCT TAG GCA CAA AGA GC	199100
Gabbr1-ex-46	CAT TCA CCT CGA GTG ATC AA	193400
Gabbr1-ex-47	CTC ATT GTT GTT GGT GGA TG	186500
Gabbr1-ex-48	AAA TGT ACT CGA CTC CCA TC	189900
		195783
Cstf1-Exon	probe sequence	ε(Oligo)extinction coefficient
Cstf1-ex-1	AAA CCC ACT TTG GTT CTG TA	189000
Cstf1-ex-2	ATG ATC AGC TTG TAG AGC TG	197700
Cstf1-ex-3	TAA CCG TCG TAG AGC AGC TG	195400
Cstf1-ex-4	TGA GGC CAT TGG CGA TAC TA	196200
Cstf1-ex-5	CGA CTG GGG CTT GAT CTC AT	183300
Cstf1-ex-6	TTG ATG AGA TGC AGG AGC TG	200300
Cstf1-ex-7	CAG TGT CAT CGT TCT CCA TC	180200
Cstf1-ex-8	CAG AGC GAC CAA TGG CAT AC	198900
Cstf1-ex-9	ATC AAA CTC CAG GTC GAT CC	192300
Cstf1-ex-10	GGT GAC ATT GTT TGA ACG TC	192600
Cstf1-ex-11	AGG TTT CAT ACT CGG AAG CC	193600
Cstf1-ex-12	GCC TTT GTG GGA AGT GAC AT	192900
Cstf1-ex-13	CAG ATC CTG TGG CTA TCA AC	188700
Cstf1-ex-14	CCA GTA TCT TTA TGG AAG CA	197800
Cstf1-ex-15	TTT GGC CAA CAT TCT TTC TG	176600
Cstf1-ex-16	CAT GAC CTC AAT TGG CAT GG	190300
Cstf1-ex-17	TTC TGT TGT GCA GTC TCA TT	178200
Cstf1-ex-18	GGT CGT AAA GAG TTC GGA TC	201700
Cstf1-ex-19	AAG ACA CGT GAC TTC ATC CA	198100
Cstf1-ex-20	GAT CTG TTC TGT TGG GTG AA	192000
Cstf1-ex-21	CAG AGT ATA ATC CCT TGA GC	196300
Cstf1-ex-22	CTC TTT TTG CAG ACG GTT TG	177900
Cstf1-ex-23	GGC TTC CTG AAT GTA TTT GA	190600
Cstf1-ex-24	GTG GAA AGA GAT GGA ACG CA	214500
Cstf1-ex-25	ACC AGG ATG AAG TCT CCA GA	204200
Cstf1-ex-26	GAA GCG TGG GAT GCT GAG TT	198000
Cstf1-ex-27	CAC TGG AAG GTG TTG ATG TC	193700
Cstf1-ex-28	TTA ACG GAG CAG ATG GCA TC	199100
Cstf1-ex-29	GAC GTA CAT GTT GGC ACT AG	196900
Cstf1-ex-30	TGA TGC AGC GGT TGG AGA CG	197100
Cstf1-ex-31	CAT CGT GAG CCT TCT CAA AG	188200
Cstf1-ex-32	TGG AAA TCT CCC AGA GTT TC	190300
Cstf1-ex-33	GTC CGG CAG CAA AAT ATA GT	203100
Cstf1-ex-34	CTA TGC AGC GCA CGA TGT TG	188400
Cstf1-ex-35	ACG TCA TGA AGC CAG GGT TG	198400
Cstf1-ex-36	AAC CGA GCT CGG AAG TCA TC	196400
		193581
Rad9b-Exon	probe sequence	ε(Oligo)extinction coefficient
Rad9b-ex-1	TTC CCA AAT ACT TTC ACC TG	180800
Rad9b-ex-2	ACT CGT GAT AGC GTT TGT AC	192000
Rad9b-ex-3	CTT TCT CGG ATG GGT CTA GC	180700
Rad9b-ex-4	ATT CAC AGA TCT CAG AGC AA	203900
Rad9b-ex-5	GTA GCC ATA CGT GGA ATG AC	201700
Rad9b-ex-6	AGG GTG ACC ACT GAT AAT GT	202400
Rad9b-ex-7	AGT CAG TAT CAC TCA TCG TG	195500
Rad9b-ex-8	GAC TTT ATT GCC AAT TTG CA	188400
Rad9b-ex-9	CAG ACA TCT AAA GAT TGG CA	204600
Rad9b-ex-10	TCC ACA CTT CTT TCA AGG TA	186200
Rad9b-ex-11	TGA CGA CTC TGC ATT TAT CC	182300
Rad9b-ex-12	AAT ACC ATG CTT GCC GAA GA	199200
Rad9b-ex-13	ATT CGC ACA CAG ACT CTT TT	184600
Rad9b-ex-14	ATG TCA GAA GAG CAA TGG CC	204100
Rad9b-ex-15	GCA AAA GTT CCC TGG AGT AA	202200
Rad9b-ex-16	AAT TCC CCA CTC AAA CTC TT	181700
Rad9b-ex-17	ACA CAG AGC TGG TCA AAT CC	197700
Rad9b-ex-18	CGG GCC AAA AGA CAT CTC AC	194000
Rad9b-ex-19	CCC TTC AGT TCT TTA AAG CA	184900
Rad9b-ex-20	TCA CTT CTG AGA AGG TGA GG	198200
Rad9b-ex-21	AAG TAG ATG GCT AGA GGT GC	207800
Rad9b-ex-22	CAA CCG GTT TTC CAG GAA AG	195200
Rad9b-ex-23	GAG CAT GTC TTC AAC ACT CA	192100
Rad9b-ex-24	GTG GCC AAG ATA AAG TTT GC	199600
Rad9b-ex-25	GTT CTA CTC GGA TAA TCC AC	189400
Rad9b-ex-26	GAA AGG GGC AGT AAC TGT GG	206600
Rad9b-ex-27	TGG ACT GTA TGG GGT GTG AC	195000
Rad9b-ex-28	TCT GAC TGA CTC TGC TTT TA	177700
Rad9b-ex-29	TGC TCG AGA GAT GCT CTC TG	183800
Rad9b-ex-30	TCT TGG TTT CAG CTG CAG AG	185100
Rad9b-ex-31	TTC AGG CAC TTC GAA GAT GT	192700
Rad9b-ex-32	TTC CTC CAT GTC ACT AAC AA	187200
Rad9b-ex-33	GCT GTT CAC AAG ATA CAG CT	193700
Rad9b-ex-34	CTC ACT GTC GCT TGC TAC TG	171800
		192435
Akap8I-Exon	probe sequence	ε(Oligo)extinction coefficient
Akap8I-ex-1	GAC AAA ACC TGT GTA GCT CA	198700
Akap8I-ex-2	TGC AAA GTG GTT TCG GAT CC	190100
Akap8I-ex-3	CAC TGG TGT CAC AGT ACG TA	195800
Akap8I-ex-4	CCA TAT CCA TAA TCA CAG GT	197000
Akap8I-ex-5	TAT TTG TCC CAG AGT TCC AA	191500
Akap8I-ex-6	TTT CCC AAG AGT GTG AAG TG	197200
Akap8I-ex-7	TGC ATT TGT GTC AGA GCT AG	192500
Akap8I-ex-8	AAA ACG GAA TCG GCA CTG GC	199200
Akap8I-ex-9	ATC ATA TCT AAG CGC TGG TT	192800
Akap8I-ex-10	CCT CAT AGG AGT CAT ATC TC	190900
Akap8I-ex-11	TCA TAG CTT GAC CGG TAG AG	197500
Akap8I-ex-12	ATT TCC ATC TCA GGG TCA AG	192700
Akap8I-ex-13	CAT CAT ATT GGC CCT CAT AG	189200
Akap8I-ex-14	CAT TCG AAA CTG GTC ACG GT	191300
Akap8I-ex-15	TTG GAC CAA ATG TAT CTC CT	187800
Akap8I-ex-16	CCT GGA ACA TGC CAT ACT CG	186700
Akap8I-ex-17	GCC AAA TCC AAA GCC AAA TC	198100
Akap8I-ex-18	TAC GCC TCA TCT GCT TCA TG	176200
Akap8I-ex-19	ACA AAC TGG ATC CTT TCC AC	187100
Akap8I-ex-20	TCC GGT ATT TGC AGA GAG AA	203000
Akap8I-ex-21	TAC CCA TCT CAT CCT CAT AG	184300
Akap8I-ex-22	TGT GGA ACT TGC TGT CAA GG	191300
Akap8I-ex-23	CTT GGT GCC TAC ATA TTT GA	187600
Akap8I-ex-24	GAA GTC AGC AGT TTG CTT TG	191100
Akap8I-ex-25	TCT TGT TGG TGA CAT ATT CC	183800
Akap8I-ex-26	ACA GTT TTT CGG AGC TCC TC	180900
Akap8I-ex-27	TGG ATC AGA CCA TCA AGG TC	198000
Akap8I-ex-28	GAT CTT GGT CTC TGT AGA TT	187800
Akap8I-ex-29	CTC CAT AGC AAT CTC TTG GG	183900
Akap8I-ex-30	GCC TCT ACC TTC TTC ACA AA	179800
Akap8I-ex-31	GAA AAG GTC ACA GGC TGC AC	199900
Akap8I-ex-32	ATG ATT CCA AAC TGC ATG GG	196500
Akap8I-ex-33	TGA TCC ATC GTC TTG AGA TG	191000
Akap8I-ex-34	CCA TAA GCG AGG ACT TCT TG	191300
Akap8I-ex-35	GTT GTT GAG AAT ACT GCG GG	197200
Akap8I-ex-36	TCC AGC TTC TTG CTA ATG AG	184100
Akap8I-ex-37	GTC AGT GAA AGG ATT CTC GC	195800
		191341
Ybx2-Exon	probe sequence	ε(Oligo)extinction coefficient
Ybx2-ex-1	GCT GTC TGG TGA ACA AAG AC	197100
Ybx2-ex-2	AGT GAC ATT AGC AGC TTC TG	194000
Ybx2-ex-3	ACG TCG ATT AGG GGC ATA GC	199900
Ybx2-ex-4	CGA GGA ATG AAC CTC CGG AA	202400
Ybx2-ex-5	ACC GCC TTC GAT AGA AGA AG	202300
Ybx2-ex-6	GAA GTA GGG ACG GTT TCG TG	201600
Ybx2-ex-7	CAC TGT TGA TAG GCG CGG AG	194300
Ybx2-ex-8	ACT CCG CAG AAA CTT CCT GG	186100
Ybx2-ex-9	ATC ACC CTC CAA TGG TGC TG	183400
Ybx2-ex-10	TTC TCT CCT TCC ACG ACA TC	171100
Ybx2-ex-11	CAC CCG TTC ATC TCC CTG CT	166500
Ybx2-ex-12	CCA CCT TCT GTG GTA GGC TG	178900
Ybx2-ex-13	CTA CCC CAT CAG AGC CCT CT	176300
Ybx2-ex-14	CTC TGC CAC CAT AGG TGG TG	184200
Ybx2-ex-15	TTG ACT GTG CCC AGG ACT TG	183200
Ybx2-ex-16	GGC TGG GCT TGG TCT CTC CA	176000
Ybx2-ex-17	GTA ACC ATT CCG GAC GTT GA	195100
Ybx2-ex-18	CCT TGG TGT CAT TCC TGT TG	174700
Ybx2-ex-19	TCA GGC CGG GAG CCA TCA GT	191000
Ybx2-ex-20	CCT TCG GTA CCT GGG CCG GA	180900
		186950
Ybx2-Intron4	probe sequence	ε(Oligo)extinction coefficient
Ybx2-in4-1	AGA AAC CCA CAT GTT ACT GG	199300
Ybx2-in4-2	TGG AAG TGC TTG GTG AAC TA	198400
Ybx2-in4-3	GGT CCC GTG TAG AAA ACA GA	206800
Ybx2-in4-4	ATT CCA GAG GAC TGA CTG AG	200900
Ybx2-in4-5	GGA TGA GAT AGA GAG AGC CA	218700
Ybx2-in4-6	CCC AGA GTG TAA AGA CAG GA	210800
Ybx2-in4-7	GTC CTT AGA AAT AAC TGC CA	197700
Ybx2-in4-8	TTT GTA CCC ATC TGA GAA GA	197700
Ybx2-in4-9	TCA AAA CCA CTC CTC CTT TG	177900
Ybx2-in4-10	CAA GTC CTC TAC CCT ATC AC	181000
Ybx2-in4-11	ACA AAC CTG CCA GAT CAC TG	193100
Ybx2-in4-12	AGA GGG GGA GCA ATC AGA AC	213700
Ybx2-in4-13	GTG ACA GGG ATG GGT TCT TT	193100
Ybx2-in4-14	ACA TGT CCT AGA GCA GCT CT	190000
Ybx2-in4-15	AGG CAG AGC TGG TCC CAG GA	199800
Ybx2-in4-16	AAC TCC ACC CCA CAG CAG CA	189300
		198012
Ybx2-Intron3	probe sequence	ε(Oligo)extinction coefficient
Ybx2-in3-1	AAA GGC AGC CTA GCT CTT AC	191800
Ybx2-in3-2	AAA GGC TTC CAG AGA GGG AG	209300
Ybx2-in3-3	TGT GTG CAG CTA GGG TTA TG	193500
Ybx2-in3-4	CAG CTA TAG GCA GGC TAC TG	193300
Ybx2-in3-5	AGT TGG GTT AAT GGT GGT TC	196200
Ybx2-in3-6	CTG ACA GCT GTT TAG CAA CT	187100
Ybx2-in3-7	CTT CCT GTG GTG TTA ACA GG	186400
Ybx2-in3-8	AAA CGT GCT GTG CTT CTT AC	183500
Ybx2-in3-9	ATC TCA AGT TGC AAA GTG GG	200400
Ybx2-in3-10	CAA GAG CTA GAG GTC TGA GG	205200
Ybx2-in3-11	CAG CTC CAC AAG ACA GAG AT	201700
Ybx2-in3-12	GGG CAG AGC ATG AAA ATG GT	208100
Ybx2-in3-13	AAA GGT GAG GGC AGC AAA GC	210500
Ybx2-in3-14	GGT TGG GGG GAA AAG TCA TG	205800
Ybx2-in3-15	GAT TCA GGT GAT GCT GCT GC	186400
		197280
Ybx2-Intron2	probe sequence	ε(Oligo)extinction coefficient
Ybx2-in2-1	GTT CGG AAA AAG ACA CCC GT	200200
Ybx2-in2-2	AAA TAA GGT GTC CAA TCC CA	204100
Ybx2-in2-3	CAT CAC AAC CAT GTG CCT TG	184300
Ybx2-in2-4	AGA CTT TCA ACT AGC CTC AG	191700
Ybx2-in2-5	GCC AGT AAG CAT ACA TTT GT	197000
Ybx2-in2-6	CTT GAA GAT GTG GGT GCA GC	193700
Ybx2-in2-7	CCA AGT TCC TGG ATC ATT AA	194100
Ybx2-in2-8	AGA AGA GCT GGG AAG GTC AG	212800
Ybx2-in2-9	AAT GCA GCA ACT CCA GAA GG	203600
Ybx2-in2-10	AAA GGC ACA CAG CAT GCT AA	206000
Ybx2-in2-11	AGG AGC CCC AAA CAT TCT AC	194800
Ybx2-in2-12	CCA GGA AAT CAG TGA GGA CT	203600
Ybx2-in2-13	GGG ATA GAA GTT GTG AGG GT	210100
Ybx2-in2-14	TGG TGC GTG GTT CAA ATG AG	196400
Ybx2-in2-15	CTT CAG TTC TAT CCT TTA GG	181300
Ybx2-in2-16	CTG AAG CAA AGC CTT CTC AG	189700
Ybx2-in2-17	CTT TCC CAG AGC TTG GAA GG	187800
Ybx2-in2-18	TGG CTC TAC TAG GTC AGA AT	193500
Ybx2-in2-19	AAA GAG GGA ACT GAG GCT CC	204100
Ybx2-in2-20	CTT GGA TCT GCA CAA AGG TC	189600
Ybx2-in2-21	CCA TCC CTA GAA CAA ATG TT	193400
Ybx2-in2-22	AGG AGG ACT CCT TGC AGG AA	202000
Ybx2-in2-23	TAC TCT CAG TCT CTG TCA CC	175400
Ybx2-in2-24	AGC TGA ACA AGG GCG AAA GG	210400
Ybx2-in2-25	CAC GAC ATT AGG AGC ATT CT	194800
Ybx2-in2-26	GTT GGA AAA TTC CAC AGG CT	195400
Ybx2-in2-27	GGC GTG GAC TTC CTA AGA AA	199100
Ybx2-in2-28	CAC CAG GGC TCT AAA AGC TG	191500
Ybx2-in2-29	ATG GGC AAG GCA CTC AGT TC	193400
Ybx2-in2-30	ACA GGA TGG GTT GTT AAG GG	206300
		196670
Ybx2-Intron1	probe sequence	ε(Oligo)extinction coefficient
Ybx2-in1-1	TCC GGG ACT AGT TAT GAT TA	198700
Ybx2-in1-2	CCA GCG GAA TCC ACT AAT AG	198400
Ybx2-in1-3	TGA AGG TGC GGC AAG ATT TC	196300
Ybx2-in1-4	AAA GCC TTA GCT GAA CCT GC	189600
Ybx2-in1-5	GGA GGT TTT TAT TTT CCT AC	185300
Ybx2-in1-6	AAA CAG GGG TGT GGC CAG AC	202800
Ybx2-in1-7	GTC AAC TAC ACC AAG TAT CC	194900
Ybx2-in1-8	GGT TTA CCT AAC AAG AAC CG	199000
Ybx2-in1-9	GCC CTC CTA AAT TTA AGA GA	197900
Ybx2-in1-10	AGG GTC AAA ACT CAA CAG CC	200400
Ybx2-in1-11	TAG AAC CGG GTA CTC ACC TG	191700
Ybx2-in1-12	TAC GGA GTT CAG GTC TTT CA	192100
Ybx2-in1-13	CAA ACC CAC GTT CCT CAC AT	183000
Ybx2-in1-14	GGA AAA ACA CAC AGG GGG GT	210700
Ybx2-in1-15	TAC TCT TAA CCC TCT TTC TA	176600
Ybx2-in1-16	GAC TTC GCT GGA AGT GTC AA	195200
Ybx2-in1-17	CCT AAT AAG CTG CGA GTC AA	198800
Ybx2-in1-18	AAG CTA AAA CCT AAC CTG CC	193500
Ybx2-in1-19	TGG GCT GAG TTT TGA GAG AA	202100
Ybx2-in1-20	AGA TGG GGG AAG AGA CGG GA	219400
Ybx2-in1-21	CAG AGA TGC AGT GGG GAT AG	209500
		196948
Gapdh-Exon	probe sequence	extinction coefficient
Gapdh-ex-1	CTG ATG AAC CTA AGC TGG GA	197800
Gapdh-ex-2	CGA GGA AAC ACT CTC CTG AG	193700
Gapdh-ex-3	CTT CAC CAT TTT GTC TAC GG	178400
Gapdh-ex-4	AAT ACG GCC AAA TCC GTT CA	197700
Gapdh-ex-5	CAC TTT GCC ACT GCA AAT GG	184000
Gapdh-ex-6	GGT CGT TGA TGG CAA CAA TC	195000
Gapdh-ex-7	GAC CAT GTA GTT GAG GTC AA	204600
Gapdh-ex-8	GTG AGT GGA GTC ATA CTG GA	205400
Gapdh-ex-9	TTG ACT GTG CCG TTG AAT TT	183600
Gapdh-ex-10	TTG ATG ACA AGC TTC CCA TT	186600
Gapdh-ex-11	TGG AAG ATG GTG ATG GGC TT	198300
Gapdh-ex-12	ATT TGA TGT TAG TGG GGT CT	194500
Gapdh-ex-13	AGT AGA CTC CAC GAC ATA CT	199000
Gapdh-ex-14	TTC TCC ATG GTG GTG AAG AC	190900
Gapdh-ex-15	AGA AGG GGC GGA GAT GAT GA	217200
Gapdh-ex-16	ATC ACA AAC ATG GGG GCA TC	200200
Gapdh-ex-17	CAT ATT TCT CGT GGT TCA CA	186700
Gapdh-ex-18	GCT GAC AAT CTT GAG TGA GT	196000
Gapdh-ex-19	CTA AGC AGT TGG TGG TGC AG	195200
Gapdh-ex-20	AGT TGT CAT GGA TGA CCT TG	193800
Gapdh-ex-21	TCA TGA GCC CTT CCA CAA TG	185200
Gapdh-ex-22	TCT TCT GGG TGG CAG TGA TG	186500
Gapdh-ex-23	GAT GCA GGG ATG ATG TTC TG	197600
Gapdh-ex-24	TCA GCT CTG GGA TGA CCT TG	183600
Gapdh-ex-25	TAG GAA CAC GGA AGG CCA TG	205100
Gapdh-ex-26	AGA TCC ACG ACG GAC ACA TT	199600
Gapdh-ex-27	TCA TAC TTG GCA GGT TTC TC	181300
Gapdh-ex-28	CTT CAC CAC CTT CTT GAT GT	173900
Gapdh-ex-29	AGA CAA CCT GGT CCT CAG TG	192200
Gapdh-ex-30	GAG TTG CTG TTG AAG TCG CA	194600
Gapdh-ex-31	CGG CAT CGA AGG TGG AAG AG	206400
Gapdh-ex-32	TTG TCA TTG AGA GCA ATG CC	192200
Gapdh-ex-33	ACC AGG AAA TGA GCT TGA CA	206200
Gapdh-ex-34	CTG TAG CCG TAT TCA TTG TC	184000
		193735
Noc2l-Intron12-570	probe sequence	ε(Oligo)extinction coefficient
Noc2l-in12-1	AAG TCC AAC ACG AGT TGT GC	197100
Noc2l-in12-2	GTG TGG TTT CCT AAA GAC AT	195400
Noc2l-in12-3	CAC TGG CAG ACA CAG AGA CG	200600
Noc2l-in12-4	TCA CGG GGT CAT TGT TAG AA	198900
Noc2l-in12-5	GAG ACT CAA TGC AGA TCT GT	197800
Noc2l-in12-6	GGT GTC ATA GTA ACT GTG AG	203100
Noc2l-in12-7	GAC AGC GAC TCA AGG TAG AG	207500
Noc2l-in12-8	TTA GCA GGG GCT TGG ATT CA	193800
Noc2l-in12-9	TTA TCC TCG CCA TAG ACT AA	192300
Noc2l-in12-10	GAG CTG GTT ATC AAT ATC CA	199100
Noc2l-in12-11	CTG AGC AAA GGA TGC TAA CT	198000
Noc2l-in12-12	TGG AGG TAG GAA AAG TCC TT	203800
Noc2l-in12-13	ACC AGC TAC AGT GAT TAA TA	206400
Noc2l-in12-14	CGT AAC ATG TTG CTA GAA GG	201000
Noc2l-in12-15	GGA AGC CCT GAT AAG AGA AC	207700
Noc2l-in12-16	CAT AGA GAG GGG AGG TTC TA	209800
Noc2l-in12-17	GAG GCA CAA GGT ACA CAC AG	207700
Noc2l-in12-18	CCA CAC AGA ACA GGT AAA CC	202400
Noc2l-in12-19	TAA CCT CTT GGT CCG AGG AT	188300
Noc2l-in12-20	AAC AAA CCT TGC AGG CTC TA	193700
Noc2l-in12-21	AGG GAG ACT GTG TTT TCC AC	192000
Noc2l-in12-22	CGC CTT TAG ATA CGG ATC TG	188600
Noc2l-in12-23	AAG GAC GCC TGC ATA CAC TT	191900
Noc2l-in12-24	TGA GCC CCT TGA CAG ATA AC	192700
Noc2l-in12-25	TAA GCC CGA GCC AAA GAG AT	204500
		198964
Srsf2-Exon	probe sequence	ε(Oligo)extinction coefficient
Srsf2-ex-1	CGT ATT TCT CGA AGA CGC GC	186400
Srsf2-ex-2	GAA TGT ACA CGT CGC CGA CG	194700
Srsf2-ex-3	TGT CGT GGA ACC GGA CGA AG	199300
Srsf2-ex-4	GAG ACT TGG AGC GGC TGT AG	197700
Srsf2-ex-5	AGG TTG ATC TGG AGC GCG AG	198800
Srsf2-ex-6	ATC TTC GGG CAG ATC TGG AC	190300
Srsf2-ex-7	GAC GGA GGA GGA CTT GGA CT	201600
Srsf2-ex-8	TAG ACT TGG ACT CTC GCT TC	179000
Srsf2-ex-9	TAG GAA GAA ACT GCT CCC TC	191100
Srsf2-ex-10	GGT AGG TCA GGT TGT CCA CC	190900
Srsf2-ex-11	GGG AGG TCA TGC CCT CCA CA	189000
Srsf2-ex-12	GGG ACT CCT TGG TGT AGC GG	188400
Srsf2-ex-13	CCA TGG CGT CCA TGG CGT CT	178200
Srsf2-ex-14	CCT TGA CCT CGA GCG GGA TC	182200
Srsf2-ex-15	AGG GCT TCT CGA TCG CGA CC	183200
Srsf2-ex-16	CTT GGG TGG GCT CTT GGA CC	177200
		189250
Noc2l-Exon	probe sequence	ε(Oligo)extinction coefficient
Noc2l-ex-1	AGG AAC TCG TCC ACA CTG AG	196300
Noc2l-ex-2	GAA CTT GTA GAA CTC GGG GT	198200
Noc2l-ex-3	GAG TCA CTG AAG TCC AGT AG	203200
Noc2l-ex-4	AAC AGC CTG GGA CTA AGG TG	200700
Noc2l-ex-5	GGA ACG CCT GTA CAA CTT CA	192900
Noc2l-ex-6	CTG GAA CCT GCA AGT CTC AG	188600
Noc2l-ex-7	ACC AGA GCA TTG AAC ACA GC	201400
Noc2l-ex-8	ACA GAG GTC TCG AAT GCA GA	206500
Noc2l-ex-9	AAA CAG CAG CTT CTG AAG GC	197200
Noc2l-ex-10	TAT TGC TAT CCT TTG GTG TC	179100
Noc2l-ex-11	CAC AGT GGG CTA CTG GAT GG	193500
Noc2l-ex-12	TAG GTA TGT CTT GAC ATC CA	195400
Noc2l-ex-13	CTG ATA TGC TGC AGG ACA GC	191800
Noc2l-ex-14	TGT CAG GTA GTA AGG AAC CA	208700
Noc2l-ex-15	AAC ATT CGG CAC TGC TTA GG	190900
Noc2l-ex-16	ACA GAA CCA CCA TCC TCT TG	187500
Noc2l-ex-17	AGA CTC TGA TGA GTA CCA GG	202300
Noc2l-ex-18	CAA GGA AGG CTT CCT TCT TG	184600
Noc2l-ex-19	CAT GAT GTA CAT TTG CTT CA	190300
Noc2l-ex-20	TGC ATG AAG CTT ATG AGG GG	199900
Noc2l-ex-21	CAA GGC AAG CAT TTC AGT CA	198600
Noc2l-ex-22	CGT GCT GAT AGG AGA CGC TG	194100
Noc2l-ex-23	AAG CTG TCG GAT GTA GAG GA	209200
Noc2l-ex-24	GTT GTA CAC AGA CTG GTG TG	195700
Noc2l-ex-25	TAG AGG CAG TGC ACA TAC TG	200200
Noc2l-ex-26	TAC TCA GGA CTC GAC ACC AC	189300
Noc2l-ex-27	CAG GAT CTC ACT GGA ACC AA	197100
Noc2l-ex-28	TGA GAG AGG GTA GAG TAG CG	214700
Noc2l-ex-29	CTT GAT ACA GCC AAT GAT GA	200500
Noc2l-ex-30	ATA AAA TCG AGC AGT GGG CA	210700
Noc2l-ex-31	CGT ACA CAA TGC ATG CGC AA	196300
Noc2l-ex-32	TAT GAA GGT GCC GAT GGT CT	194500
Noc2l-ex-33	TCT CGA GAA TGA AGG GCA GG	203900
Noc2l-ex-34	TGA TGG GCT TGG AAC TCA TG	191300
Noc2l-ex-35	CAG GTA TTC CAG AGT AAG GT	204400
Noc2l-ex-36	TTT GCA CTC CCG GAG AAA AG	193900
Noc2l-ex-37	ATC TGG TCA GAC ACG CTG AA	197500
Noc2l-ex-38	TCT TCA CGA ACC TGC TTC TC	171400
Noc2l-ex-39	TGA TCT CTG GGA AGT TCA GG	194100
Noc2l-ex-40	CTC CTC TCT CAA AGA AGT CG	185100
Noc2l-ex-41	ATC CTC TGA ATC GCT GTC AC	181900
Noc2l-ex-42	CAC AGT TCG CTC AGA TCC AC	185300
Noc2l-ex-43	TTC TGA GAG CTG AAG ATC CT	192100
		195600
Gapdh-Intron2	probe sequence	extinction coefficient
Gapdh-in2-1	CAA GAC CTG CGT AGG CAA CG	195500
Gapdh-in2-2	CAA AGG CGG AGT TAC CAG AG	206000
Gapdh-in2-3	GGG GTT GTT CCT AAT ACT TA	193000
Gapdh-in2-4	ATT ACG GGA TGG GTC TGA AC	199400
Gapdh-in2-5	GTA AAG AAA GAA GCC CCG GA	213000
Gapdh-in2-6	AAG GTA TGC ACC TCA CAA CG	198000
Gapdh-in2-7	CAA GCC TGG GAG ATG ATG CG	197200
Gapdh-in2-8	GCC AGT TAC CCT AAA GGA AG	201200
Gapdh-in2-9	CCG AGA GGA ATG AGG TTA GT	208100
Gapdh-in2-10	AGG ATA AAG GAC ACT CCA CC	203000
Gapdh-in2-11	CTC TCT CGA GAG CAC GGA AG	192200
Gapdh-in2-12	GGT GAG ACA GAT TGT GAG GT	206800
Gapdh-in2-13	GAC AAT AAG GCT CAA GGG CT	201500
Gapdh-in2-14	TAG AAT ACG CAT TAT GCC CG	196100
Gapdh-in2-15	CCG CTT TGA TTT TCA GAG AA	190900
Gapdh-in2-16	GGT CAA GCG GAC CTC TGT AA	195100
Gapdh-in2-17	CTG CAC TAC GCC ATA ACT AC	185400
Gapdh-in2-18	TCT TTT CAG AAC CAC CAT GA	189900
Gapdh-in2-19	CTA CTA CAG GAG CCA TTT TG	189900
Gapdh-in2-20	CTT TAC ATC CTG GCC TAT AG	183500
Gapdh-in2-21	GAC ACC CAA TCC TCT TAA TG	188500
Gapdh-in2-22	GAG AAG GGC AGG ATT CTG AG	208000
Gapdh-in2-23	TGG TTT CTG GAG GAT GGA AC	195900
Gapdh-in2-24	ATT TAA CCT CAG ATC AGG GC	195700
Gapdh-in2-25	GAT CCA GAA AGG TCA CAC GG	204000
Gapdh-in2-26	CGG AGC AAC AGA TGT GTG TA	204700
Gapdh-in2-27	GTT CTT CTC GGG CAA AAA TG	190700
Gapdh-in2-28	AGG GCT CGT TCG CGA AAC AC	191700
Gapdh-in2-30	CCC TCG AAC TAA GGG GAA AG	200900
Gapdh-in2-31	TAA AGG TCA GCG TGA GCA GC	200900
Gapdh-in2-32	CAG CAA GCT CAA AGG GCA AG	202800
Gapdh-in2-33	GCA GAC CTG TGA ACT CAT TC	188200
Gapdh-in2-34	GGA AGT TTG TTC CAG CAT GG	194300
Gapdh-in2-35	GTA CAA GCT TGG CAC ATC AC	192300
Gapdh-in2-36	TGA TTG CTT GCC CAG CAA AC	184400
Gapdh-in2-37	GGC TTT TAT AGC ACG GTT AT	191300
Gapdh-in2-38	CCC TAG AAA GTC CAA AGA GA	208800
Gapdh-in2-39	ACC CAA ATA TAG ACT GTT CC	196100
Gapdh-in2-40	GCT AGT TGA ATG CTT GGA TG	193800
Gapdh-in2-41	TTT TGT TCA GAA TTC CCT TT	177900
Gapdh-in2-42	TGT ATG CAT CAG GAA GTT CA	201400
Gapdh-in2-43	AAG CCT TTA TGC AGA CAC AG	198700
Gapdh-in2-44	GCA CGT ACC ACA ACA AAG GT	201200
Gapdh-in2-45	TCT CAT GTT CTT CAG AGT GG	186100
Gapdh-in2-46	AAC TCC TCA TGG GTC TGT AG	189600
Gapdh-in2-47	GAA ACA GGG GAG CTG AGA TC	208100
		196559
Noc2l-intron4	probe sequence	extinction coefficient
Noc2l-in4-1	CAG CTT ATA CTG CTT CTT AC	179400
Noc2l-in4-2	CAA ACG AGG CGA GGC CAG AG	205100
Noc2l-in4-3	TTT TCA CCT GCT GTC TCA GA	178000
Noc2l-in4-4	TGC GCT TCC CAG AAA CAC AG	189500
Noc2l-in4-5	CTG GCA CTT GGA AAG ACC TC	186900
Noc2l-in4-6	TAA GGA GAC GTA GCT GGA GG	209000
Noc2l-in4-7	AGG AAG CAG GCA GGA CTA TG	209300
Noc2l-in4-8	AAC CCT GAT AGA GAG TGT GA	209000
Noc2l-in4-9	CCT ATA TGC AGG TGA GTA AG	203400
Noc2l-in4-10	GAA CTT GCA TAC GGT ACA CC	193500
Noc2l-in4-11	CAG CAA TGT GAG CCA GTT AA	202500
Noc2l-in4-12	GAC ATC ACC GTA CTT TTT GA	190300
Noc2l-in4-13	GAT CAC AAC ACA AGG CCT TT	193700
Noc2l-in4-14	TCC TGG GCT TGA TTT CTA AC	179100
Noc2l-in4-15	AGT GTG ATT ACC TAC AAT GT	199800
Noc2l-in4-16	CCC CAG TGA AGA AAT AAT GC	202100
Noc2l-in4-17	AGG ACA CTG ACT TCA TTT CC	187300
Noc2l-in4-18	CTG CAT TAC AAA CTT GCT CC	179800
Noc2l-in4-19	AAA TAG GTA TTG CGC ACA CC	199400
Noc2l-in4-20	ACT GGA CCA TGA GCC AAC AA	201600
Noc2l-in4-21	AGA GCA ACT GTG GGG CTA AG	203400
Noc2l-in4-22	AAC CTA ACC CAC AAT CTC AG	194100
Noc2l-in4-23	CCT GCT CCA AGT TGA AAA GG	193000
Noc2l-in4-24	AGA GTA GTT CAC AGT ACC TG	202500
Noc2l-in4-25	GGG GCA AGA GAT CAA GAT CA	213000
		196188
mouse-Malat1-odd	probe sequence	extinction coefficient
m-Malat1-1	AAG CCT TCA TGT TAT CTC TT	182600
m-Malat1-3	TTT AAT CTA CAA GGC CGA CC	190900
m-Malat1-5	AAC AGC TTT TTC TTC ACC TT	176500
m-Malat1-7	TGT GGC TGT CTA AAG ACT CT	186800
m-Malat1-9	TTC CTA GTT CAC TGA ATG CA	188700
m-Malat1-11	GTT ACA GAA AAC CAC CAC CA	202100
m-Malat1-13	GCC TTT AGG ATT CTA GAC AG	194900
m-Malat1-15	TAA ACT ACC AGC AAT TCC GC	190900
m-Malat1-17	ATT CAT CCA ACA GCT TCA GA	195900
m-Malat1-19	GCC TTT ACT TAT CAC TCA TT	179000
m-Malat1-21	TTT GCA TAT GCA GCT TTT CA	183900
m-Malat1-23	GAG AAA CCT GTC TGA GGC AA	203000
m-Malat1-25	ACA TGC AAT ACT GCA GAT CC	195900
m-Malat1-27	AGC ACA TAA TGA TCC CTT TC	190800
m-Malat1-29	TCT TTC CTG CCT TAA AGT TA	181800
m-Malat1-31	TGG GGG AAA AGT GTC TTA CC	197100
m-Malat1-33	GCA GAT TGG AAC AGT ACT GC	198700
m-Malat1-35	CGG GTT ACT TAA AGC TGC AG	193200
m-Malat1-37	GAT AGA TGT CTG CTG TTG TC	189500
m-Malat1-39	AAA GAA CTA GGG CTT CCC AA	202500
m-Malat1-41	AAG GTG TTA CGG TAG GGT AG	209500
m-Malat1-43	TAT GCA ACG TGA CCT CAA GG	195700
m-Malat1-45	TAT ACC CAT ACT GGT TTG TT	187200
m-Malat1-47	TCT GTT ATG TCC ACC TGA AA	189100
		191925
Malat1-EVEN	probe sequence	ε(Oligo)extinction coefficient
m-Malat1-2	AAC TTC ACA AAA CCT CCC TT	184600
m-Malat1-4	CAA CTC ATG CCT TCA AAC GT	185200
m-Malat1-6	TGG CAT CCA AAG TTG TCT TA	192000
m-Malat1-8	TAG CTT TGA TTG CTA GCT TC	180600
m-Malat1-10	CTC AAG GAA TGT TAC CGC AC	192200
m-Malat1-12	CAT CTA CCA TTC TTC TTT CT	171100
m-Malat1-14	GAG TGG ATT TCC TTT TTT CT	179300
m-Malat1-16	TCA GCG GCA ACT GGG AAA AC	197900
m-Malat1-18	TTA AAG CCA CTT CCT TTG TT	179500
m-Malat1-20	GGA ACA ATC TCT GGC TCA TG	190200
m-Malat1-22	TTT TAC TCC AGG CTT AAT GC	182000
m-Malat1-24	CTG CTC CGA GAT GGA ATG AA	198600
m-Malat1-26	CTA TTA GCT ATC CCA TCA TG	187800
m-Malat1-28	GCA CAA GTA CAT TGG AGC AC	200300
m-Malat1-30	AGA TGT TTA GCC ATG GTC AA	202100
m-Malat1-32	TGA CCT GAA GTC AAG ACA CC	196800
m-Malat1-34	TTA ATC ATA CTC CAG TCG CG	189300
m-Malat1-36	AGA CTA AAG GCT TCA GTG CT	196300
m-Malat1-38	AAA TGG CAT GTC TGC TTC AC	188000
m-Malat1-40	GGT CTC GAT ACA ATA CTG CT	190800
m-Malat1-42	TGG CGA TGT GGC AGA GAA AT	204000
m-Malat1-44	GGG GAA AAT TGA TGG CCT TT	196100
m-Malat1-46	CCA GCA CTG GTA TCA AAC AT	194800
m-Malat1-48	TCC ACT AAG ATG CTA GCT TG	189000
		190354
mouse-Neat1	probe sequence	extinction coefficient
Neat1-1	ctgtcccaaaatctagtctcc	191200
Neat1-2	gttaaaggcgctttggaagct	202900
Neat1-3	aagcacggaacctaggcaaag	217800
Neat1-4	agtagggaagagtgagaccac	225000
Neat1-5	cccaggggcaaggttttaag	196200
Neat1-6	gcgcagacgttaaagtgtcc	194700
Neat1-7	tcatttacaacccaacagct	189000
Neat1-8	tctaaggaagattcctccac	191700
Neat1-9	cttcccactgttaaaccaca	184600
Neat1-10	tctaccaagtcggcagaatt	194500
Neat1-11	gaacaaaaggggccagaacc	208100
Neat1-12	tcccaagcttgatccataac	187800
Neat1-13	cacaacgggaggcgtttaca	198500
Neat1-14	tgttgtataaggcatgactcc	202500
Neat1-15	ataagcaaaccctgttgtct	192000
Neat1-16	gcaaagcactcatgaggtttc	203100
Neat1-17	aacccacaatggatgtattc	198400
Neat1-18	gtttttaagcaccattcaagc	199900
Neat1-19	caccacttttaagcacactc	182800
Neat1-20	tggttagtgggtttgtacac	192600
Neat1-21	ggtcgagaatgtaacagcca	206400
Neat1-22	aggcctaactatatgaaggca	216300
		198909
Actb-Exon	probe sequence	ε(Oligo)extinction coefficient
Actb-Exon-1	AGC GCA GCG ATA TCG TCA TC	193900
Actb-Exon-2	TAG GAG TCC TTC TGA CCC AT	186200
Actb-Exon-3	CTC TCT TGC TCT GGG CCT CG	163100
Actb-Exon-4	GCC ATG TTC AAT GGG GTA CT	191000
Actb-Exon-5	CTC CAT GTC GTC CCA GTT GG	178800
Actb-Exon-6	GCA GCT CAT TGT AGA AGG TG	199000
Actb-Exon-7	TTC ACG GTT GGC CTT AGG GT	183800
Actb-Exon-8	CTC AAA CAT GAT CTG GGT CA	194500
Actb-Exon-9	TAC GTA CAT GGC TGG GGT GT	192200
Actb-Exon-10	CTG TGG TAC GAC CAG AGG CA	197400
Actb-Exon-11	GTC TCC GGA GTC CAT CAC AA	191300
Actb-Exon-12	GTA GAT GGG CAC AGT GTG GG	202800
Actb-Exon-13	TCA TGA GGT AGT CTG TCA GG	197500
Actb-Exon-14	TTC CCT CTC AGC TGT GGT GG	174700
Actb-Exon-15	AGC ACA GCT TCT CTT TGA TG	184600
Actb-Exon-16	GCC ATC TCC TGC TCG AAG TC	177400
Actb-Exon-17	TTC TCC AGG GAG GAA GAG GA	206200
Actb-Exon-18	CCG CTC GTT GCC AAT AGT GA	187400
Actb-Exon-19	TGG AAA AGA GCC TCA GGG CA	203800
Actb-Exon-20	ATG GAT GCC ACA GGA TTC CA	198700
Actb-Exon-21	GTC ACA CTT CAT GAT GGA AT	196200
Actb-Exon-22	GCA TAG AGG TCT TTA CGG AT	198800
Actb-Exon-23	TAC CAC CAG ACA GCA CTG TG	192100
Actb-Exon-24	GTC AGC AAT GCC TGG GTA CA	194900
Actb-Exon-25	CCA GAG CAG TAA TCT CCT TC	186800
		190924
Actb-intron	probe sequence	extinction coefficient
Actb-Intron-1	AGGTACTAGCCACGAGAGAG	209600
Actb-Intron-2	CTGAGTGATCCTCAGGACcc	186100
Actb-Intron-3	tAAAGTTGGCTGTGCCAGTG	192500
Actb-Intron-4	AAAGAGTCTACACGCTAGGC	201200
Actb-Intron-5	AATACGGCTTTTAACACCCG	191300
Actb-Intron-6	CTGTGTACTCTCAAGATGGA	194500
Actb-Intron-7	gcGTGATCGTAGCGTCTGGT	188400
Actb-Intron-8	GGACAAAGACCCAGAGGCca	206300
Actb-Intron-9	AAGCCGAATAGGCAAACCGg	206000
Actb-Intron-10	CGATGCCCAGTGATAGAGAG	204100
Actb-Intron-11	AATACGCACGCGCAGCTAAC	194800
Actb-Intron-12	AGCAGGAAGCGCAAACAAGG	211800
Actb-Intron-13	gaccGGCCGCATTATTACCA	189900
Actb-Intron-14	CAAGCTCAGGGGACAAAGGA	208600
Actb-Intron-15	aaAAGAAGGCTATAGTCACC	209500
		199640
GFP	probe sequence	ε(Oligo)extinction coefficient
GFP-1	TGAACTTGTGGCCGTTTACG	185300
GFP-2	TAGGTCAGGGTGGTCACGAG	201100
GFP-3	TGGCGGACTTGAAGAAGTCG	198800
GFP-4	CTTGAAGAAGATGGTGCGCT	195100
GFP-5	TTGAAGTCGATGCCCTTCAG	187700
GFP-6	TTGTCGGCCATGATATAGAC	195600
GFP-7	TGCTCAGGTAGTGGTTGTCG	189100
GFP-8	GTCACGAACTCCAGCAGGAC	194200
GFP-9	TCAGCTTGCCGTAGGTGGCA	187500
GFP-10	CTTGCCGGTGGTGCAGATGA	189900
GFP-11	CTGCTTCATGTGGTCGGGGT	180800
GFP-12	GATGCGGTTCACCAGGGTGT	191500
GFP-13	ACTCCAGCTTGTGCCCCAGG	179400
GFP-14	GTTCACCTTGATGCCGTTCT	175800
GFP-15	TCCTCGATGTTGTGGCGGAT	184400
GFP-16	GATGGGGGTGTTCTGCTGGT	187100
GFP-17	GTCTTTGCTCAGGGCGGACT	180900
GFP-18	TGTGATCGCGCTTCTCGTTG	176000
GFP-19	TACAGCTCGTCCATGCCGAG	186500
		187721
Neil3-Exon	probe sequence	ε(Oligo)extinction coefficient
Neil3-ex-1	CTT AGC ATT CAT TGG AGC AG	193000
Neil3-ex-2	ACA GTC TCA AGA GTT TCC AG	197400
Neil3-ex-3	ACG CCA CTG TAA ACA TAT CC	193800
Neil3-ex-4	ATA AAC AGC TCC TTC CCT AA	191600
Neil3-ex-5	GTA AAG CTC TGG GGC CAA AG	198800
Neil3-ex-6	GCC TTT CAT TCC GAA ATG AA	192000
Neil3-ex-7	TCC CGT GGG TTA ATC AAG AT	194900
Neil3-ex-8	CTT CCA TCA CTC TGA CTC TC	169800
Neil3-ex-9	CTT TGG TGA ACA TAT ATC CA	196000
Neil3-ex-10	CTC TCT GCT CTT GAG AAA CT	178300
Neil3-ex-11	CGG ATG AAG ACC ACT GTC AA	201000
Neil3-ex-12	TGT CTG ATA GTT GAC ACA CC	191300
Neil3-ex-13	AAT GCT GAA ATC CCG AGT CA	200000
Neil3-ex-14	GCT TTA CAG CAC CTG TAG AA	195000
Neil3-ex-15	CAG TGT TTA GAA ATG GCA GA	207300
Neil3-ex-16	GAT CAC AGT TAG GAC GCT TG	196500
Neil3-ex-17	CAC AGT AAT TTT GCT GTG GC	186800
Neil3-ex-18	AGC TGG CAT ACT TGA ACA CA	198200
Neil3-ex-19	TGA GTC CGT AAA GCA ATC CT	194700
Neil3-ex-20	CAA ACC ACA CAG GAC CAC TG	195300
Neil3-ex-21	CCG AGG GTC TGT TTA TGA GA	196900
Neil3-ex-22	TGG TCA AGC AAG CAT CAC AG	199800
Neil3-ex-23	TTG AGC ACT GAA TCC AGA GG	198800
Neil3-ex-24	AGG CAA TGG AAT TTT CTC TA	197500
Neil3-ex-25	AGG GTA CTT CAC TAA GTT GT	196700
Neil3-ex-26	CAG TTT TCC TGT TGA TCT TT	175900
Neil3-ex-27	AAC AAG GGT CGT ATT TCC AA	202700
Neil3-ex-28	GCC AAA GCA CTG GAT TTA TT	193600
Neil3-ex-29	GCT GTG AAT CAC TAA AAC CT	194000
Neil3-ex-30	GTT TAT TCC TTC TTT GGA GG	182300
Neil3-ex-31	CCT TAT TGG ATG GTT GAG TT	189400
Neil3-ex-32	GAC TGG GCA CAA ACT GTA GG	199600
Neil3-ex-33	AGT CCA GAG TTG TAA CTT TT	194900
Neil3-ex-34	TGG TTT GGA GTT CAC TGT TA	190600
Neil3-ex-35	ACT TTT GGA ATG ATG GCC AC	191500
Neil3-ex-36	GTG GTG CAT CTT GCA CAG AG	192600
Neil3-ex-37	TTC CTC ACA ACT CGG AGA AC	188800
Neil3-ex-38	TCG GCA GAG AAC AGG CAT AA	208700
Neil3-ex-39	AAA AAA TCC GCA CTG TGC TC	192100
Neil3-ex-40	CTT GCC ATG TCT GCA GAA CG	184100
Neil3-ex-41	TCT TCA GCA CAG TTT TCA TA	188300
Neil3-ex-42	ATT CTT CCC ATT ATT AGG TC	186100
Neil3-ex-43	CAT TTT CGG CCC ACT GGA AA	187100
Neil3-ex-44	CTG GAA CAA TTT CCA TTC CT	183000
		192880
Znrf3-Exon	probe sequence	ε(Oligo)extinction coefficient
Znrf3-N-ex-1	CTC GAC TCG AAC AGC ACC AC	186100
Znrf3-N-ex-2	TGG TGT GGG TGG TAT AGT CG	197300
Znrf3-N-ex-3	AAT TCT GGC TGT TCA AGC TT	184300
Znrf3-N-ex-4	CAG GAC AGT GAG ACA TGG TT	203600
Znrf3-N-ex-5	AAG ATA ACT GCA GTA GCT CC	199600
Znrf3-N-ex-6	TGG CTT CTG GAT TTT CAG AT	184200
Znrf3-N-ex-7	TCT TCT GAG CCT TGG TTT AG	179600
Znrf3-N-ex-8	ATA CAC CAC TGG CCT CTT AA	189100
Znrf3-N-ex-9	CAT CAG CTT GAT AGC ATC TG	190100
Znrf3-N-ex-10	ATC CTT GCT CGA GCT ACT TT	177400
Znrf3-N-ex-11	TCA AAG TAC TCG GTG GGT TG	194500
Znrf3-N-ex-12	ACG ACG AAG AAG GCC AGG AA	215100
Znrf3-N-ex-13	AAT GAG GCA GAC CAA GGA GA	217200
Znrf3-N-ex-14	TCA GCT TGA TTT TGA CAA GG	192600
Znrf3-N-ex-15	GGA ATT CTG ACT ACG ACG TT	193500
Znrf3-N-ex-16	GCT CTT GGA GTT GAA CTT TC	182400
Znrf3-N-ex-17	ACA GAT GGC ACA GTC GGA TG	203300
Znrf3-N-ex-18	TCT CCG TCA ATG TAC TTC TC	176500
Znrf3-N-ex-19	CCG ATG AGT ACA AGG GAT GA	209600
Znrf3-N-ex-20	ATG GAT CCA CAC ACT TCC TG	186500
Znrf3-N-ex-21	TTG TTC TAT GAT GTT GTG CC	181800
Znrf3-N-ex-22	ACA CAA ACA GCA CCT GGA TT	198100
Znrf3-N-ex-23	CAC GTG TAA GGT TGC TTG TC	186500
Znrf3-N-ex-24	TAA TGT ACC GGT AGG GTC AC	198600
Znrf3-N-ex-25	CAT TGG TCC TAT GCA CAC GG	186500
Znrf3-N-ex-26	ATA CTT GTC CTA GTA GGG TA	201000
Znrf3-N-ex-27	CAT GGT TAG CAG TGT GAC AG	199900
Znrf3-N-ex-28	AGA ATA GAG GTT CTG CTC CC	193800
Znrf3-N-ex-29	AAG GGA TGG GCT GGT GAG TA	208400
Znrf3-N-ex-30	CAT ACT GGG AGA AGC AAG CT	201400
Znrf3-N-ex-31	GTA GTA GTG TTG GTA CAT GG	203500
Znrf3-N-ex-32	GTG TGA CGC TGG GTA TTG TC	188600
Znrf3-N-ex-33	GCA ACT GAA GCT AGA TGT GC	197100
Znrf3-N-ex-34	TAG CCG CTA CAC ACA GAA CG	196000
Znrf3-N-ex-35	ATA CAC ACC TTG GTT GCT GA	190800
Znrf3-N-ex-36	AGC TTC GGA AGG TGG AAC AG	204400
Znrf3-N-ex-37	CGG TAG ATG AAG GGG TCA TA	209800
Znrf3-N-ex-38	AGC ACT TTG ACT GTG TCC TG	182700
Znrf3-N-ex-39	CTT CTG AGG TAG AGC TGT TG	189500
Znrf3-N-ex-40	CGA AGC AGC AAG CAC ATG AT	202600
Znrf3-N-ex-41	CAC TTG TTT CTA TCC CAG AG	183900
Znrf3-N-ex-42	AGG ACC CAG GAA TAA ACT GC	204300
Znrf3-N-ex-43	CTG AGT GAA GAC CAT ACA GG	204800
Znrf3-N-ex-44	CCA TCT GTC CTA GGA TAA TG	192300
Znrf3-N-ex-45	GAG TGT GTA CTG TAC ACT CA	197200
Znrf3-N-ex-46	GAA TAA TGG GGA TGC GCT GG	201700
Znrf3-N-ex-47	AAG TCA CAG TCT ACA TCC TC	191500
Znrf3-N-ex-48	GCA TGA GAC TCC TGA GTG TC	190600
		194788

## Sheet: ATTO647N-vis
	probe-set name	OD (260)	OD (647)	ε(Oligo) in average	ε(ATTO647N)	cf260	% DOL by VIS
set-1	Polr2a-Exon	0.727	0.603	195721	187000	0.04	0.939197
set-2	Polr2a-intron	0.757	0.633	194858	187000	0.04	0.943125
set-3	Slc25a28-exon	0.522	0.445	194975	187000	0.04	0.962703
set-4	Gabbr1-in5	0.525	0.437	207776	187000	0.04	0.998156
set-5	Gabbr1-in11	1.164	1.001	198237	187000	0.04	0.986982
set-6	Gabbr1-Exon	1.376	1.172	195783	187000	0.04	0.965643
set-7	Cstf1-Exon	1.398	1.18	193581	187000	0.04	0.94634
set-8	Rad9b-Exon	1.192	1.021	192435	187000	0.04	0.955397
set-9	Akap8I-Exon	0.621	0.554	190450	187000	0.04	0.986714
set-10	Ybx2-Exon	0.474	0.425	186950	187000	0.04	0.974488
set-11	Ybx2-in4	0.435	0.368	198012	187000	0.04	0.969313
set-12	Ybx2-in3	0.42	0.355	197280	187000	0.04	0.96501
set-13	Ybx2-in2	0.264	0.221	196670	187000	0.04	0.952597
set-14	Ybx2-in1	0.928	0.784	196948	187000	0.04	0.962971
set-15	Gapdh-exon	0.984	0.816	193735	187000	0.04	0.929893
set-16	Noc2l-in12	1.04	0.871	198964	187000	0.04	0.963673
set-17	Srsf2-exon	0.341	0.305	189250	187000	0.04	0.983421
set-18	Noc2l-Exon	0.934	0.804	195600	187000	0.04	0.975418
set-19	Gapdh-intron	0.984	0.815	196559	187000	0.04	0.941648
set-20	Noc2l-in4	1.409	1.192	196188	187000	0.04	0.960785
set-21	Malat1-odd	1.279	1.114	191925	187000	0.04	0.969633
set-22	Malat1-even	1.15	0.933	190354	187000	0.04	0.893913
set-23	Neat1	1.066	0.81	198909	187000	0.04	0.871293
set-24	Actb-exon	0.527	0.454	190924	187000	0.04	0.953889
set-25	Actb-intron	0.548	0.436	199640	187000	0.04	0.91687
set-26	GFP	0.439	0.365	187721	187000	0.04	0.904746
set-27	Neil3-exon	0.465	0.395	192529	187000	0.04	0.947663
set-28	Znrf3-exon	0.462	0.371	194788	187000	0.04	0.904163

## Sheet: ATTO647N-page
ATTO647N	DOL by PAGE
Polr2a-Exon	0.937893
Polr2a-intron	0.921929
Slc25a28-exon	0.965642
Gabbr1-in5	0.994198
Gabbr1-in11	0.971099
Gabbr1-Exon	0.95423
Cstf1-Exon	0.949083
Rad9b-Exon	0.935201
Akap8I-Exon	0.975007
Ybx2-Exon	0.962539
Ybx2-in4	0.959042
Ybx2-in3	0.958602
Ybx2-in2	0.948175
Ybx2-in1	0.95237
Gapdh-exon	0.951229
Noc2l-in12	0.922389
Srsf2-exon	0.973343
Noc2l-Exon	0.958424
Gapdh-intron	0.92002
Noc2l-in4	0.974719
Malat1-odd	0.963258
Malat1-even	0.903366
Neat1	0.856247
Actb-exon	0.937048
Actb-intron	0.910208
GFP	0.922445
Neil3-exon	0.945113
Znrf3-exon	0.874981
