# Supplementary material
Source: HighWire-hosted journal article supplement (doi:10.1101/rna.079591.123)
Supplement: Supplemental_Table_S8.xlsx [file Supplemental_Table_S8.xlsx]

## Sheet: probe-sequences(Alexa568)
GFP	probe sequence	ε(Oligo)extinction coefficient
GFP-1	TGAACTTGTGGCCGTTTACG	185300
GFP-2	TAGGTCAGGGTGGTCACGAG	201100
GFP-3	TGGCGGACTTGAAGAAGTCG	198800
GFP-4	CTTGAAGAAGATGGTGCGCT	195100
GFP-5	TTGAAGTCGATGCCCTTCAG	187700
GFP-6	TTGTCGGCCATGATATAGAC	195600
GFP-7	TGCTCAGGTAGTGGTTGTCG	189100
GFP-8	GTCACGAACTCCAGCAGGAC	194200
GFP-9	TCAGCTTGCCGTAGGTGGCA	187500
GFP-10	CTTGCCGGTGGTGCAGATGA	189900
GFP-11	CTGCTTCATGTGGTCGGGGT	180800
GFP-12	GATGCGGTTCACCAGGGTGT	191500
GFP-13	ACTCCAGCTTGTGCCCCAGG	179400
GFP-14	GTTCACCTTGATGCCGTTCT	175800
GFP-15	TCCTCGATGTTGTGGCGGAT	184400
GFP-16	GATGGGGGTGTTCTGCTGGT	187100
GFP-17	GTCTTTGCTCAGGGCGGACT	180900
GFP-18	TGTGATCGCGCTTCTCGTTG	176000
GFP-19	TACAGCTCGTCCATGCCGAG	186500
		187721
Polr2a-odd-exon	probe sequence	extinction coefficient
Polr2a-1	TTC AAT TCA TCC GGA CTC AG	187900
Polr2a-3	AGC GCA AAA CCT TCA TTG TC	189600
Polr2a-5	GAG TCC TCA TTA ACA TGC TT	188600
Polr2a-7	CTC ATC TGA GAT GCG TTT GA	189600
Polr2a-9	AGT CAA TTC GAT CGC CAT TA	196900
Polr2a-11	AAA GTA GAC CAG GGG AGG AT	216700
Polr2a-13	TTC TTA CAA AGG ATG CCC AT	191300
Polr2a-15	CAG GAC CAT AAT CAT CCT TG	192500
Polr2a-17	ATC AGC CTT CGC TGA ATA TA	195100
Polr2a-19	TTC CAG CTC ATT CTG TAT AT	183900
Polr2a-21	TCA CCA GTT GGG AAG ATG AC	199700
Polr2a-23	TTT TCT GAG CAT TCC AGA TC	184000
Polr2a-25	GGA TCT TAG GTG GAT GTT GA	201400
Polr2a-27	CAA AGA ATG TCC TTG GCT CT	186900
Polr2a-29	TCA AAG TCG GGC ATC TCA TA	196400
Polr2a-31	ACT GTT CAT GAT GCG GAT TC	189800
Polr2a-33	TAC CGT GAA GAT CTC CAC AA	197600
Polr2a-35	GTT TCC TCA AAG GAG CAT TT	190500
Polr2a-37	TAT TTG CAC TTC TCA GCA TC	179900
Polr2a-39	GGA GAA TAG CTT GGA GAG GT	209900
Polr2a-41	TAG CTT GGT GAA GTT GGT GA	199000
Polr2a-43	AAT AGC TTG GAG AGG TTG GG	205300
Polr2a-45	GTT GGA GAC TGT GGT GTA TA	202400
Polr2a-47	ATT TAG GGC TTG TAG GTG AG	200800
		194821
Polr2a-Exon-even-670	probe sequence	extinction coefficient
Polr2a-2	CGT TGT TTC TGG GTA TTT GA	186200
Polr2a-4	CAT ACA ACT CTA GGC CAG AG	198200
Polr2a-6	TCA GCA AGA TCT TTT TCT CC	179900
Polr2a-8	CAC TGT GAC AAT CAT CCA CT	187400
Polr2a-10	CTG GGC TTA GGA TGG AAA CG	197700
Polr2a-12	CCA GGA AGA CAT CTC TCT TA	192800
Polr2a-14	CTG GGA GAT GTT GAT CTT GG	192200
Polr2a-16	AAC AGC CGT GTC AAT GAG AC	201600
Polr2a-18	CAT CAT ATT TCA CCA TCA CC	185400
Polr2a-20	TTC ACG CAT CCG TTC AAA TT	184500
Polr2a-22	GCA GAA GGT TAC AAG GGA GG	212500
Polr2a-24	TTG CTC AAT TCT TTG ACT CC	173600
Polr2a-26	ACC AGC ATA GTG GAA AGT GT	206900
Polr2a-28	TAG TAG ATG GCT GTA TTG GC	196700
Polr2a-30	CAA TCT GTT CCA TGG TAA GC	190000
Polr2a-32	CAT ATC TGT CAG CAT GTT GG	190300
Polr2a-34	GTC ATA GTG TCA CAC AGG AG	203800
Polr2a-36	CCC AGC ATA ATA TTC TCA GA	196700
Polr2a-38	AAG ATG GAG AGG TTG GGG AG	215700
Polr2a-40	TAG CTG GGA GAA GTT GGA GA	210000
Polr2a-42	TAG TTG GGA CTT GTA GGT GA	201200
Polr2a-44	GTG AGG TGG GGG AAT AAC TG	206600
Polr2a-46	AAG GAC TAG TTG GGG TGT AC	203700
Polr2a-48	CGG GGA GGT TGG AGA ATA TT	205300
		196621
Actb-quasar670	probe sequence	extinction coefficient
Actb-Exon-1	AGC GCA GCG ATA TCG TCA TC	193900
Actb-Exon-2	TAG GAG TCC TTC TGA CCC AT	186200
Actb-Exon-3	CTC TCT TGC TCT GGG CCT CG	163100
Actb-Exon-4	GCC ATG TTC AAT GGG GTA CT	191000
Actb-Exon-5	CTC CAT GTC GTC CCA GTT GG	178800
Actb-Exon-6	GCA GCT CAT TGT AGA AGG TG	199000
Actb-Exon-7	TTC ACG GTT GGC CTT AGG GT	183800
Actb-Exon-8	CTC AAA CAT GAT CTG GGT CA	194500
Actb-Exon-9	TAC GTA CAT GGC TGG GGT GT	192200
Actb-Exon-10	CTG TGG TAC GAC CAG AGG CA	197400
Actb-Exon-11	GTC TCC GGA GTC CAT CAC AA	191300
Actb-Exon-12	GTA GAT GGG CAC AGT GTG GG	202800
Actb-Exon-13	TCA TGA GGT AGT CTG TCA GG	197500
Actb-Exon-14	TTC CCT CTC AGC TGT GGT GG	174700
Actb-Exon-15	AGC ACA GCT TCT CTT TGA TG	184600
Actb-Exon-16	GCC ATC TCC TGC TCG AAG TC	177400
Actb-Exon-17	TTC TCC AGG GAG GAA GAG GA	206200
Actb-Exon-18	CCG CTC GTT GCC AAT AGT GA	187400
Actb-Exon-19	TGG AAA AGA GCC TCA GGG CA	203800
Actb-Exon-20	ATG GAT GCC ACA GGA TTC CA	198700
Actb-Exon-21	GTC ACA CTT CAT GAT GGA AT	196200
Actb-Exon-22	GCA TAG AGG TCT TTA CGG AT	198800
Actb-Exon-23	TAC CAC CAG ACA GCA CTG TG	192100
Actb-Exon-24	GTC AGC AAT GCC TGG GTA CA	194900
Actb-Exon-25	CCA GAG CAG TAA TCT CCT TC	186800
		190924
Actb-intron	probe sequence	extinction coefficient
Actb-Intron-1	AGGTACTAGCCACGAGAGAG	209600
Actb-Intron-2	CTGAGTGATCCTCAGGACcc	186100
Actb-Intron-3	tAAAGTTGGCTGTGCCAGTG	192500
Actb-Intron-4	AAAGAGTCTACACGCTAGGC	201200
Actb-Intron-5	AATACGGCTTTTAACACCCG	191300
Actb-Intron-6	CTGTGTACTCTCAAGATGGA	194500
Actb-Intron-7	gcGTGATCGTAGCGTCTGGT	188400
Actb-Intron-8	GGACAAAGACCCAGAGGCca	206300
Actb-Intron-9	AAGCCGAATAGGCAAACCGg	206000
Actb-Intron-10	CGATGCCCAGTGATAGAGAG	204100
Actb-Intron-11	AATACGCACGCGCAGCTAAC	194800
Actb-Intron-12	AGCAGGAAGCGCAAACAAGG	211800
Actb-Intron-13	gaccGGCCGCATTATTACCA	189900
Actb-Intron-14	CAAGCTCAGGGGACAAAGGA	208600
Actb-Intron-15	aaAAGAAGGCTATAGTCACC	209500
		199640
Gapdh-Exon	probe sequence	extinction coefficient
Gapdh-ex-1	CTG ATG AAC CTA AGC TGG GA	197800
Gapdh-ex-2	CGA GGA AAC ACT CTC CTG AG	193700
Gapdh-ex-3	CTT CAC CAT TTT GTC TAC GG	178400
Gapdh-ex-4	AAT ACG GCC AAA TCC GTT CA	197700
Gapdh-ex-5	CAC TTT GCC ACT GCA AAT GG	184000
Gapdh-ex-6	GGT CGT TGA TGG CAA CAA TC	195000
Gapdh-ex-7	GAC CAT GTA GTT GAG GTC AA	204600
Gapdh-ex-8	GTG AGT GGA GTC ATA CTG GA	205400
Gapdh-ex-9	TTG ACT GTG CCG TTG AAT TT	183600
Gapdh-ex-10	TTG ATG ACA AGC TTC CCA TT	186600
Gapdh-ex-11	TGG AAG ATG GTG ATG GGC TT	198300
Gapdh-ex-12	ATT TGA TGT TAG TGG GGT CT	194500
Gapdh-ex-13	AGT AGA CTC CAC GAC ATA CT	199000
Gapdh-ex-14	TTC TCC ATG GTG GTG AAG AC	190900
Gapdh-ex-15	AGA AGG GGC GGA GAT GAT GA	217200
Gapdh-ex-16	ATC ACA AAC ATG GGG GCA TC	200200
Gapdh-ex-17	CAT ATT TCT CGT GGT TCA CA	186700
Gapdh-ex-18	GCT GAC AAT CTT GAG TGA GT	196000
Gapdh-ex-19	CTA AGC AGT TGG TGG TGC AG	195200
Gapdh-ex-20	AGT TGT CAT GGA TGA CCT TG	193800
Gapdh-ex-21	TCA TGA GCC CTT CCA CAA TG	185200
Gapdh-ex-22	TCT TCT GGG TGG CAG TGA TG	186500
Gapdh-ex-23	GAT GCA GGG ATG ATG TTC TG	197600
Gapdh-ex-24	TCA GCT CTG GGA TGA CCT TG	183600
Gapdh-ex-25	TAG GAA CAC GGA AGG CCA TG	205100
Gapdh-ex-26	AGA TCC ACG ACG GAC ACA TT	199600
Gapdh-ex-27	TCA TAC TTG GCA GGT TTC TC	181300
Gapdh-ex-28	CTT CAC CAC CTT CTT GAT GT	173900
Gapdh-ex-29	AGA CAA CCT GGT CCT CAG TG	192200
Gapdh-ex-30	GAG TTG CTG TTG AAG TCG CA	194600
Gapdh-ex-31	CGG CAT CGA AGG TGG AAG AG	206400
Gapdh-ex-32	TTG TCA TTG AGA GCA ATG CC	192200
Gapdh-ex-33	ACC AGG AAA TGA GCT TGA CA	206200
Gapdh-ex-34	CTG TAG CCG TAT TCA TTG TC	184000
		193735
Gapdh-Intron2	probe sequence	extinction coefficient
Gapdh-in2-1	CAA GAC CTG CGT AGG CAA CG	195500
Gapdh-in2-2	CAA AGG CGG AGT TAC CAG AG	206000
Gapdh-in2-3	GGG GTT GTT CCT AAT ACT TA	193000
Gapdh-in2-4	ATT ACG GGA TGG GTC TGA AC	199400
Gapdh-in2-5	GTA AAG AAA GAA GCC CCG GA	213000
Gapdh-in2-6	AAG GTA TGC ACC TCA CAA CG	198000
Gapdh-in2-7	CAA GCC TGG GAG ATG ATG CG	197200
Gapdh-in2-8	GCC AGT TAC CCT AAA GGA AG	201200
Gapdh-in2-9	CCG AGA GGA ATG AGG TTA GT	208100
Gapdh-in2-10	AGG ATA AAG GAC ACT CCA CC	203000
Gapdh-in2-11	CTC TCT CGA GAG CAC GGA AG	192200
Gapdh-in2-12	GGT GAG ACA GAT TGT GAG GT	206800
Gapdh-in2-13	GAC AAT AAG GCT CAA GGG CT	201500
Gapdh-in2-14	TAG AAT ACG CAT TAT GCC CG	196100
Gapdh-in2-15	CCG CTT TGA TTT TCA GAG AA	190900
Gapdh-in2-16	GGT CAA GCG GAC CTC TGT AA	195100
Gapdh-in2-17	CTG CAC TAC GCC ATA ACT AC	185400
Gapdh-in2-18	TCT TTT CAG AAC CAC CAT GA	189900
Gapdh-in2-19	CTA CTA CAG GAG CCA TTT TG	189900
Gapdh-in2-20	CTT TAC ATC CTG GCC TAT AG	183500
Gapdh-in2-21	GAC ACC CAA TCC TCT TAA TG	188500
Gapdh-in2-22	GAG AAG GGC AGG ATT CTG AG	208000
Gapdh-in2-23	TGG TTT CTG GAG GAT GGA AC	195900
Gapdh-in2-24	ATT TAA CCT CAG ATC AGG GC	195700
Gapdh-in2-25	GAT CCA GAA AGG TCA CAC GG	204000
Gapdh-in2-26	CGG AGC AAC AGA TGT GTG TA	204700
Gapdh-in2-27	GTT CTT CTC GGG CAA AAA TG	190700
Gapdh-in2-28	AGG GCT CGT TCG CGA AAC AC	191700
Gapdh-in2-30	CCC TCG AAC TAA GGG GAA AG	200900
Gapdh-in2-31	TAA AGG TCA GCG TGA GCA GC	200900
Gapdh-in2-32	CAG CAA GCT CAA AGG GCA AG	202800
Gapdh-in2-33	GCA GAC CTG TGA ACT CAT TC	188200
Gapdh-in2-34	GGA AGT TTG TTC CAG CAT GG	194300
Gapdh-in2-35	GTA CAA GCT TGG CAC ATC AC	192300
Gapdh-in2-36	TGA TTG CTT GCC CAG CAA AC	184400
Gapdh-in2-37	GGC TTT TAT AGC ACG GTT AT	191300
Gapdh-in2-38	CCC TAG AAA GTC CAA AGA GA	208800
Gapdh-in2-39	ACC CAA ATA TAG ACT GTT CC	196100
Gapdh-in2-40	GCT AGT TGA ATG CTT GGA TG	193800
Gapdh-in2-41	TTT TGT TCA GAA TTC CCT TT	177900
Gapdh-in2-42	TGT ATG CAT CAG GAA GTT CA	201400
Gapdh-in2-43	AAG CCT TTA TGC AGA CAC AG	198700
Gapdh-in2-44	GCA CGT ACC ACA ACA AAG GT	201200
Gapdh-in2-45	TCT CAT GTT CTT CAG AGT GG	186100
Gapdh-in2-46	AAC TCC TCA TGG GTC TGT AG	189600
Gapdh-in2-47	GAA ACA GGG GAG CTG AGA TC	208100
		196559
Malat1-odd	probe sequence	extinction coefficient
m-Malat1-1	AAG CCT TCA TGT TAT CTC TT	182600
m-Malat1-3	TTT AAT CTA CAA GGC CGA CC	190900
m-Malat1-5	AAC AGC TTT TTC TTC ACC TT	176500
m-Malat1-7	TGT GGC TGT CTA AAG ACT CT	186800
m-Malat1-9	TTC CTA GTT CAC TGA ATG CA	188700
m-Malat1-11	GTT ACA GAA AAC CAC CAC CA	202100
m-Malat1-13	GCC TTT AGG ATT CTA GAC AG	194900
m-Malat1-15	TAA ACT ACC AGC AAT TCC GC	190900
m-Malat1-17	ATT CAT CCA ACA GCT TCA GA	195900
m-Malat1-19	GCC TTT ACT TAT CAC TCA TT	179000
m-Malat1-21	TTT GCA TAT GCA GCT TTT CA	183900
m-Malat1-23	GAG AAA CCT GTC TGA GGC AA	203000
m-Malat1-25	ACA TGC AAT ACT GCA GAT CC	195900
m-Malat1-27	AGC ACA TAA TGA TCC CTT TC	190800
m-Malat1-29	TCT TTC CTG CCT TAA AGT TA	181800
m-Malat1-31	TGG GGG AAA AGT GTC TTA CC	197100
m-Malat1-33	GCA GAT TGG AAC AGT ACT GC	198700
m-Malat1-35	CGG GTT ACT TAA AGC TGC AG	193200
m-Malat1-37	GAT AGA TGT CTG CTG TTG TC	189500
m-Malat1-39	AAA GAA CTA GGG CTT CCC AA	202500
m-Malat1-41	AAG GTG TTA CGG TAG GGT AG	209500
m-Malat1-43	TAT GCA ACG TGA CCT CAA GG	195700
m-Malat1-45	TAT ACC CAT ACT GGT TTG TT	187200
m-Malat1-47	TCT GTT ATG TCC ACC TGA AA	189100
		191925
Malat1-even	probe sequence	extinction coefficient
m-Malat1-2	AAC TTC ACA AAA CCT CCC TT	184600
m-Malat1-4	CAA CTC ATG CCT TCA AAC GT	185200
m-Malat1-6	TGG CAT CCA AAG TTG TCT TA	192000
m-Malat1-8	TAG CTT TGA TTG CTA GCT TC	180600
m-Malat1-10	CTC AAG GAA TGT TAC CGC AC	192200
m-Malat1-12	CAT CTA CCA TTC TTC TTT CT	171100
m-Malat1-14	GAG TGG ATT TCC TTT TTT CT	179300
m-Malat1-16	TCA GCG GCA ACT GGG AAA AC	197900
m-Malat1-18	TTA AAG CCA CTT CCT TTG TT	179500
m-Malat1-20	GGA ACA ATC TCT GGC TCA TG	190200
m-Malat1-22	TTT TAC TCC AGG CTT AAT GC	182000
m-Malat1-24	CTG CTC CGA GAT GGA ATG AA	198600
m-Malat1-26	CTA TTA GCT ATC CCA TCA TG	187800
m-Malat1-28	GCA CAA GTA CAT TGG AGC AC	200300
m-Malat1-30	AGA TGT TTA GCC ATG GTC AA	202100
m-Malat1-32	TGA CCT GAA GTC AAG ACA CC	196800
m-Malat1-34	TTA ATC ATA CTC CAG TCG CG	189300
m-Malat1-36	AGA CTA AAG GCT TCA GTG CT	196300
m-Malat1-38	AAA TGG CAT GTC TGC TTC AC	188000
m-Malat1-40	GGT CTC GAT ACA ATA CTG CT	190800
m-Malat1-42	TGG CGA TGT GGC AGA GAA AT	204000
m-Malat1-44	GGG GAA AAT TGA TGG CCT TT	196100
m-Malat1-46	CCA GCA CTG GTA TCA AAC AT	194800
m-Malat1-48	TCC ACT AAG ATG CTA GCT TG	189000
		190354
mouse-Xist-even	probe sequence	extinction coefficient
mouse-Xist-2	ATC AGC AGC AAC AGT ACA CG	203500
mouse-Xist-4	TCG AGA ATA GCC GTA TCA CG	199700
mouse-Xist-6	CAA CCC CGC ACA TAT AAA GA	202200
mouse-Xist-8	CAC ACT AAT ACG AGC ACT CC	191100
mouse-Xist-10	GAC AGT GAC TCA TCA CAG TC	195700
mouse-Xist-12	ATG GAA CGG GCT GAG TTT TA	200500
mouse-Xist-14	AGG CTC TTG CTG ACA AGT AA	197000
mouse-Xist-16	CAG TCT TAT AGG CTG AGT GA	199200
mouse-Xist-18	TAG CAA TAG GAC TGC ATG CA	201800
mouse-Xist-20	AGC AAT AGG ACC GTA TGC AA	208800
mouse-Xist-22	AGC AAT AGG ACC GTA TGC AA	208800
mouse-Xist-24	TAG CAA TAG GAC TGC ATG CA	201800
mouse-Xist-26	TAG CAA TAG GAC TGC ATG CA	201800
mouse-Xist-28	TAG CAA TAG GAC TGC ATG CA	201800
mouse-Xist-30	TAG CAA TAG GAC TGC ATG CA	201800
mouse-Xist-32	AGC AAT AGG ACC GTA TGC AA	208800
mouse-Xist-34	CAG TCT TAT AGG CTG AGT GA	199200
mouse-Xist-36	AGG GTA GTA TTA GGA CCT TG	204000
mouse-Xist-38	TCC AAT GCT TAG GAA GAG GG	202100
mouse-Xist-40	GCT TTA TAT TAG TGA GCC TC	188900
mouse-Xist-42	GTT TCC TTC TGT AGT GAA CA	189300
mouse-Xist-44	GCA GGA GTG CAA GAG ATA CA	213400
mouse-Xist-46	CTC AGC AAC CTC TGC AAT AA	190400
mouse-Xist-48	AAA CTA GCA GGG GAT TTG CT	198600
		200425
mouse-Xist-odd	probe sequence	extinction coefficient
mouse-Xist-1	AAA AAT GTT CCC CCA AAG CT	195300
mouse-Xist-3	ACA CCC ACT CAG TTT AAG AG	197800
mouse-Xist-5	TCC TAA TTC TTG GCG TAA CT	182700
mouse-Xist-7	TGC TAC CAC AAA TCA AGG CG	195100
mouse-Xist-9	CCA CCA AGC AAT AAT GCA CA	200000
mouse-Xist-11	CGA CAT CAT CCA ACA CTT CA	190500
mouse-Xist-13	AGT GCT GGC TAA ATC AGA GG	202400
mouse-Xist-15	TGG ACA CTG CAT TTT AGC AC	187900
mouse-Xist-17	ACT CCA TGA CTC TGT AAG TC	188900
mouse-Xist-19	AAT TCC ATG ACC CTA GAA GT	198900
mouse-Xist-21	AGG GAG TAT GGG GTA TAC AT	212000
mouse-Xist-23	CAG TCT TAT AGG CTG AGT GA	199200
mouse-Xist-25	CAG TCT TAT AGG CTG AGT GA	199200
mouse-Xist-27	CAG TCT TAT AGG CTG AGT GA	199200
mouse-Xist-29	CAG TCT TAT AGG CTG AGT GA	199200
mouse-Xist-31	AAT TCC ATG ACC CTA GAA GT	198900
mouse-Xist-33	CAG TCT TAT AGG CTG AGT GA	199200
mouse-Xist-35	GCA GAG GTT TTT GGC TGA AA	197600
mouse-Xist-37	AGA GAA GTG GTC TCA TTG GT	202000
mouse-Xist-39	GTA CAG GAG TCC TGA TCT AA	201700
mouse-Xist-41	TCT TAC CTT GAA GGA CCA TT	187400
mouse-Xist-43	TGA GAG TAG GAT CGT ATC CA	206800
mouse-Xist-45	AAA GAA TGC GGC CTT GTT GA	199300
mouse-Xist-47	ATT GTG CCT ATT AAG AGT CC	194100
		197304
mouse-Neat1	probe sequence	extinction coefficient
Neat1-1	ctgtcccaaaatctagtctcc	191200
Neat1-2	gttaaaggcgctttggaagct	202900
Neat1-3	aagcacggaacctaggcaaag	217800
Neat1-4	agtagggaagagtgagaccac	225000
Neat1-5	cccaggggcaaggttttaag	196200
Neat1-6	gcgcagacgttaaagtgtcc	194700
Neat1-7	tcatttacaacccaacagct	189000
Neat1-8	tctaaggaagattcctccac	191700
Neat1-9	cttcccactgttaaaccaca	184600
Neat1-10	tctaccaagtcggcagaatt	194500
Neat1-11	gaacaaaaggggccagaacc	208100
Neat1-12	tcccaagcttgatccataac	187800
Neat1-13	cacaacgggaggcgtttaca	198500
Neat1-14	tgttgtataaggcatgactcc	202500
Neat1-15	ataagcaaaccctgttgtct	192000
Neat1-16	gcaaagcactcatgaggtttc	203100
Neat1-17	aacccacaatggatgtattc	198400
Neat1-18	gtttttaagcaccattcaagc	199900
Neat1-19	caccacttttaagcacactc	182800
Neat1-20	tggttagtgggtttgtacac	192600
Neat1-21	ggtcgagaatgtaacagcca	206400
Neat1-22	aggcctaactatatgaaggca	216300
		198909
Slc25a28-exon	probe sequence	extinction coefficient
Slc25a28-ex-1	CAT GTG CGT GGT GAC AGT GG	193900
Slc25a28-ex-2	ATC GGG TAC ATC ACG CAA TG	198600
Slc25a28-ex-3	CAA CAC GTT CCG ATA GCG GG	193400
Slc25a28-ex-4	CTC ATG ATT CTC CAG AGA GC	189500
Slc25a28-ex-5	CTG TTG CTG TGA CGT TCA GC	179100
Slc25a28-ex-6	CAG GCA AAA TAG AGG GCG TG	207500
Slc25a28-ex-7	CCA TTG GCA ATA TGG CTA TT	190200
Slc25a28-ex-8	TGA AGT AAT GTC GCC ACA CA	200100
Slc25a28-ex-9	TTG ACG ACT TCC GCT GGA TT	181400
Slc25a28-ex-10	TAC GGC GAG TTG TAC ATC TG	192600
Slc25a28-ex-11	CGA ACA CAG TCT GTC ACG CG	189500
Slc25a28-ex-12	CGT GTA GCT GCG GTA AAA GG	199500
Slc25a28-ex-13	AAG GGG ACA TTC ATG GTC AG	204600
Slc25a28-ex-14	AGG TCA TGA AGT GAA TGG CT	204100
Slc25a28-ex-15	GTT AAA GTG CTC TTG CAG GA	196100
Slc25a28-ex-16	CAC AGA GCA CAT GGG AGC TG	198600
Slc25a28-ex-17	TTT ACA AAC GTC CAG TGG GG	195300
Slc25a28-ex-18	GAT TCC TGG GTG TTG AGC AG	192200
Slc25a28-ex-19	CTG TGA TGT GTC CAG TAA TG	194000
Slc25a28-ex-20	CTT GAT AGA CCG TCC TGA AG	192900
Slc25a28-ex-21	CTC GGA AGT AAG CAG TCA CC	195800
Slc25a28-ex-22	GTG GAG GGG ATC TGG TAA AT	205400
Slc25a28-ex-23	CAT ACA CAG ACC ATG CGA TG	198400
Slc25a28-ex-24	CCG CTT TGT GAT TAG GTA TT	186700
		194975

## Sheet: Alexa568-vis
	probe-set name	OD (260)	OD (568)	ε(Oligo) in average	ε(Alexa568)	cf260	% DOL by VIS
set-1	GFP	0.921	0.354	187721	91000	0.45	1.00468
set-2	Polr2a-exon-odd	0.724	0.288	194821	91000	0.45	1.08523
set-3	Polr2a-exon-even	0.709	0.268	196621	91000	0.45	1.02917
set-4	Actb-exon	0.674	0.258	190924	91000	0.45	1.01598
set-5	Actb-intron	0.72	0.27	199640	91000	0.45	1.03432
set-6	Gapdh-exon	0.614	0.227	193735	91000	0.45	0.988032
set-7	Gapdh-intron	0.588	0.221	196559	91000	0.45	1.02183
set-8	Malat1-odd	0.519	0.2	191925	91000	0.45	1.02936
set-9	Malat1-even	0.614	0.237	190354	91000	0.45	1.02335
set-10	Xist-even	0.615	0.239	200425	91000	0.45	1.08391
set-11	Xist-odd	0.587	0.229	197304	91000	0.45	1.07276
set-12	Neat1	0.671	0.235	198909	91000	0.45	0.94986
set-13	Slc25a28	0.556	0.204	194975	91000	0.45	0.985055

## Sheet: Alexa568-page
	Alexa568	DOL by PAGE(%)
set-1	GFP	88.57
set-2	Polr2a-exon-odd	92.73
set-3	Polr2a-exon-even	88.51
set-4	Actb-exon	90.89
set-5	Actb-intron	87.88
set-6	Gapdh-exon	87.04
set-7	Gapdh-intron	88.2
set-8	Malat1-odd	89.03
set-9	Malat1-even	90.49
set-10	Xist-even	89.58
set-11	Xist-odd	91.12
set-12	Neat1	84.35
set-13	Slc25a28	86.59
